# Supplementary material for: Predicting long-term dynamics of soil salinity and sodicity on a global scale
Source: PubMed Central journal article supplement (PMC7776813; doi:10.1073/pnas.2013771117), 2020-12-22
Supplement: pnas.2013771117.sapp.pdf [file pnas.2013771117.sapp.pdf]

# Supplementary Information

## Predicting Long-term Dynamics of Soil Salinity and Sodicity on a Global Scale

Amirhossein Hassani (1), Adisa Azapagic (1), and Nima Shokri\* (2)

(1) Department of Chemical Engineering and Analytical Science, The University of Manchester, Sackville Street, Manchester M13 9PL, UK

(2) Hamburg University of Technology, Institute of Geo-Hydroinformatics, Am Schwarzenberg-Campus 3 (E), 21073 Hamburg, Germany

\*[nima.shokri@tuhh.de](mailto:nima.shokri@tuhh.de)

### Contents

|     |                                                                         |    |
|-----|-------------------------------------------------------------------------|----|
| 1   | Extended Data.....                                                      | 2  |
| 2   | Frequency distribution of cell-level likelihoods and trends.....        | 14 |
| 3   | Model training.....                                                     | 20 |
| 4   | Limitations.....                                                        | 30 |
| 5   | Statistics on salt-affected regions.....                                | 33 |
| 6   | Computer codes.....                                                     | 54 |
| 6.1 | Pre-processing the predictors' layers.....                              | 54 |
| 6.2 | Extracting the predictors' values to training point feature layers..... | 57 |
| 6.3 | Model training.....                                                     | 58 |
| 6.4 | Generation of soil mask and spatio-temporal predictions.....            | 71 |
| 6.5 | Model deployment.....                                                   | 77 |
| 6.6 | Trend analysis.....                                                     | 79 |
| 6.7 | Rasterizing the generated tables.....                                   | 82 |
| 6.8 | Zonal statistics.....                                                   | 84 |
| 6.9 | Figures.....                                                            | 85 |

# 1 Extended Data

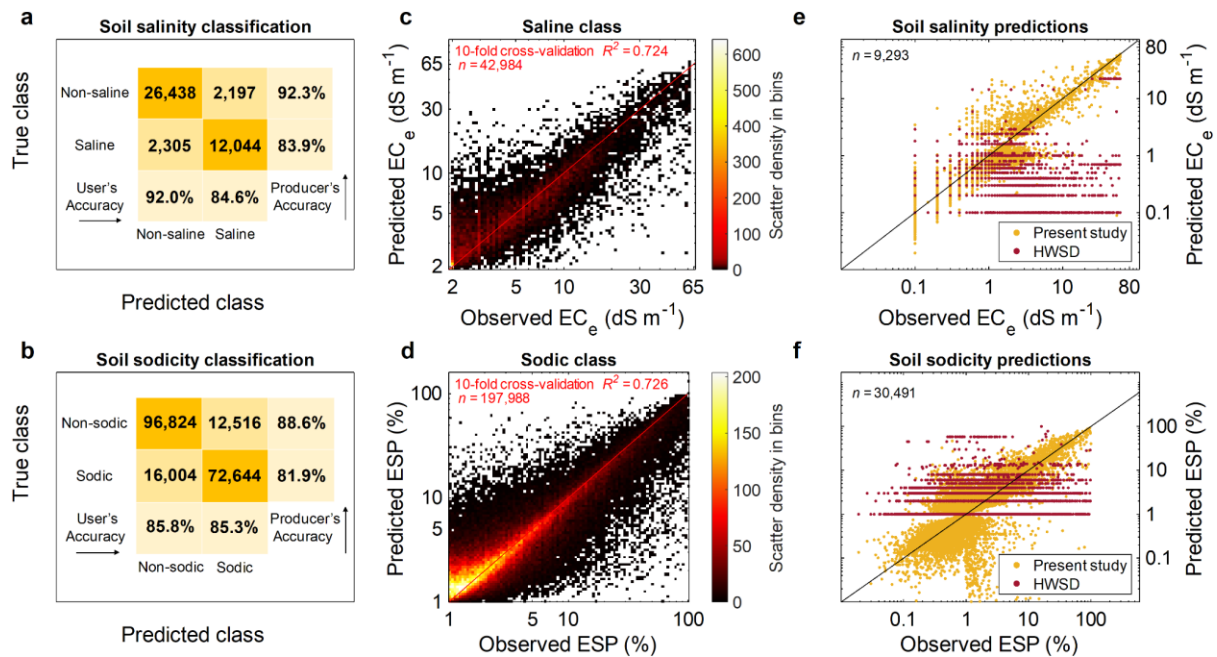

**Figure S1: Validation of the predictive capability of the developed two-part models for global estimation of soil  $EC_e$  and ESP.** **a** and **b**, The relation between classes of known measurements (True class) and the Predicted class as a result of 10-fold cross validation (10-CV). Producer's Accuracy shows the percentage of correct classifications relative to all classifications made by the classifier. User's Accuracy indicates to what percentage the predictions of the classifier can represent reality. **c** and **d**, Binned scatter plots showing the relation between the measured data and predictions of the regression part for saline and sodic classes as a result of 10-CV. **e** and **f**, Comparison between measured values of  $EC_e$  and ESP at the soil surface (0 - 30 cm) and the predicted values obtained using the model developed in the present study ( $R^2 EC_e = 0.83$ ,  $R^2 ESP = 0.86$ ) and those obtained from the Harmonized World Soil Database (HWSD;  $R^2 EC_e = 0.12$ ,  $R^2 ESP = 0.26$ ). A total of 9,293 and 30,491 measured data points are used in **e** and **f**.

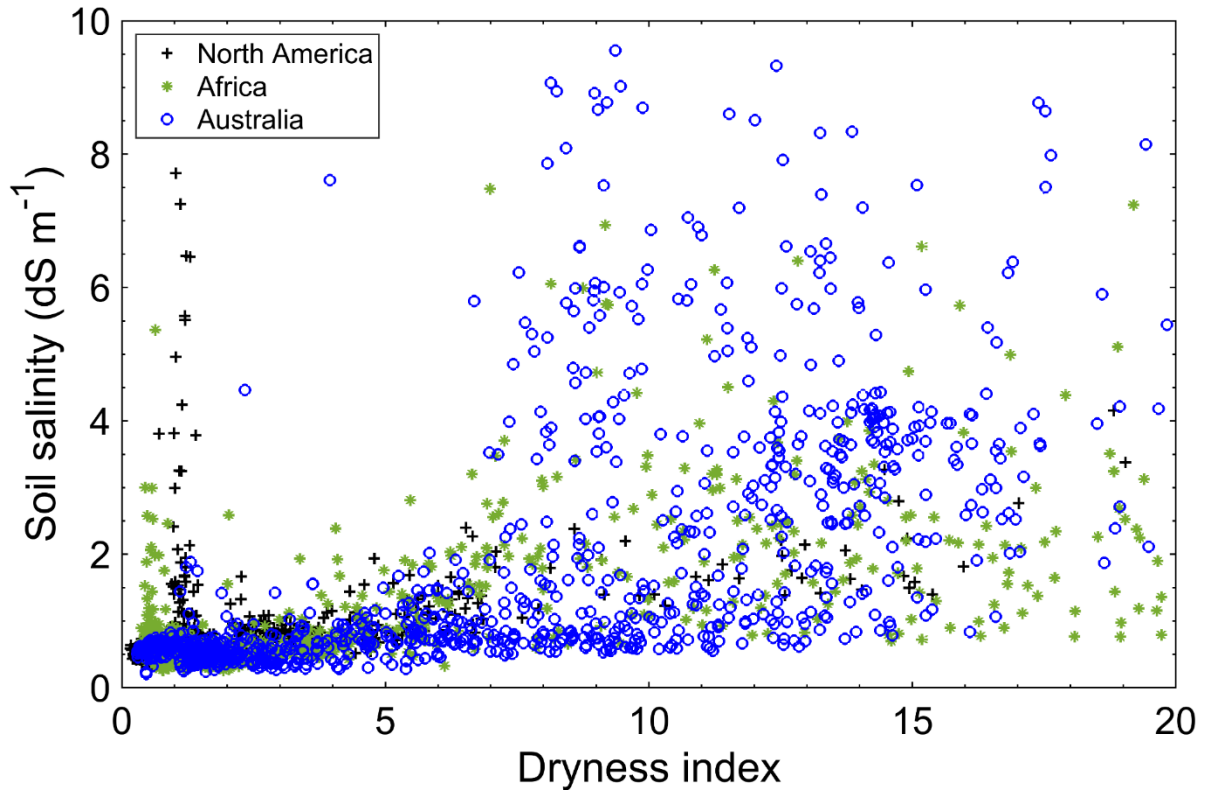

Figure S2: Catchment-scale average of the soil salinity predicted by ML-based models developed in the present study versus the dryness index (the ratio of long-term potential evapotranspiration to rainfall) for Australia, Africa, and North America.

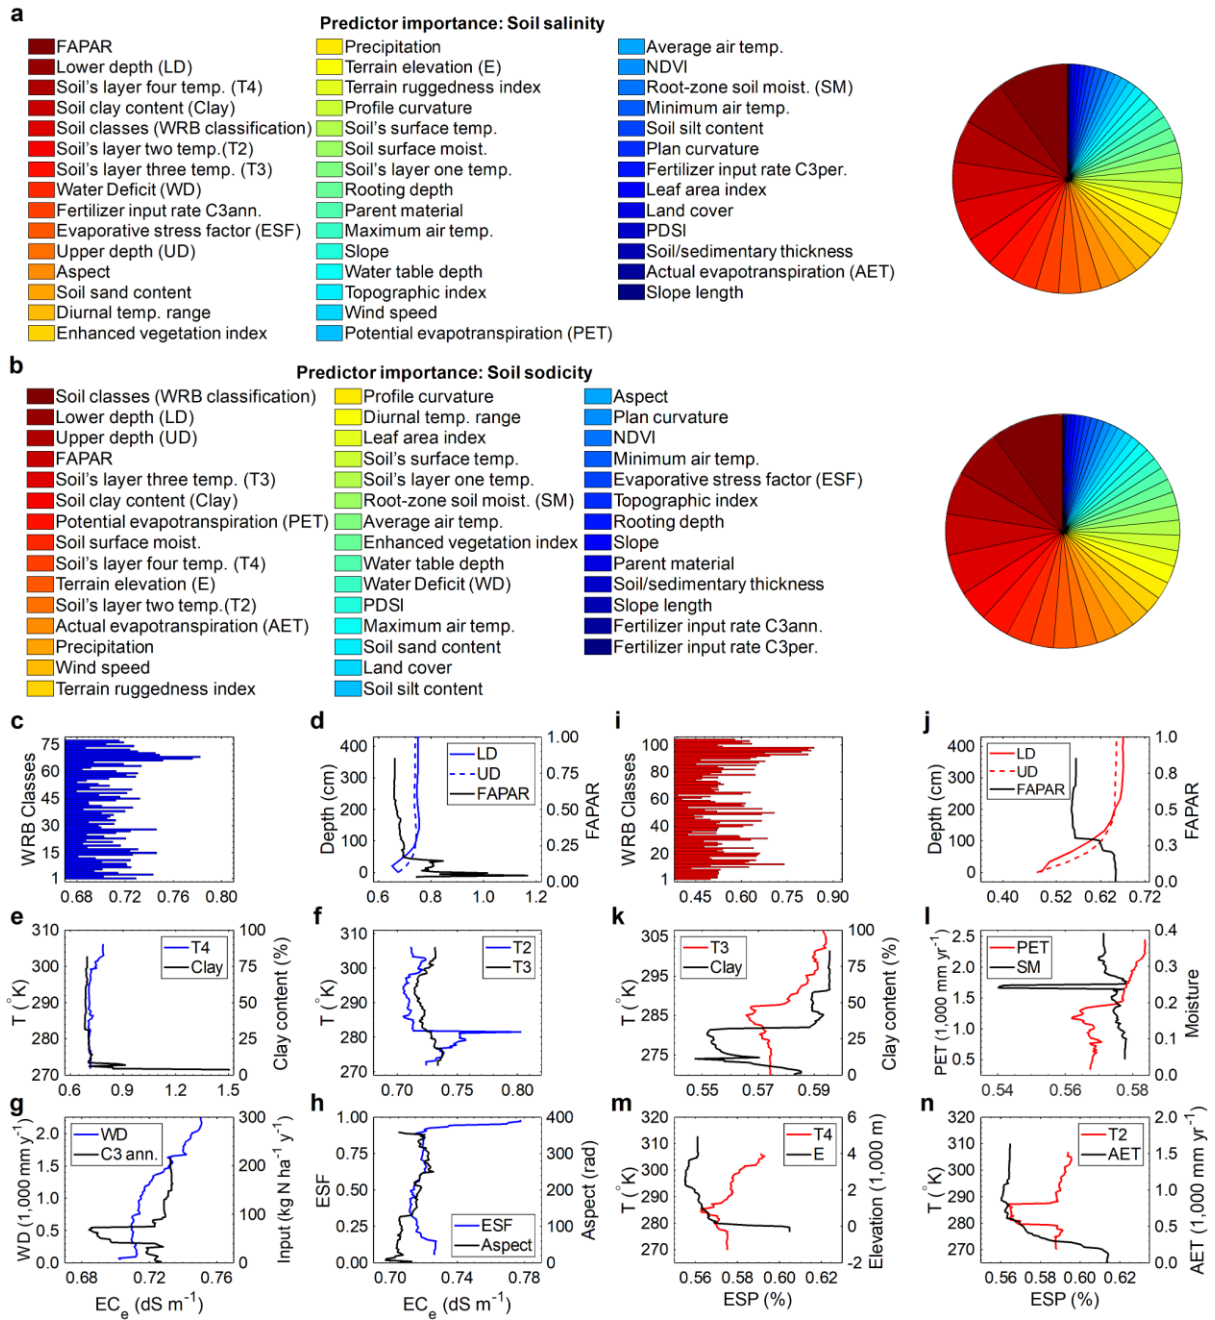

**Figure S3: Predictor importance and partial dependency plots.** **a** and **b**, The significance of predictors for regression models over the saline and sodic classes. **c** to **h**, The relation of the top 12 important predictors with predicted values of  $EC_e$ . **i** to **n**, The relation of the top 12 important predictors with predicted values of ESP. NDVI: Normalized Difference Vegetation Index; PDSI: Palmer Drought Severity Index; FAPAR: Fraction of Absorbed Photo-synthetically Active Radiation; C3ann.: C3-annual crops; C3per.: C3-perennial crops. For the full name and properties of the used predictors, see [Table S1](#).

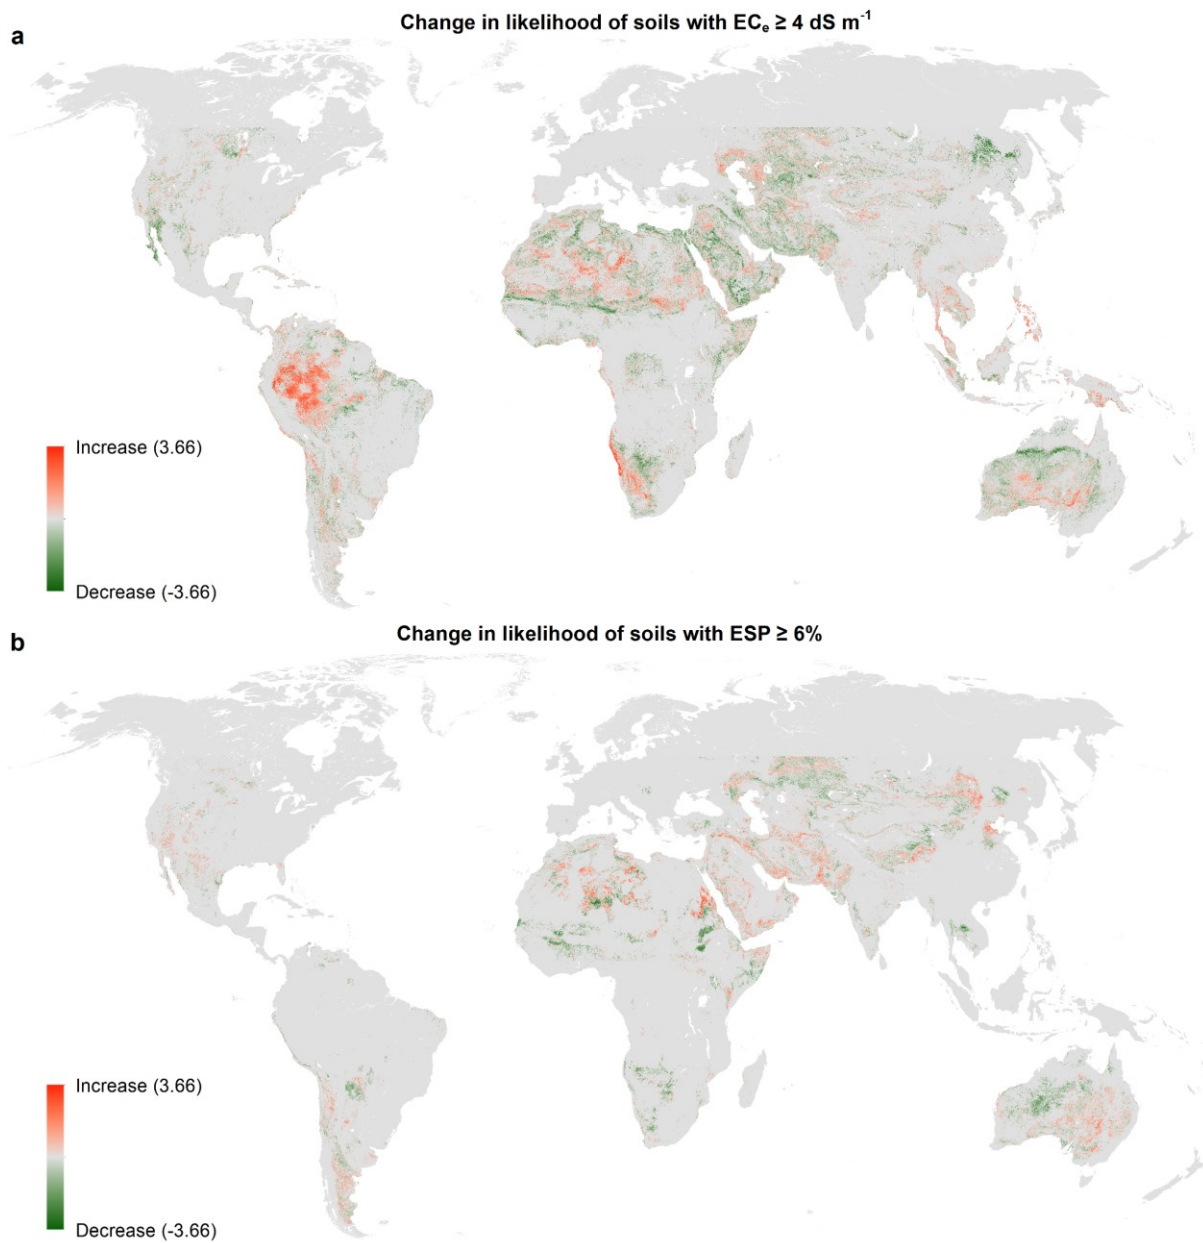

**Figure S4: Global distribution of the change in likelihood ( $\theta$ ) of surface soils (0 - 30 cm) with an  $EC_e \geq 4 \text{ dS m}^{-1}$  and  $ESP \geq 6\%$  in the 2000 to 2018 period, relative to the 1981 - 1999 period. A positive  $\theta$  indicates that the likelihood has increased and a negative value shows that it has decreased. Maps are delimited to -55 and 55 latitudes and higher latitudes are shown only for improving the visualisation of the maps.**

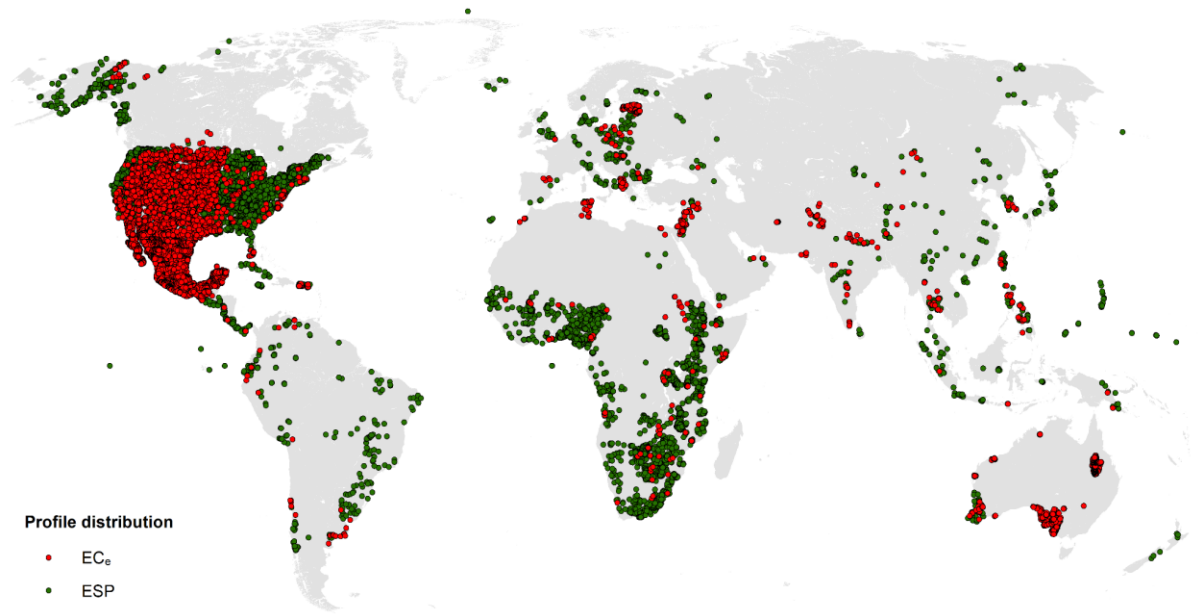

**Figure S5: Profiles data distribution used as input for training the two-part models.**

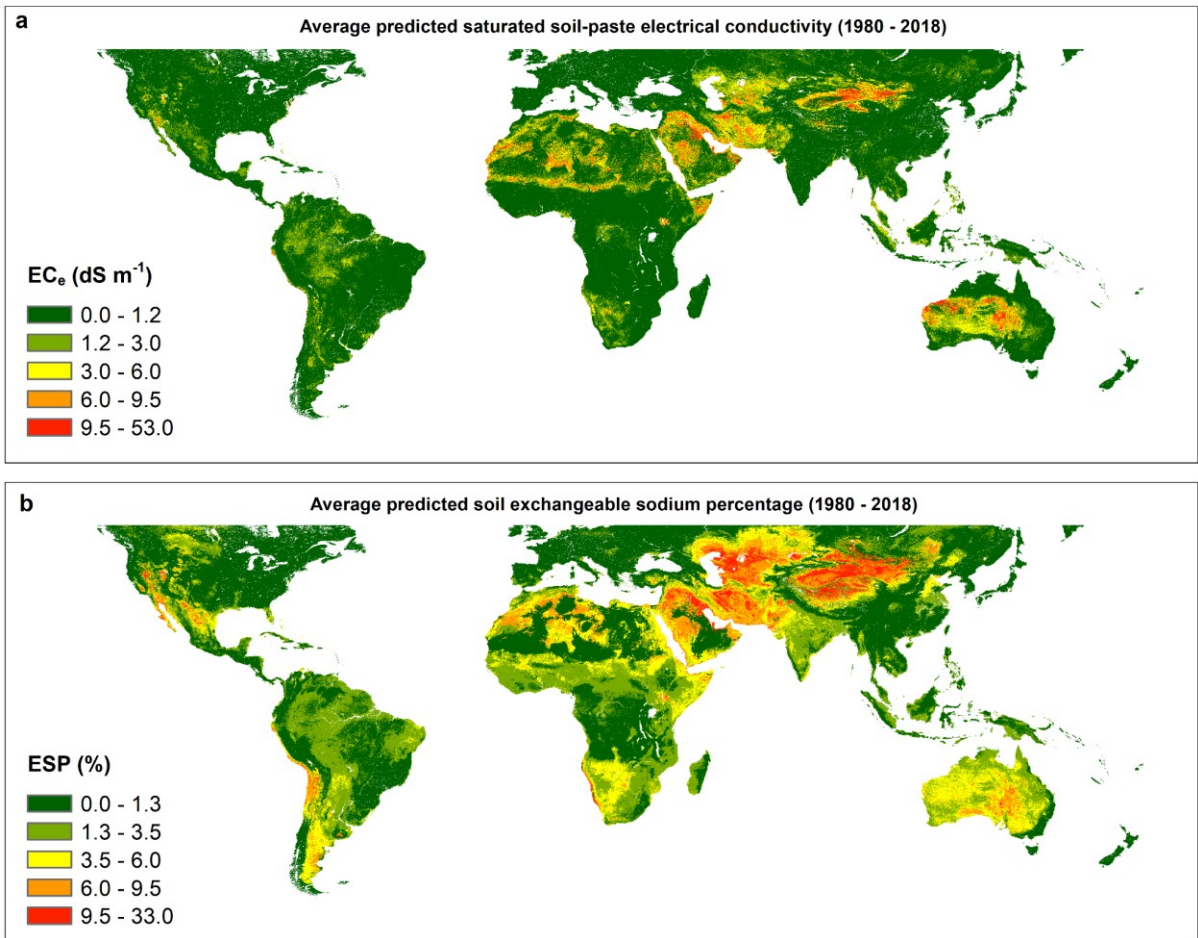

Figure S6: Average of annual predictions for surface soil (0 - 30 cm) EC<sub>e</sub> and ESP between 1980 and 2018.

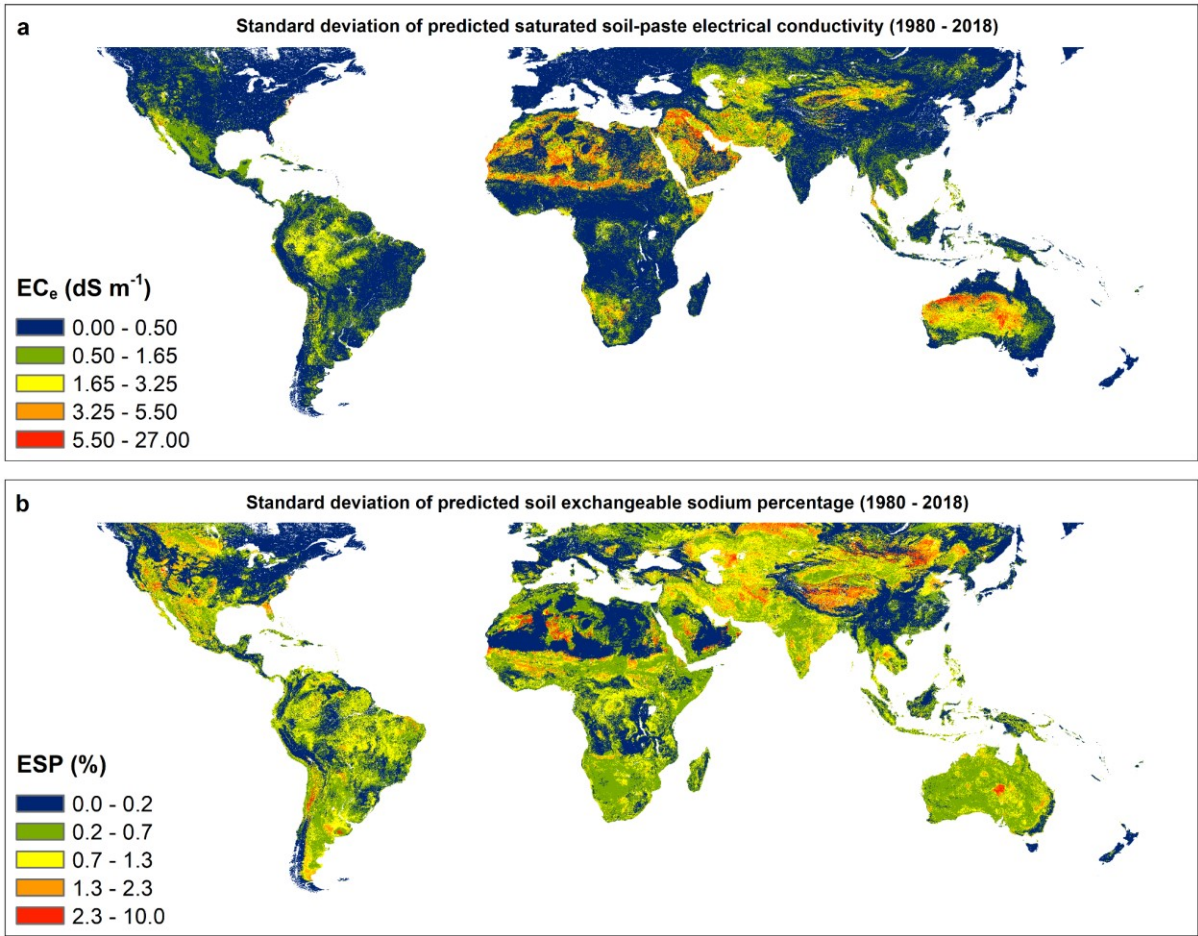

**Figure S7: Standard deviation of annual predictions for EC<sub>e</sub> and ESP between 1980 and 2018.**



**Table S1: Static predictors used for training the two-part models.**

| Static predictors                                                                                                                                                                                                                                                                                           |                                                                                                                                                                                                                          |                                                         |                 |                                                                                                |            |
|-------------------------------------------------------------------------------------------------------------------------------------------------------------------------------------------------------------------------------------------------------------------------------------------------------------|--------------------------------------------------------------------------------------------------------------------------------------------------------------------------------------------------------------------------|---------------------------------------------------------|-----------------|------------------------------------------------------------------------------------------------|------------|
| Predictor                                                                                                                                                                                                                                                                                                   | Pre-processing                                                                                                                                                                                                           | Source                                                  | Projection      | Extent                                                                                         | Resolution |
| Sample's upper depth (cm)                                                                                                                                                                                                                                                                                   | -                                                                                                                                                                                                                        | Original soil datasets<br>(See Methods)                 | -               | -                                                                                              | -          |
| Sample's lower depth (cm)                                                                                                                                                                                                                                                                                   |                                                                                                                                                                                                                          |                                                         |                 |                                                                                                |            |
| Elevation (m)                                                                                                                                                                                                                                                                                               | Projected the original DEMs to the World Mercator x- y-coordinates system (at 259.511 m resolution) by the cubic convolution method to calculate predictors' values in SAGA GIS (elevation only included re-projection). | SRTM Digital Elevation Database v4.1                    | GCS WGS 1984    | 180W-170E, 60S-60N                                                                             | 0.00208°   |
| Plan curvature                                                                                                                                                                                                                                                                                              |                                                                                                                                                                                                                          |                                                         |                 |                                                                                                |            |
| Profile curvature                                                                                                                                                                                                                                                                                           |                                                                                                                                                                                                                          |                                                         |                 |                                                                                                |            |
| Slope (degrees)                                                                                                                                                                                                                                                                                             |                                                                                                                                                                                                                          |                                                         |                 |                                                                                                |            |
| Slope length (m)                                                                                                                                                                                                                                                                                            | Projected the original DEMs to the World Mercator x- y-coordinates system (at 1,000 m resolution) by the cubic convolution method for reducing computational time in SAGA GIS.                                           |                                                         |                 |                                                                                                |            |
| Terrain Ruggedness Index (TRI)                                                                                                                                                                                                                                                                              |                                                                                                                                                                                                                          |                                                         |                 |                                                                                                |            |
| Aspect (degrees)                                                                                                                                                                                                                                                                                            | -                                                                                                                                                                                                                        |                                                         |                 |                                                                                                |            |
| Fertilizer input rate for C3-annual and perennial crops (kg nitrogen ha <sup>-1</sup> y <sup>-1</sup> ). C3 is one of the pathways that plants use to fix carbon during the process of photosynthesis. For C3 plants, the first carbon compound produced during photosynthesis contains three carbon atoms. | The original annual .nc layers were converted to geo-tiff rasters and per-cell average of rasters between 1980 and 2018 was calculated using the ArcGIS "cell statistics" tool.                                          | Land-Use Harmonization (LUH2 v2h_high)                  | GCS WGS 1984    | 180W-180E, 90S-90N                                                                             | 0.25°      |
| World Reference Base soil classes (120 classes)                                                                                                                                                                                                                                                             | -                                                                                                                                                                                                                        | ISRIC-SoilGrids250                                      | GCS WGS 1984    | 180W-180E, 62S-87.37N                                                                          | 0.00208°   |
| Soil clay content (%)                                                                                                                                                                                                                                                                                       | Per-cell average of five standard soil depths: 0, 15, 30, 60, and 100 cm was calculated using the trapezoidal rule and ArcGIS "cell statistics" tool.                                                                    |                                                         |                 |                                                                                                |            |
| Soil silt content (%)                                                                                                                                                                                                                                                                                       |                                                                                                                                                                                                                          |                                                         |                 |                                                                                                |            |
| Soil sand content (%)                                                                                                                                                                                                                                                                                       |                                                                                                                                                                                                                          |                                                         |                 |                                                                                                |            |
| Parent material lithological classes (16 classes)                                                                                                                                                                                                                                                           | The original shape file was first converted to a geo-tiff format and then re-projected to the GCS WGS 1984 (0.01055° resolution).                                                                                        | GLiM                                                    | World Eckert IV | Left: -16,653,453.7 m<br>Right: 16,653,453.7 m<br>Bottom: -8,460,600.9 m<br>Top: 8,376,733.0 m | Polygon    |
| Water table depth (m)                                                                                                                                                                                                                                                                                       | Raster datasets for different continents were merged into a single global one.                                                                                                                                           | Fan, et al. (1)                                         | GCS WGS 1984    | 180W-180E, 53S-84N                                                                             | 0.00833°   |
| Topographic Index                                                                                                                                                                                                                                                                                           | The original .nc file was converted to a geo-tiff raster.                                                                                                                                                                | Marthews, et al. (2)                                    | GCS WGS 1984    | 180W-180E, 56.35S-86.09N                                                                       | 0.00208°   |
| Average soil and sedimentary-deposit thickness (m)                                                                                                                                                                                                                                                          | -                                                                                                                                                                                                                        | Pelletier, et al. (3)                                   | GCS WGS 1984    | 180W-180E, 60S-90N                                                                             | 0.00833°   |
| Average plant rooting depth (m)                                                                                                                                                                                                                                                                             | The original dataset was geo-referenced to the GCS WGS 1984 coordinates system by the nearest neighbour method.                                                                                                          | ISLSCP II Ecosystem Rooting Depths (95ecosys_rootdepth) | Undefined       | 180.25W-179.75E, 90.25S-89.75N                                                                 | 0.5°       |

**Table S1 cont.: Dynamic predictors used for training the two-part models.**

| Dynamic predictors                                                                             |                                                                            |                                                                                                                                                                           |                                                                                                                                                          |                                                                                                  |                                  |                                                                                                                                                                                                                                                                                                                                            |                                                                                                                                                                                                                                                                                                   |
|------------------------------------------------------------------------------------------------|----------------------------------------------------------------------------|---------------------------------------------------------------------------------------------------------------------------------------------------------------------------|----------------------------------------------------------------------------------------------------------------------------------------------------------|--------------------------------------------------------------------------------------------------|----------------------------------|--------------------------------------------------------------------------------------------------------------------------------------------------------------------------------------------------------------------------------------------------------------------------------------------------------------------------------------------|---------------------------------------------------------------------------------------------------------------------------------------------------------------------------------------------------------------------------------------------------------------------------------------------------|
| Predictor                                                                                      | Averaging Method                                                           | Source                                                                                                                                                                    | Projection                                                                                                                                               | Extent                                                                                           | Spatial resolution               | Pre-processing                                                                                                                                                                                                                                                                                                                             |                                                                                                                                                                                                                                                                                                   |
| Precipitation (mm yr <sup>-1</sup> )                                                           | Decadal average of yearly accumulations                                    | CRU TS v. 4.03                                                                                                                                                            | GCS WGS 1984                                                                                                                                             | 180W-180E, 90S-90N                                                                               | 0.5°                             | Original monthly .nc files were converted to geo-tiff layers and decadal per-cell averages were computed in ArcGIS using the “cell statistics” tool.                                                                                                                                                                                       |                                                                                                                                                                                                                                                                                                   |
| Potential evapotranspiration (mm yr <sup>-1</sup> )                                            |                                                                            |                                                                                                                                                                           |                                                                                                                                                          |                                                                                                  |                                  |                                                                                                                                                                                                                                                                                                                                            |                                                                                                                                                                                                                                                                                                   |
| Diurnal temperature range (°C)                                                                 | Decadal average of monthly means                                           |                                                                                                                                                                           |                                                                                                                                                          |                                                                                                  |                                  |                                                                                                                                                                                                                                                                                                                                            |                                                                                                                                                                                                                                                                                                   |
| Average air temperature (°C)                                                                   |                                                                            |                                                                                                                                                                           |                                                                                                                                                          |                                                                                                  |                                  |                                                                                                                                                                                                                                                                                                                                            |                                                                                                                                                                                                                                                                                                   |
| Maximum air temperature (°C)                                                                   |                                                                            |                                                                                                                                                                           |                                                                                                                                                          |                                                                                                  |                                  |                                                                                                                                                                                                                                                                                                                                            |                                                                                                                                                                                                                                                                                                   |
| Minimum air temperature (°C)                                                                   |                                                                            |                                                                                                                                                                           |                                                                                                                                                          |                                                                                                  |                                  |                                                                                                                                                                                                                                                                                                                                            |                                                                                                                                                                                                                                                                                                   |
| Actual evapotranspiration (mm yr <sup>-1</sup> )                                               | Five-year average of yearly accumulations                                  | TerraClimate                                                                                                                                                              | GCS WGS 1984                                                                                                                                             | 180W-180E, 90S-90N                                                                               | 0.0416°                          | Original monthly .nc files were converted to geo-tiff layers and five-year per-cell averages were computed in ArcGIS using the “cell statistics” tool.                                                                                                                                                                                     |                                                                                                                                                                                                                                                                                                   |
| Water deficit (mm yr <sup>-1</sup> )                                                           |                                                                            |                                                                                                                                                                           |                                                                                                                                                          |                                                                                                  |                                  |                                                                                                                                                                                                                                                                                                                                            |                                                                                                                                                                                                                                                                                                   |
| PDSI                                                                                           | Five-year average of monthly values                                        |                                                                                                                                                                           |                                                                                                                                                          |                                                                                                  |                                  |                                                                                                                                                                                                                                                                                                                                            |                                                                                                                                                                                                                                                                                                   |
| Root-zone soil moisture (mm)                                                                   |                                                                            |                                                                                                                                                                           |                                                                                                                                                          |                                                                                                  |                                  |                                                                                                                                                                                                                                                                                                                                            |                                                                                                                                                                                                                                                                                                   |
| Soil surface (2-5 cm) moisture (percentage of total saturation), remotely-sensed by satellites | Yearly mean                                                                | Soil moisture gridded data (v201812.0.1) Climate Data Store                                                                                                               | GCS WGS 1984                                                                                                                                             | 180W-180E, 90S-90N                                                                               | 0.25°                            | Original monthly (combined passive and active sensor type) .nc files were converted to geo-tiff layers and annual per-cell averages were computed in ArcGIS using the “cell statistics” tool.                                                                                                                                              |                                                                                                                                                                                                                                                                                                   |
| Evaporative stress factor (S)                                                                  |                                                                            | GLEAM v3.3 Datasets                                                                                                                                                       | GCS WGS 1984                                                                                                                                             | 180W-180E, 90S-90N                                                                               | 0.25°                            | Original daily .nc files were converted to geo-tiff layers and annual per-cell averages were computed in ArcGIS using the “cell statistics” tool.                                                                                                                                                                                          |                                                                                                                                                                                                                                                                                                   |
| Two-band Enhanced Vegetation Index (EVI2)                                                      |                                                                            | NASA (LP DAAC) Vegetation Index and Phenology Vegetation Indices, VIP30 v. 004 (Note for 2014-2018, we used NDVI and EVI from MOD13C2 Version 6 product from Terra MODIS) | GCS Unknown datum based upon the Clarke 1866 ellipsoid                                                                                                   | 180W-180E, 90S-90N                                                                               | 0.05°                            | EVI2 (and/or EVI) and NDVI sub-datasets were extracted from the original monthly .hdf files, re-projected to the GCS WGS 1984 using the bilinear interpolation method, and saved as geo-tiffs. Annual per-cell averages of EVI2 (and/or EVI) were then calculated in ArcGIS using the “cell statistics” tool.                              |                                                                                                                                                                                                                                                                                                   |
| Normalized Difference Vegetation Index (NDVI)                                                  |                                                                            |                                                                                                                                                                           |                                                                                                                                                          |                                                                                                  |                                  |                                                                                                                                                                                                                                                                                                                                            |                                                                                                                                                                                                                                                                                                   |
| Fraction of Absorbed Photosynthetically Active Radiation (FAPAR)                               |                                                                            |                                                                                                                                                                           | NOAA (National Oceanic and Atmospheric Administration) Climate Data Record (CDR) of Advanced Very High Resolution Radiometer (AVHRR) Surface Reflectance | GCS WGS 1984                                                                                     | 180W-180E, 90S-90N               | 0.05°                                                                                                                                                                                                                                                                                                                                      | Original daily .nc files were converted to geo-tiffs. Annual per-cell averages of FAPAR and LAI were then calculated from the daily raster layers in ArcGIS using the “cell statistics” tool.                                                                                                     |
| Leaf Area Index (LAI)                                                                          |                                                                            |                                                                                                                                                                           |                                                                                                                                                          |                                                                                                  |                                  |                                                                                                                                                                                                                                                                                                                                            |                                                                                                                                                                                                                                                                                                   |
| Wind speed (m s <sup>-1</sup> )                                                                |                                                                            |                                                                                                                                                                           |                                                                                                                                                          |                                                                                                  |                                  |                                                                                                                                                                                                                                                                                                                                            |                                                                                                                                                                                                                                                                                                   |
| Soil skin temperature (°K)                                                                     |                                                                            |                                                                                                                                                                           |                                                                                                                                                          |                                                                                                  |                                  |                                                                                                                                                                                                                                                                                                                                            |                                                                                                                                                                                                                                                                                                   |
| Soil layer one (0-7 cm) temperature (°K)                                                       |                                                                            |                                                                                                                                                                           | ERA5 re-analysis monthly averages adopted from Climate Data Store                                                                                        | GCS WGS 1984                                                                                     | 0.125W-359.875E, 90.125S-90.125N | 0.25°                                                                                                                                                                                                                                                                                                                                      | Original Monthly .nc files were converted to geo-tiffs and re-projected to the GCS WGS 1984 to change the extent of the rasters (180W-180E, 90S-90N was the desirable extent). Annual per-cell averages were then calculated from daily raster layers in ArcGIS using the “cell statistics” tool. |
| Soil layer two (7-28 cm) temperature (°K)                                                      |                                                                            |                                                                                                                                                                           |                                                                                                                                                          |                                                                                                  |                                  |                                                                                                                                                                                                                                                                                                                                            |                                                                                                                                                                                                                                                                                                   |
| Soil layer three (28-100 cm) temperature (°K)                                                  |                                                                            |                                                                                                                                                                           |                                                                                                                                                          |                                                                                                  |                                  |                                                                                                                                                                                                                                                                                                                                            |                                                                                                                                                                                                                                                                                                   |
| Soil layer four (100-289 cm) temperature (°K)                                                  |                                                                            |                                                                                                                                                                           |                                                                                                                                                          |                                                                                                  |                                  |                                                                                                                                                                                                                                                                                                                                            |                                                                                                                                                                                                                                                                                                   |
| Land cover (16 classes)                                                                        | 1980 - 1996, attributed to the 1993 land cover layer.                      | Global Land Cover Characteristics Data Base Version 2.0                                                                                                                   | GCS WGS 1984                                                                                                                                             | 180W-180E, 90S-90N                                                                               | 0.00833°                         | The International Geosphere-Biosphere Programme (IGBP) land cover legend was chosen since it was available in both datasets. IGBP sub-datasets were extracted from the original .hdf files and saved as geo-tiffs. Layers with the sinusoidal coordinates system were re-projected to the GCS WGS 1984 using the nearest neighbour method. |                                                                                                                                                                                                                                                                                                   |
|                                                                                                | 1997 - 2018, attributed to the layer with the nearest year of acquisition. | Collection 6 MODIS Land Cover (MCD12Q1 and MCD12C1) products for years 2000, 2006, 2014, and 2018                                                                         | Unknown datum based upon the custom spheroid sinusoidal                                                                                                  | Left: -20,015,108.8 m<br>Right: 20,015,107.7 m<br>Bottom: -10,007,554.1 m<br>Top: 10,007,554.1 m | 463.31 meter                     |                                                                                                                                                                                                                                                                                                                                            |                                                                                                                                                                                                                                                                                                   |

**Table S2: Accuracy metrics and the results of hyperparameter optimisation for different parts of the fitted two-part models.**

|                                       | Hyperparameters (4)             |                           | Method                    | Number of learning cycles | Learn rate           | Minimum leaf size        | Maximum number of splits      | Number of variables to sample | Split Criterion  |                  |
|---------------------------------------|---------------------------------|---------------------------|---------------------------|---------------------------|----------------------|--------------------------|-------------------------------|-------------------------------|------------------|------------------|
| EC <sub>c</sub> (dS m <sup>-1</sup> ) | Classification                  | LB <sup>a</sup>           | -                         | 34.76                     | 0.32                 | 4.97                     | 9,886.65                      | 5.44                          | -                |                  |
|                                       |                                 | UB <sup>b</sup>           | -                         | 56.51                     | 0.55                 | 39.58                    | 18,553.18                     | 18.44                         | -                |                  |
|                                       |                                 | Best                      | AdaBoostM1                | 50.00                     | 0.47                 | 21.00                    | 2,664.00                      | -                             | gdi              |                  |
|                                       | Regression                      | None (0 - 2) <sup>c</sup> | LB                        | -                         | 61.37                | 0.09                     | 5.97                          | 9,716.32                      | 11.34            | -                |
|                                       |                                 |                           | UB                        | -                         | 97.83                | 0.13                     | 12.60                         | 15,242.99                     | 18.04            | -                |
|                                       |                                 |                           | Best                      | LSBoost                   | 80.00                | 0.07                     | 8.00                          | 23,408.00                     | 8.00             | -                |
|                                       |                                 | Saline (2 - 60)           | LB                        | -                         | 105.78               | 0.08                     | 4.60                          | 5,037.27                      | 8.80             | -                |
|                                       |                                 |                           | UB                        | -                         | 166.89               | 0.13                     | 11.10                         | 8,632.70                      | 15.96            | -                |
|                                       |                                 |                           | Best                      | LSBoost                   | 366.00               | 0.05                     | 3.00                          | 9,365.00                      | 1.00             | -                |
|                                       | Classification accuracy metrics |                           |                           | Binomial deviance loss    | Classification error | Accuracy (%)             | Precision                     | Recall                        | MCC <sup>d</sup> | MOF <sup>e</sup> |
|                                       | Classification                  | LB                        | 0.192                     | 0.120                     | 88.338               | 0.922                    | 0.897                         | 0.743                         | 0.118            |                  |
|                                       |                                 | UB                        | 0.218                     | 0.124                     | 88.876               | 0.927                    | 0.909                         | 0.753                         | 0.124            |                  |
|                                       |                                 | Best                      | 0.187                     | 0.117                     | 89.650               | 0.921                    | 0.924                         | 0.767                         | 0.109            |                  |
|                                       | Regression accuracy metrics     |                           |                           | RMSE (log)                | MAE (log)            | NSE <sup>f</sup> (log)   | RMSE                          | MAE                           | NSE              | MOF              |
|                                       | Regression                      | None (0 - 2)              | LB                        | 0.069                     | 0.047                | 0.711                    | 0.294                         | 0.189                         | 0.640            | 0.005            |
|                                       |                                 |                           | UB                        | 0.070                     | 0.048                | 0.718                    | 0.297                         | 0.192                         | 0.648            | 0.005            |
| Best                                  |                                 |                           | 0.068                     | 0.047                     | 0.727                | 0.289                    | 0.186                         | 0.659                         | 0.005            |                  |
| Saline (2 - 60)                       |                                 | LB                        | 0.190                     | 0.129                     | 0.730                | 5.230                    | 2.501                         | 0.703                         | 0.037            |                  |
|                                       |                                 | UB                        | 0.193                     | 0.132                     | 0.738                | 5.318                    | 2.551                         | 0.713                         | 0.038            |                  |
|                                       |                                 | Best                      | 0.187                     | 0.127                     | 0.747                | 5.119                    | 2.451                         | 0.724                         | 0.037            |                  |
| Hyperparameters (4)                   |                                 | Method                    | Number of learning cycles | Learn rate                | Minimum leaf size    | Maximum number of splits | Number of variables to sample | Split Criterion               |                  |                  |
| ESP (%)                               | Classification                  | LB                        | -                         | 75.80                     | -                    | 1.27                     | 80,234.76                     | 3.42                          | -                |                  |
|                                       |                                 | UB                        | -                         | 122.04                    | -                    | 1.74                     | 121,561.84                    | 6.81                          | -                |                  |
|                                       |                                 | Best                      | Bag                       | 208.00                    | -                    | 1.00                     | 80,815.00                     | 2.00                          | deviance         |                  |
|                                       | Regression                      | None (0 - 1)              | LB                        | -                         | 220.45               | 0.04                     | 6.80                          | 19,872.75                     | 2.03             | -                |
|                                       |                                 |                           | UB                        | -                         | 313.56               | 0.06                     | 11.33                         | 45,713.13                     | 2.80             | -                |
|                                       |                                 |                           | Best                      | LSBoost                   | 378.00               | 0.03                     | 12.00                         | 95,924.00                     | 2.00             | -                |
|                                       |                                 | Sodic (1 - 98.59)         | LB                        | -                         | 196.73               | 0.06                     | 4.80                          | 34,059.28                     | 2.27             | -                |
|                                       |                                 |                           | UB                        | -                         | 281.72               | 0.09                     | 11.75                         | 53,918.61                     | 2.93             | -                |
|                                       |                                 |                           | Best                      | LSBoost                   | 295.00               | 0.03                     | 1.00                          | 36,274.00                     | 2.00             | -                |
|                                       | Classification accuracy metrics |                           |                           | Binomial deviance loss    | Classification error | Accuracy (%)             | Precision                     | Recall                        | MCC              | MOF              |
|                                       | Classification                  | LB                        | 0.226                     | 0.148                     | 85.053               | 0.851                    | 0.883                         | 0.697                         | 0.152            |                  |
|                                       |                                 | UB                        | 0.229                     | 0.149                     | 85.248               | 0.854                    | 0.885                         | 0.701                         | 0.154            |                  |
|                                       |                                 | Best                      | 0.229                     | 0.144                     | 85.593               | 0.859                    | 0.885                         | 0.708                         | 0.149            |                  |
|                                       | Regression accuracy metrics     |                           |                           | RMSE (log)                | MAE (log)            | NSE (log)                | RMSE                          | MAE                           | NSE              | MOF              |
|                                       | Regression                      | None (0 - 1)              | LB                        | 0.071                     | 0.046                | 0.556                    | 0.226                         | 0.142                         | 0.530            | 0.005            |
|                                       |                                 |                           | UB                        | 0.071                     | 0.046                | 0.560                    | 0.227                         | 0.144                         | 0.533            | 0.005            |
| Best                                  |                                 |                           | 0.071                     | 0.046                     | 0.563                | 0.225                    | 0.142                         | 0.537                         | 0.005            |                  |
| Sodic (1 - 98.59)                     |                                 | LB                        | 0.231                     | 0.160                     | 0.740                | 6.924                    | 2.683                         | 0.705                         | 0.056            |                  |
|                                       |                                 | UB                        | 0.233                     | 0.162                     | 0.744                | 7.030                    | 2.726                         | 0.714                         | 0.057            |                  |
|                                       |                                 | Best                      | 0.231                     | 0.158                     | 0.744                | 6.772                    | 2.616                         | 0.726                         | 0.055            |                  |

<sup>a</sup> Lower band

<sup>b</sup> Upper band

<sup>c</sup> Minimum and maximum of the training set

<sup>d</sup> Mathews Correlation Coefficient

<sup>e</sup> Minimum observed objective function

<sup>f</sup> Nash-Sutcliffe model efficiency coefficient

**Table S3: Total area of the salt-affected soils at the country level.**

| Country                          | Salt-affected area (Mha) | Country           | Salt-affected area (Mha) |
|----------------------------------|--------------------------|-------------------|--------------------------|
| China                            | 211.748                  | Tunisia           | 2.163                    |
| Australia                        | 131.407                  | South Africa      | 1.995                    |
| Kazakhstan                       | 93.312                   | Colombia          | 1.657                    |
| Iran                             | 88.336                   | Kuwait            | 1.573                    |
| Saudi Arabia                     | 68.191                   | Eritrea           | 1.494                    |
| Algeria                          | 63.932                   | Turkey            | 1.391                    |
| Mongolia                         | 42.981                   | Malaysia          | 1.265                    |
| Turkmenistan                     | 36.992                   | Tajikistan        | 1.228                    |
| Pakistan                         | 36.195                   | Indonesia         | 1.227                    |
| Iraq                             | 30.544                   | Botswana          | 1.125                    |
| Uzbekistan                       | 27.355                   | Qatar             | 1.038                    |
| Libya                            | 21.535                   | Thailand          | 1.019                    |
| Mexico                           | 21.073                   | Angola            | 0.79017                  |
| United States                    | 20.747                   | Myanmar           | 0.75299                  |
| Afghanistan                      | 20.379                   | Israel            | 0.65719                  |
| Niger                            | 17.341                   | Philippines       | 0.65335                  |
| Argentina                        | 17.244                   | Nigeria           | 0.61718                  |
| Mauritania                       | 17.024                   | Azerbaijan        | 0.59546                  |
| Chile                            | 15.758                   | Djibouti          | 0.52259                  |
| Western Sahara                   | 15.254                   | Papua New Guinea  | 0.39629                  |
| Chad                             | 14.761                   | Venezuela         | 0.36037                  |
| Sudan                            | 13.202                   | Senegal           | 0.30626                  |
| Somalia                          | 13.114                   | Bahamas           | 0.27594                  |
| Syria                            | 11.647                   | Kyrgyzstan        | 0.25453                  |
| Oman                             | 10.495                   | Vietnam           | 0.21236                  |
| Mali                             | 9.863                    | Burkina Faso      | 0.19560                  |
| Namibia                          | 8.605                    | Guyana            | 0.19282                  |
| Peru                             | 7.782                    | Republic of Congo | 0.18667                  |
| Morocco                          | 7.295                    | Ecuador           | 0.17812                  |
| India                            | 6.938                    | North Korea       | 0.14791                  |
| Jordan                           | 6.768                    | Madagascar        | 0.12221                  |
| Egypt                            | 6.695                    | Netherlands       | 0.10879                  |
| Yemen                            | 6.545                    | Tanzania          | 0.10358                  |
| Kenya                            | 5.261                    | Palestine         | 0.10204                  |
| Brazil                           | 4.998                    | Gabon             | 0.10049                  |
| Bolivia                          | 4.681                    | Cuba              | 0.09567                  |
| Ethiopia                         | 3.599                    | Cambodia          | 0.09222                  |
| United Arab Emirates             | 2.966                    | Mozambique        | 0.08535                  |
| Democratic Republic of the Congo | 2.230                    | Japan             | 0.06442                  |

**Table S4: Total area of the salt-affected soils at the climate, biome, and land cover levels.** For the full name of the climate zones see [Figure S12](#).

| Climate | Salt-affected area (Mha) | Biome                                                        | Salt-affected area (Mha) |
|---------|--------------------------|--------------------------------------------------------------|--------------------------|
| BWh     | 594.398                  | Deserts and Xeric Shrublands                                 | 928.225                  |
| Bwk     | 339.908                  | Montane Grasslands and Shrublands                            | 86.454                   |
| Bsk     | 103.596                  | Tropical and Subtropical Grasslands, Savannas and Shrublands | 52.459                   |
| ET      | 55.528                   | Temperate Grasslands, Savannas and Shrublands                | 38.064                   |
| BSh     | 43.330                   | Tropical and Subtropical Moist Broadleaf Forests             | 16.420                   |
| Af      | 9.513                    | Mediterranean Forests, Woodlands and Scrub                   | 15.019                   |
| AW      | 4.718                    | Temperate Broadleaf and Mixed Forests                        | 14.220                   |
| Csa     | 4.461                    | Flooded Grasslands and Savannas                              | 10.305                   |
| Am      | 4.445                    | Temperate Conifer Forests                                    | 5.514                    |
| Cfa     | 3.015                    | Tropical and Subtropical Dry Broadleaf Forests               | 2.734                    |
| Cwa     | 1.965                    | Mangroves                                                    | 1.538                    |
| Dfb     | 1.940                    | Tropical and Subtropical Coniferous Forests                  | 0.195                    |
| CSb     | 1.346                    |                                                              |                          |
| Dwc     | 1.142                    | Land cover                                                   | Salt-affected area (Mha) |
| Cfb     | 1.112                    | Barren                                                       | 536.109                  |
| Dfa     | 0.961                    | Open Shrublands                                              | 144.120                  |
| Dfc     | 0.777                    | Grasslands                                                   | 77.372                   |
| Dwa     | 0.506                    | Croplands                                                    | 16.490                   |
| Dsb     | 0.480                    | Evergreen Broadleaf Forests                                  | 10.164                   |
| Cwb     | 0.419                    | Savannas                                                     | 0.343                    |
| Dsa     | 0.399                    | Woody Savannas                                               | 0.151                    |
| As      | 0.291                    | Mixed Forests                                                | 0.114                    |
| Dwb     | 0.279                    | Evergreen Needleleaf Forests                                 | 0.097                    |
| Cwc     | 0.237                    | Deciduous Broadleaf Forests                                  | 0.020                    |
| Dsc     | 0.090                    | Closed Shrublands                                            | 0.007                    |
| EF      | 0.007                    |                                                              |                          |
| Csc     | 0.006                    |                                                              |                          |
| Cfc     | 0.004                    |                                                              |                          |

## 2 Frequency distribution of cell-level likelihoods and trends

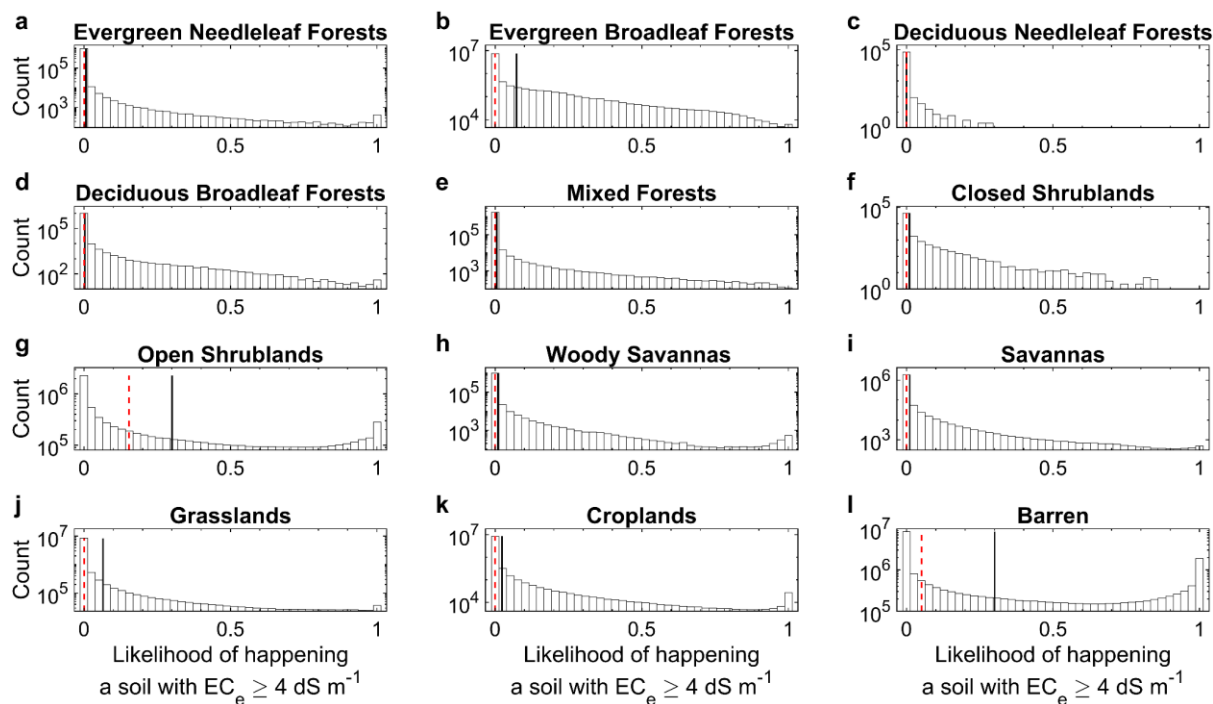

**Figure S8: Frequency distribution of the cell-level likelihood of soils with an  $EC_e \geq 4 \text{ dS m}^{-1}$  between 1980 and 2018 at each land cover type.** Black and red dotted lines indicate the mean and median of predictions, respectively.

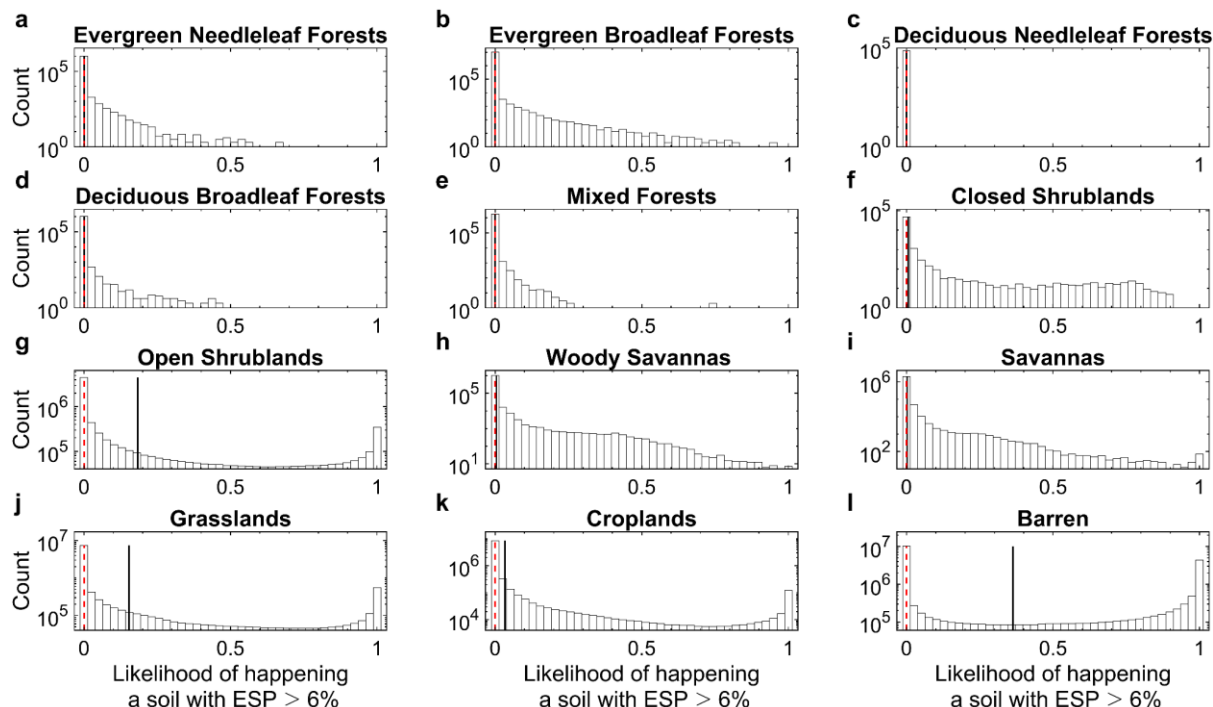

**Figure S9: Frequency distribution of the cell-level likelihood of soils with an  $ESP \geq 6\%$  between 1980 and 2018 at each land cover type.** Black and red dotted lines indicate the mean and median of predictions, respectively.

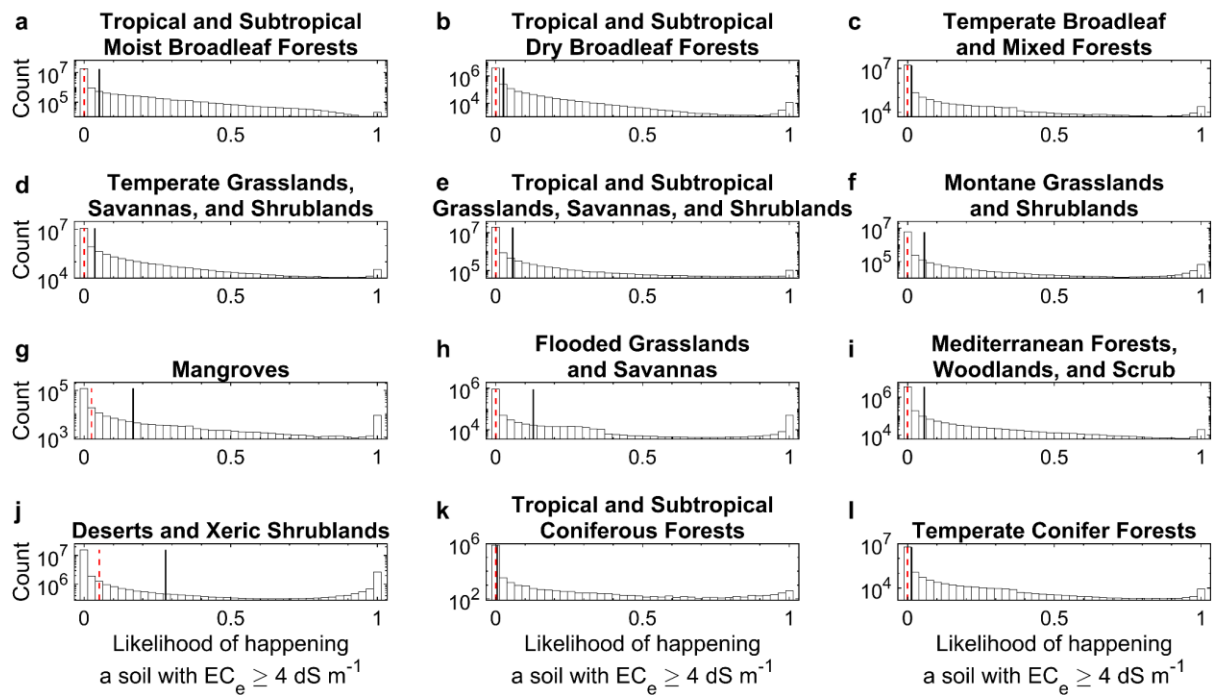

**Figure S10: Frequency distribution of the cell-level likelihood of soils with an  $EC_e \geq 4 \text{ dS m}^{-1}$  between 1980 and 2018 at each biome. Black and red dotted lines indicate the mean and median of predictions, respectively.**

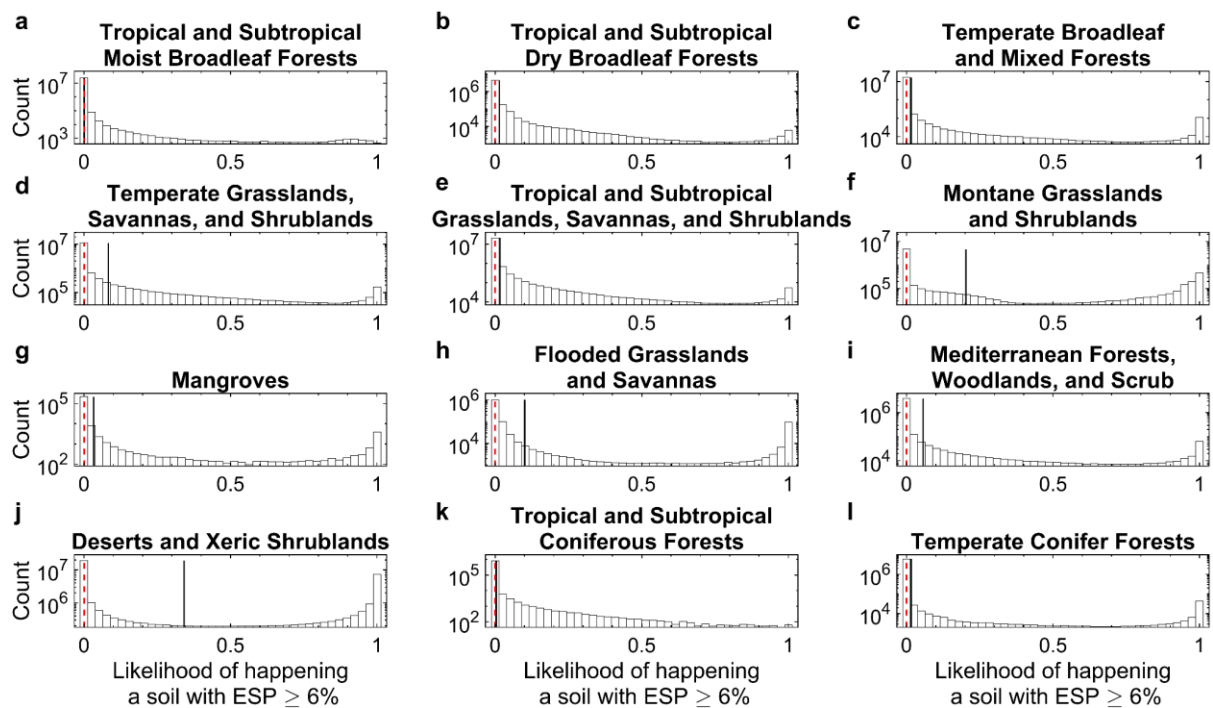

**Figure S11: Frequency distribution of the cell-level likelihood of soils with an  $ESP \geq 6\%$  between 1980 and 2018 at each biome. Black and red dotted lines indicate the mean and median of predictions, respectively.**

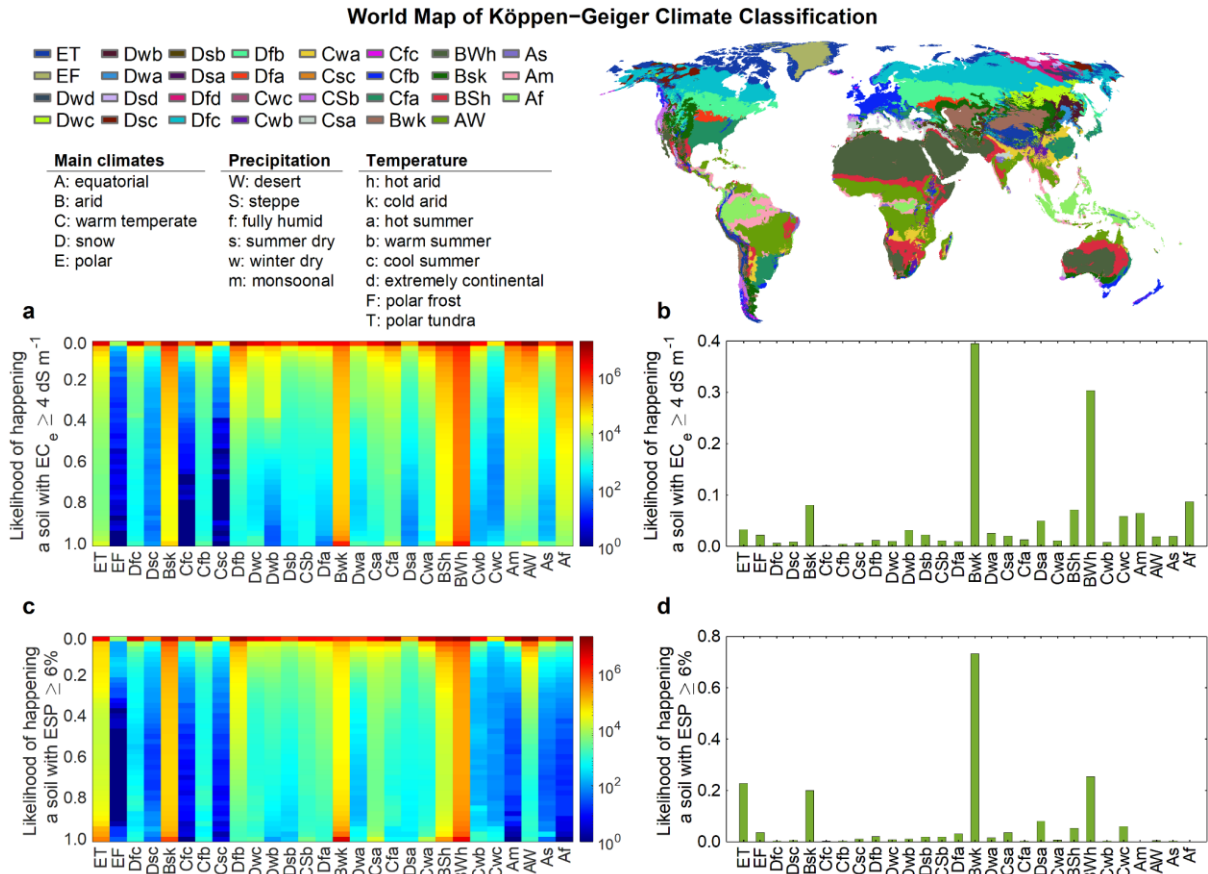

**Figure S12: Frequency distribution of the cell-level likelihood of salt-affected soils at each climate between 1980 and 2018. a and b, Soils with  $EC_e \geq 4 \text{ dS m}^{-1}$ . c and d, Soils with  $ESP \geq 6\%$ . Heat map charts show the count of data within each climate zone. Bar charts show the mean of likelihoods within each climate zone.**



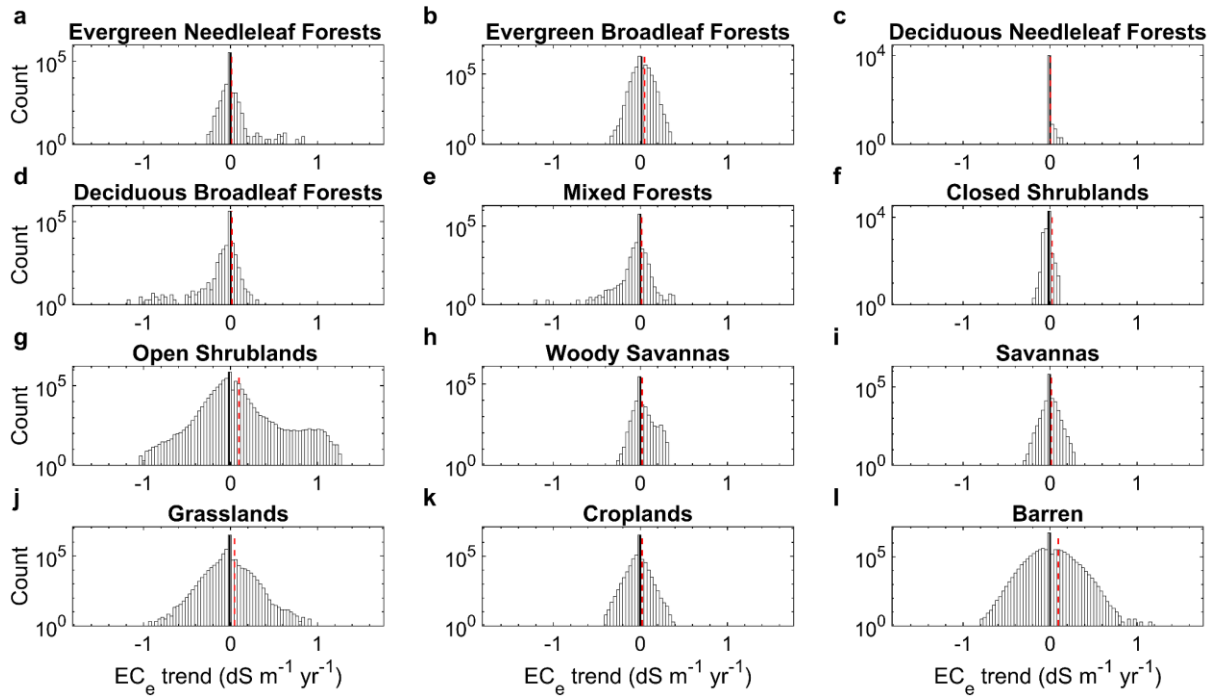

**Figure S13: Frequency distribution of the cell-level trends in variation of  $EC_e$  ( $p < 0.05$ ) between 1980 and 2018 for each land cover type. Black and red dotted lines indicate the mean and standard deviation of the calculated trends.**

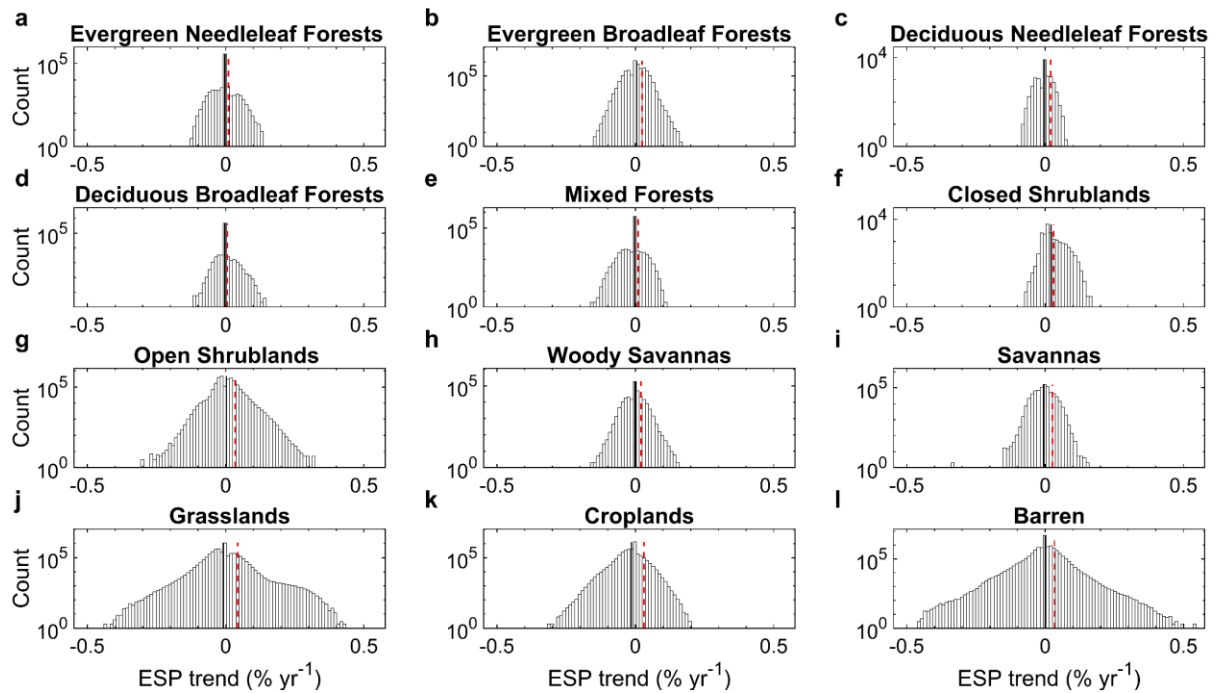

**Figure S14: Frequency distribution of the cell-level trends in variation of ESP ( $p < 0.05$ ) between 1980 and 2018 for each land cover type. Black and red dotted lines indicate the mean and standard deviation of the calculated trends.**

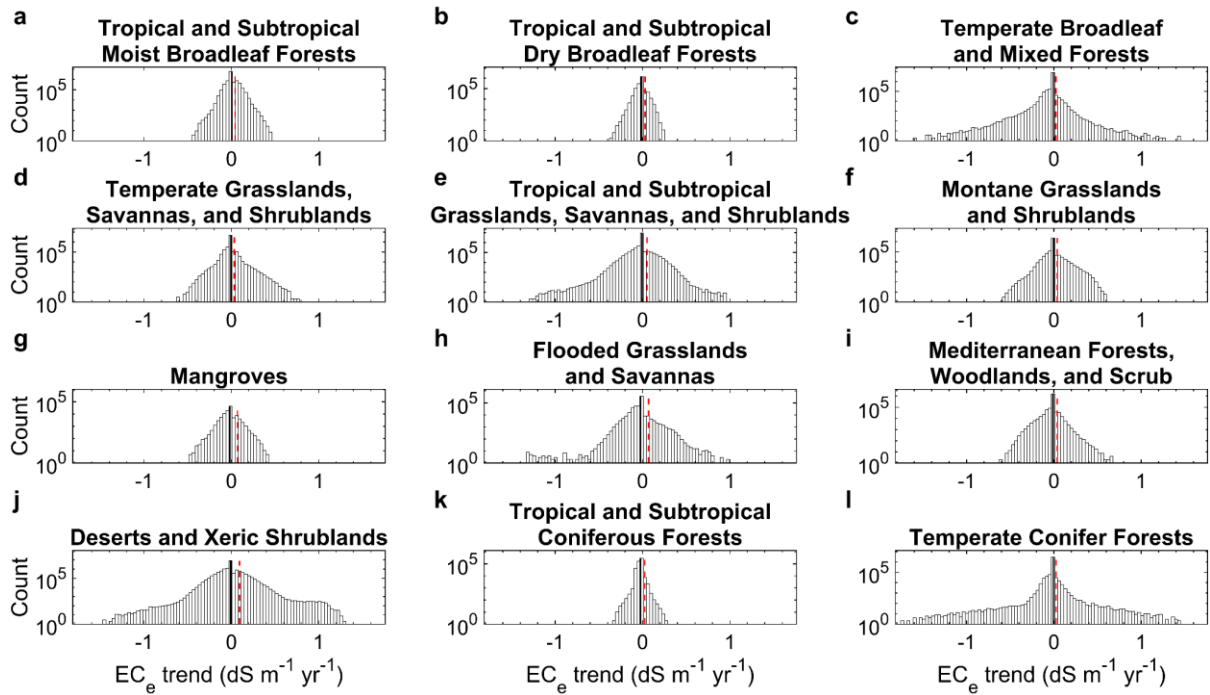

**Figure S15: Frequency distribution of the cell-level trends in variation of  $EC_e$  ( $p < 0.05$ ) between 1980 and 2018 for each biome. Black and red dotted lines indicate the mean and standard deviation of the calculated trends, respectively.**

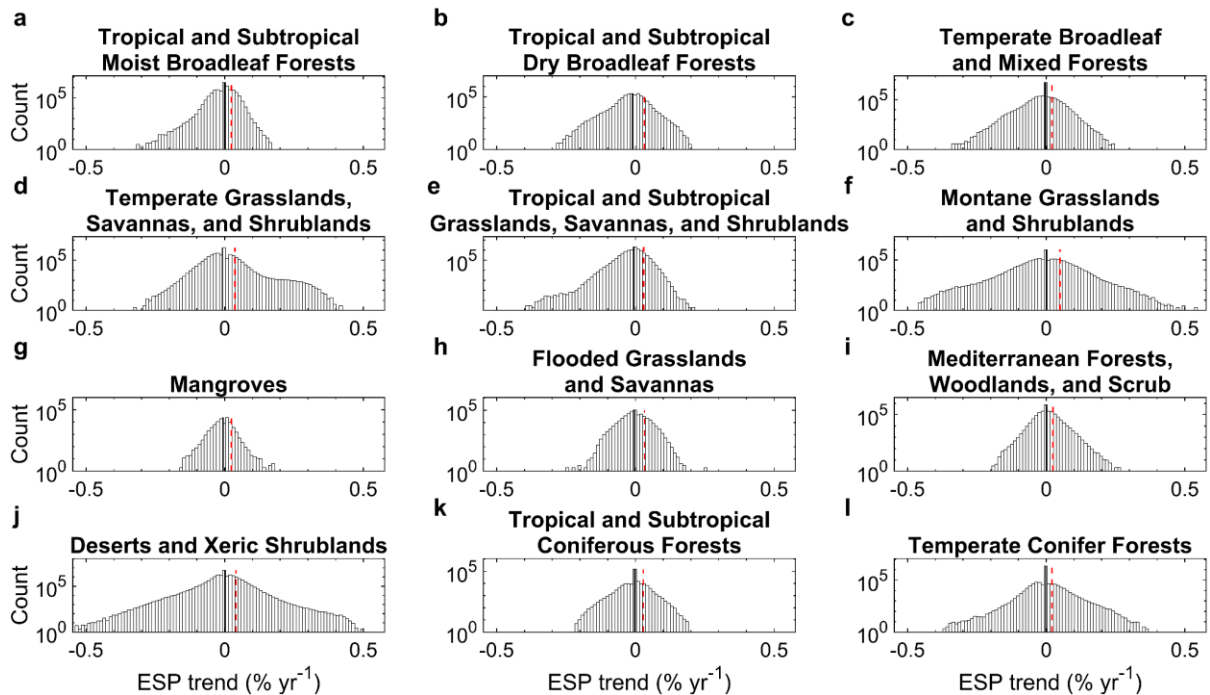

**Figure S16: Frequency distribution of the cell-level trends in variation of ESP ( $p < 0.05$ ) between 1980 and 2018 for each biome. Black and red dotted lines indicate the mean and standard deviation of the calculated trends, respectively.**

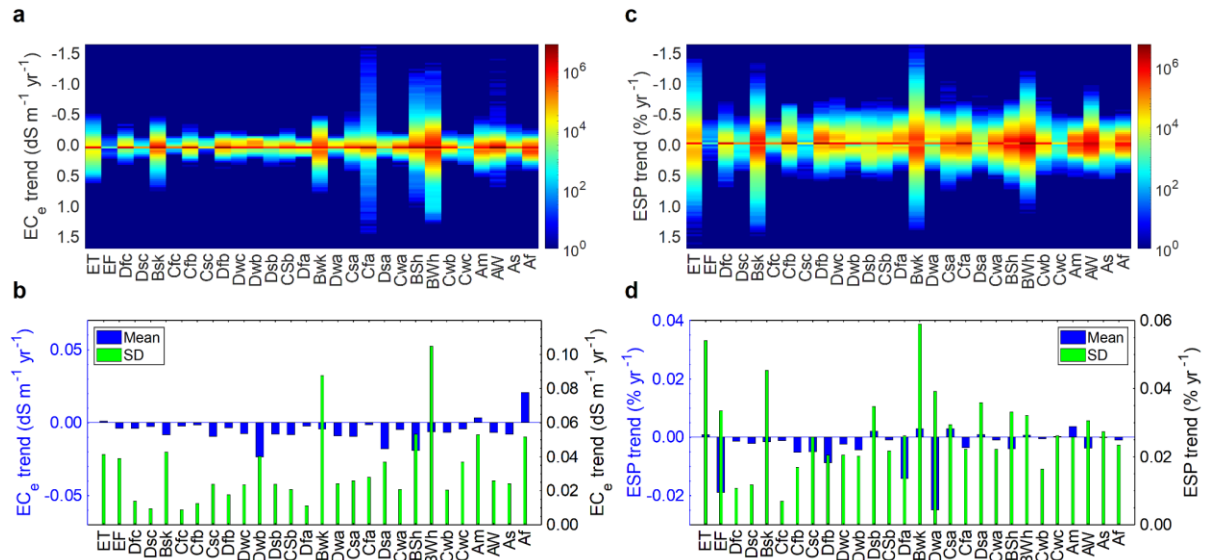

**Figure S17: Cell-level trends in variation of soil salinity and sodicity for each climate zone between 1980 and 2018 ( $p < 0.05$ ).** **a** and **b**, Frequency distribution, mean, and standard deviation (SD) of the cell-level trends in variation of  $EC_e$ . **c** and **d**, Frequency distribution, mean, and standard deviation of the cell-level trends in variation of ESP. Heat map charts show the count of data within each climate zone. See [Figure S12](#) for the full name of each climate zone.

### 3 Model training

**Table S5: The significance of predictors for classification and regression models over the training sets and saline-sodic classes.** Importance values are normalized between 0 and 1 and the higher the value, the more the significance. See [Table S1](#) for the full name of the predictors.

| Predictor                               | Min     | Max       | Mean     | Median   | Standard deviation | Importance for EC <sub>e</sub> |                     | Importance for ESP |                    |
|-----------------------------------------|---------|-----------|----------|----------|--------------------|--------------------------------|---------------------|--------------------|--------------------|
|                                         |         |           |          |          |                    | Classification                 | Regression (saline) | Classification     | Regression (sodic) |
| Sample's upper depth                    | 0.00    | 3,277.00  | 60.78    | 41.00    | 88.52              | 0.837                          | 0.287               | 0.559              | 0.450              |
| Sample's lower depth                    | 0.00    | 3,292.00  | 86.54    | 66.00    | 95.66              | 1.000                          | 0.669               | 0.641              | 0.519              |
| Elevation                               | -315.00 | 5,158.00  | 595.06   | 310.00   | 643.58             | 0.216                          | 0.239               | 0.298              | 0.157              |
| Plan curvature                          | -0.34   | 0.33      | 0.00     | 0.00     | 0.02               | 0.253                          | 0.071               | 0.186              | 0.081              |
| Profile curvature                       | -0.31   | 0.39      | 0.00     | 0.00     | 0.02               | 0.269                          | 0.213               | 0.285              | 0.137              |
| Slope                                   | 0.00    | 70.00     | 6.58     | 3.00     | 9.16               | 0.064                          | 0.154               | 0.156              | 0.056              |
| Slope length                            | 0.00    | 75,083.30 | 1,007.75 | 0.00     | 2,286.11           | 0.080                          | 0.000               | 0.047              | 0.023              |
| TRI                                     | 0.00    | 471.04    | 23.54    | 11.95    | 34.69              | 0.235                          | 0.219               | 0.235              | 0.137              |
| Fertilizer input for C3 annual crops    | 0.00    | 329.87    | 70.06    | 81.09    | 25.80              | 0.000                          | 0.320               | 0.000              | 0.012              |
| Fertilizer input for C3 perennial crops | 0.00    | 415.51    | 36.87    | 0.00     | 70.47              | 0.011                          | 0.071               | 0.000              | 0.000              |
| Water table depth                       | 0.00    | 466.07    | 23.75    | 13.43    | 32.18              | 0.244                          | 0.140               | 0.171              | 0.110              |
| Aspect                                  | 0.00    | 359.00    | 178.64   | 180.00   | 106.01             | 0.293                          | 0.277               | 0.186              | 0.081              |
| Topographic index                       | -1.85   | 19.91     | 6.17     | 5.95     | 2.29               | 0.318                          | 0.127               | 0.186              | 0.069              |
| Soil clay content                       | 0.00    | 90.00     | 23.11    | 21.00    | 11.80              | 0.347                          | 0.568               | 0.217              | 0.168              |
| Soil silt content                       | 0.00    | 82.00     | 40.12    | 40.00    | 17.92              | 0.166                          | 0.077               | 0.204              | 0.094              |
| Soil sand content                       | 0.00    | 98.00     | 36.74    | 34.00    | 19.85              | 0.167                          | 0.274               | 0.189              | 0.096              |
| Soil-sedimentary thickness              | 0.00    | 50.00     | 18.36    | 5.00     | 20.79              | 0.066                          | 0.017               | 0.068              | 0.030              |
| Average rooting depth                   | 0.40    | 4.50      | 1.38     | 1.20     | 0.51               | 0.067                          | 0.186               | 0.106              | 0.062              |
| WRB soil classes                        | -       | -         | -        | -        | -                  | 0.996                          | 0.563               | 1.000              | 1.000              |
| Parent material classes                 | -       | -         | -        | -        | -                  | 0.146                          | 0.177               | 0.112              | 0.044              |
| Diurnal temperature range               | 4.99    | 21.00     | 12.87    | 12.43    | 2.17               | 0.241                          | 0.263               | 0.304              | 0.135              |
| Precipitation                           | 0.84    | 4,475.21  | 897.53   | 966.85   | 423.09             | 0.201                          | 0.240               | 0.291              | 0.145              |
| Average temperature                     | -5.17   | 29.76     | 14.06    | 13.47    | 5.84               | 0.107                          | 0.101               | 0.247              | 0.112              |
| Maximum temperature                     | 2.16    | 37.19     | 20.52    | 19.77    | 5.80               | 0.123                          | 0.158               | 0.252              | 0.100              |
| Minimum temperature                     | -12.64  | 24.13     | 7.64     | 7.29     | 6.09               | 0.117                          | 0.092               | 0.201              | 0.077              |
| Root-zone soil moisture                 | 0.00    | 510.98    | 68.98    | 65.17    | 57.09              | 0.209                          | 0.094               | 0.263              | 0.117              |
| PDSI                                    | -6.37   | 7.64      | 0.32     | 0.26     | 1.47               | 0.387                          | 0.024               | 0.271              | 0.101              |
| Soil surface moisture (2-5 cm)          | 0.04    | 0.39      | 0.24     | 0.25     | 0.06               | 0.287                          | 0.207               | 0.300              | 0.161              |
| Evaporative stress factor               | 0.00    | 1.00      | 0.77     | 0.86     | 0.20               | 0.231                          | 0.314               | 0.169              | 0.073              |
| EVI2                                    | -0.0737 | 0.5721    | 0.2849   | 0.3035   | 0.0962             | 0.284                          | 0.240               | 0.230              | 0.112              |
| NDVI                                    | -0.2149 | 0.8877    | 0.4843   | 0.5167   | 0.1610             | 0.187                          | 0.099               | 0.165              | 0.078              |
| FAPAR                                   | 0.0005  | 0.8560    | 0.4059   | 0.4272   | 0.1327             | 0.191                          | 1.000               | 0.404              | 0.215              |
| LAI                                     | 0.0009  | 5.6356    | 1.2700   | 1.2189   | 0.7138             | 0.160                          | 0.065               | 0.229              | 0.128              |
| Wind speed                              | 0.84    | 7.13      | 3.14     | 3.08     | 0.81               | 0.293                          | 0.118               | 0.317              | 0.143              |
| Soil surface (skin) temperature         | 263.94  | 306.81    | 287.46   | 286.73   | 6.29               | 0.080                          | 0.208               | 0.290              | 0.127              |
| Soil's layer one temperature            | 270.27  | 307.15    | 288.00   | 286.61   | 5.93               | 0.061                          | 0.187               | 0.271              | 0.122              |
| Soil's layer two temperature            | 270.01  | 306.84    | 287.91   | 286.52   | 5.88               | 0.030                          | 0.420               | 0.359              | 0.150              |
| Soil's layer three temperature          | 269.92  | 306.68    | 287.90   | 286.52   | 5.86               | 0.005                          | 0.396               | 0.348              | 0.169              |
| Soil's layer four temperature           | 269.79  | 306.35    | 287.90   | 286.57   | 5.85               | 0.034                          | 0.593               | 0.334              | 0.160              |
| Potential evapotranspiration            | 330.80  | 2,450.19  | 1,205.92 | 1,148.09 | 280.03             | 0.187                          | 0.116               | 0.338              | 0.164              |
| Water deficit                           | 0.00    | 2,435.30  | 503.90   | 285.81   | 442.76             | 0.201                          | 0.343               | 0.264              | 0.110              |
| Actual evapotranspiration               | 0.00    | 1,807.37  | 704.41   | 750.90   | 274.72             | 0.287                          | 0.011               | 0.279              | 0.145              |
| Land cover classes                      | -       | -         | -        | -        | -                  | 0.306                          | 0.057               | 0.178              | 0.095              |

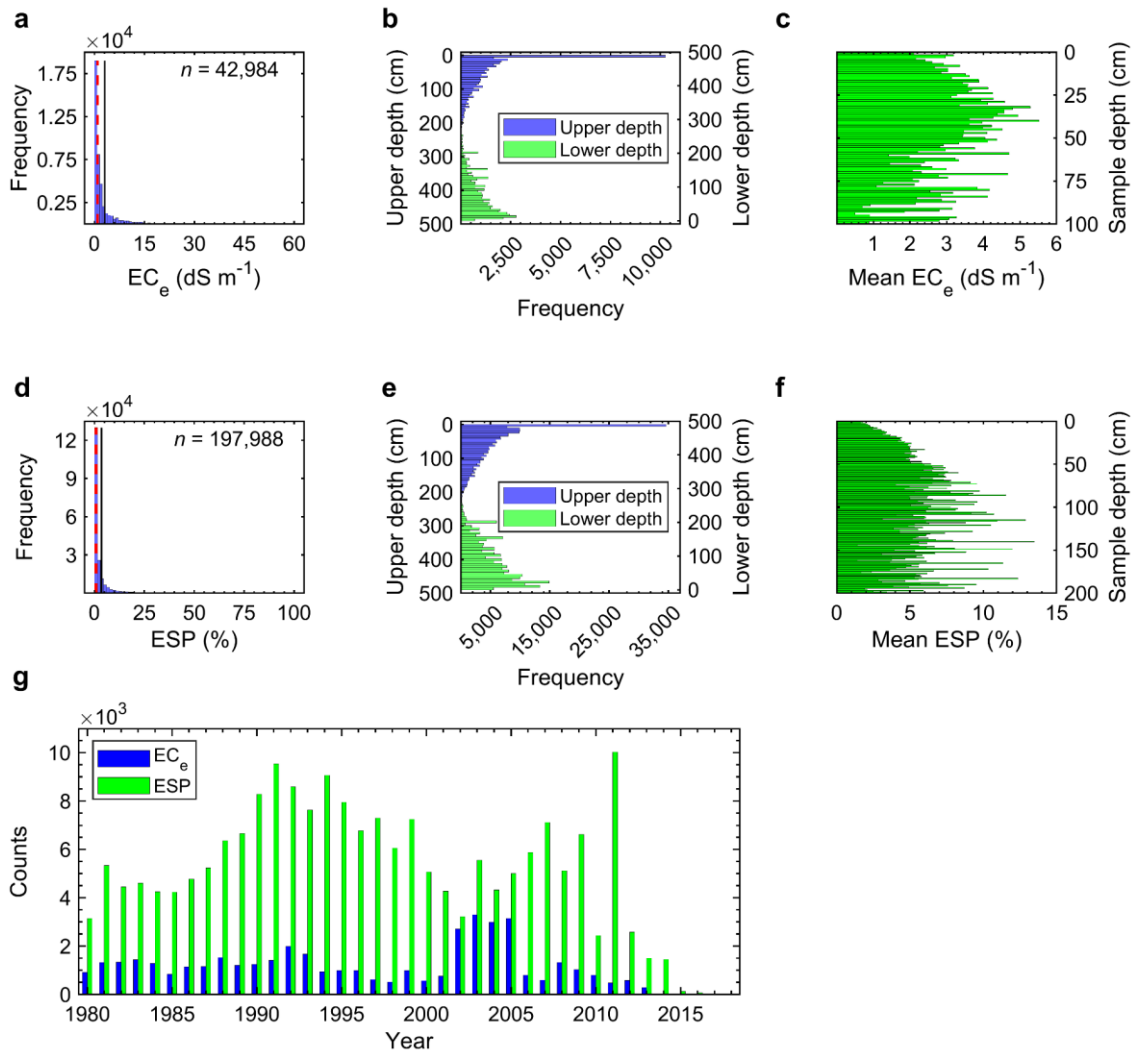

**Figure S18: Frequency distribution of the input training data.** **a** and **d**, Histograms of the measured values of  $EC_e$  and ESP used for training the two-part models, respectively. Black and red dotted lines represent the mean and median of data, respectively. **b**, Histograms of the lower and upper depths for measured  $EC_e$  samples used in the training set. **c**, Frequency distribution of the measured  $EC_e$  values versus depth. **e**, Histograms of the lower and upper depths for measured ESP samples used in the training set. **f**, Frequency distribution of the measured ESP values versus depth. **g**, Number of measured samples per year used in training process of the two-part models.

**Table S6: Speed, interpretability, and flexibility of MATLAB built-in classification and regression ML algorithms for training different parts of the two-part predictive models.** Information on the interpretability and flexibility are adopted from the MATALB ML toolbox user guide.

| Classifier              |                     | EC <sub>c</sub> classification |                   | ESP classification |                   | Interpretability          | Flexibility    |      |                   |                  |                |
|-------------------------|---------------------|--------------------------------|-------------------|--------------------|-------------------|---------------------------|----------------|------|-------------------|------------------|----------------|
|                         |                     | Accuracy (%)                   | Training time (s) | Accuracy (%)       | Training time (s) |                           |                |      |                   |                  |                |
| Tree                    | Fine                | 74.3                           | 9                 | 68.8               | 15                | Easy                      | High           |      |                   |                  |                |
|                         | Medium              | 72.1                           | 8                 | 66.5               | 13                | Easy                      | Medium         |      |                   |                  |                |
|                         | Coarse              | 67.7                           | 7                 | 64.0               | 10                | Easy                      | Low            |      |                   |                  |                |
| Logistic Regression     |                     | 72.1                           | 86                | 68.2               | 480               | Easy                      | Low            |      |                   |                  |                |
| Naive Bayes             | Gaussian Naive      | 56.6                           | 9                 | 64.3               | 12                | Easy                      | Low            |      |                   |                  |                |
|                         | Kernel Naive        | 71.2                           | 487               | 64.9               | 8,240             | Easy                      | Medium         |      |                   |                  |                |
| Support Vector Machines | Linear              | 71.2                           | 406               | 67.8               | 13,277            | Easy                      | Low            |      |                   |                  |                |
|                         | Quadratic           | 80.1                           | 838               | 73.4               | 58,762            | Hard                      | Medium         |      |                   |                  |                |
|                         | Cubic               | 85.7                           | 1,897             | 78.6               | 77,690            | Hard                      | Medium         |      |                   |                  |                |
|                         | Fine Gaussian       | 87.0                           | 789               | 83.8               | 19,325            | Hard                      | High           |      |                   |                  |                |
|                         | Medium Gaussian     | 81.2                           | 283               | 76.2               | 13,408            | Hard                      | Medium         |      |                   |                  |                |
|                         | Coarse Gaussian     | 72.4                           | 315               | 69.2               | 10,044            | Hard                      | Low            |      |                   |                  |                |
| Ensemble                | Boosted Trees       | 75.2                           | 35                | 69.6               | 160               | Hard                      | Medium to high |      |                   |                  |                |
|                         | Bagged Trees        | 88.6                           | 31                | 84.2               | 176               | Hard                      | High           |      |                   |                  |                |
|                         | RUSBoosted Trees    | 69.6                           | 31                | 66.4               | 204               | Hard                      | Medium         |      |                   |                  |                |
| Regression Model        |                     | EC <sub>c</sub> Regression     |                   |                    |                   | ESP Regression            |                |      |                   | Interpretability | Flexibility    |
|                         |                     | RMSE                           | NSE               | MAE                | Training time (s) | RMSE                      | NSE            | MAE  | Training time (s) |                  |                |
| Linear                  | Linear              | 0.30                           | 0.33              | 0.24               | 11                | 0.39                      | 0.25           | 0.31 | 16                | Easy             | Very low       |
|                         | Interaction         | 53.83                          | < 0               | 6.13               | 445               | 0.49                      | < 0            | 0.27 | 4,597             | Easy             | Low            |
|                         | Robust              | 0.30                           | 0.32              | 0.23               | 24                | 0.39                      | 0.24           | 0.31 | 149               | Easy             | Very low       |
|                         | Stepwise            | Not completed in 24 hours      |                   |                    |                   | Not completed in 24 hours |                |      |                   | Easy             | Low            |
| Tree                    | Fine                | 0.25                           | 0.53              | 0.17               | 7                 | 0.34                      | 0.44           | 0.24 | 106               | Easy             | High           |
|                         | Medium              | 0.26                           | 0.51              | 0.18               | 6                 | 0.34                      | 0.44           | 0.25 | 18                | Easy             | Medium         |
|                         | Coarse              | 0.27                           | 0.45              | 0.20               | 5                 | 0.35                      | 0.41           | 0.26 | 11                | Easy             | Low            |
| Support Vector Machines | Linear              | 0.31                           | 0.29              | 0.24               | 57                | 0.40                      | 0.22           | 0.30 | 2,627             | Easy             | Low            |
|                         | Quadratic           | 0.26                           | 0.49              | 0.19               | 133               | 0.36                      | 0.37           | 0.27 | 7,905             | Hard             | Medium         |
|                         | Cubic               | 0.27                           | 0.45              | 0.17               | 415               | 0.34                      | 0.42           | 0.23 | 27,237            | Hard             | Medium         |
|                         | Fine Gaussian       | 0.22                           | 0.65              | 0.15               | 62                | 0.27                      | 0.65           | 0.19 | 3,711             | Hard             | High           |
|                         | Medium Gaussian     | 0.25                           | 0.53              | 0.18               | 51                | 0.33                      | 0.47           | 0.24 | 2,495             | Hard             | Medium         |
|                         | Coarse Gaussian     | 0.31                           | 0.27              | 0.24               | 47                | 0.38                      | 0.28           | 0.29 | 2,182             | Hard             | Low            |
| Ensemble                | Boosted Trees       | 0.28                           | 0.41              | 0.22               | 11                | 0.37                      | 0.31           | 0.29 | 53                | Hard             | Medium to high |
|                         | Bagged Trees        | 0.22                           | 0.64              | 0.16               | 17                | 0.27                      | 0.63           | 0.20 | 104               | Hard             | High           |
| Gaussian                | Squared Exponential | 0.23                           | 0.61              | 0.17               | 2,155             | Not completed in 24 hours |                |      |                   | Hard             | Automatic      |
|                         | Matern 5/2          | 0.24                           | 0.57              | 0.15               | 26,648            | Ditto                     |                |      |                   | Hard             | Automatic      |
|                         | Exponential         | 0.20                           | 0.69              | 0.14               | 3,393             | Ditto                     |                |      |                   | Hard             | Automatic      |
|                         | Rational Quadratic  | 0.20                           | 0.70              | 0.14               | 3,319             | Ditto                     |                |      |                   | Hard             | Automatic      |

**Table S7: Tuned hyperparameters and accuracy metrics for 30 classification models fitted to the EC<sub>e</sub> training set.** The model with best *MCC* (Mathew’s Correlation Coefficient) was chosen for using in the final predictive two-part model of salinity.

| EC <sub>e</sub> classification |                           |            |                   |                          |                               |                        |                      |              |           |        |            |            |
|--------------------------------|---------------------------|------------|-------------------|--------------------------|-------------------------------|------------------------|----------------------|--------------|-----------|--------|------------|------------|
| No.                            | Number of learning cycles | Learn rate | Minimum leaf size | Maximum number of splits | Number of variables to sample | Binomial deviance loss | Classification error | Accuracy (%) | Precision | Recall | <i>MCC</i> | <i>MOF</i> |
| 1                              | 23                        | 0.266      | 3                 | 1,703                    | -                             | 0.192                  | 0.117                | 89.298       | 0.925     | 0.914  | 0.761      | 0.114      |
| 2                              | 98                        | 0.385      | 71                | 825                      | -                             | 0.187                  | 0.116                | 89.545       | 0.925     | 0.918  | 0.766      | 0.114      |
| 3                              | 107                       | -          | 1                 | 25,989                   | 10                            | 0.226                  | 0.117                | 88.814       | 0.931     | 0.899  | 0.754      | 0.117      |
| 4                              | 11                        | 0.532      | 4                 | 1,256                    | -                             | 0.203                  | 0.128                | 87.954       | 0.921     | 0.896  | 0.733      | 0.120      |
| 5                              | 10                        | 0.008      | 7                 | 3,541                    | -                             | 0.306                  | 0.138                | 85.881       | 0.931     | 0.852  | 0.701      | 0.152      |
| 6                              | 21                        | 0.963      | 1                 | 1,020                    | -                             | 0.191                  | 0.125                | 88.949       | 0.916     | 0.918  | 0.751      | 0.119      |
| 7                              | 18                        | -          | 2                 | 26,939                   | 5                             | 0.227                  | 0.122                | 88.177       | 0.929     | 0.890  | 0.741      | 0.122      |
| 8                              | 21                        | 0.216      | 1                 | 16,529                   | -                             | 0.190                  | 0.122                | 89.352       | 0.917     | 0.924  | 0.760      | 0.117      |
| 9                              | 96                        | 0.477      | 7                 | 18,762                   | -                             | 0.135                  | 0.121                | 89.082       | 0.920     | 0.915  | 0.755      | 0.115      |
| 10                             | 99                        | -          | 1                 | 2,338                    | 10                            | 0.227                  | 0.116                | 88.763       | 0.934     | 0.895  | 0.754      | 0.117      |
| 11                             | 44                        | 0.077      | 4                 | 32,789                   | -                             | 0.193                  | 0.120                | 89.287       | 0.920     | 0.919  | 0.759      | 0.114      |
| 12                             | 44                        | 0.607      | 6                 | 22,169                   | -                             | 0.190                  | 0.121                | 89.471       | 0.916     | 0.926  | 0.762      | 0.110      |
| 13                             | 50                        | 0.474      | 21                | 2,664                    | -                             | 0.187                  | 0.117                | 89.650       | 0.921     | 0.924  | 0.767      | 0.109      |
| 14                             | 15                        | -          | 3                 | 27,232                   | 5                             | 0.227                  | 0.123                | 88.086       | 0.930     | 0.888  | 0.740      | 0.131      |
| 15                             | 74                        | 0.028      | 6                 | 24,562                   | -                             | 0.196                  | 0.121                | 88.424       | 0.929     | 0.895  | 0.746      | 0.120      |
| 16                             | 67                        | -          | 1                 | 38,908                   | 3                             | 0.227                  | 0.118                | 88.579       | 0.933     | 0.893  | 0.750      | 0.124      |
| 17                             | 19                        | 0.703      | 11                | 24,248                   | -                             | 0.192                  | 0.126                | 88.842       | 0.915     | 0.918  | 0.749      | 0.120      |
| 18                             | 34                        | -          | 1                 | 17,420                   | 3                             | 0.226                  | 0.118                | 88.582       | 0.932     | 0.894  | 0.750      | 0.118      |
| 19                             | 12                        | -          | 2                 | 27,493                   | 4                             | 0.227                  | 0.128                | 87.621       | 0.926     | 0.885  | 0.729      | 0.130      |
| 20                             | 39                        | 0.444      | 5                 | 684                      | -                             | 0.196                  | 0.118                | 88.945       | 0.928     | 0.904  | 0.755      | 0.115      |
| 21                             | 50                        | 0.191      | 16                | 11,886                   | -                             | 0.189                  | 0.119                | 89.352       | 0.922     | 0.918  | 0.761      | 0.113      |
| 22                             | 64                        | 0.281      | 180               | 1,308                    | -                             | 0.284                  | 0.117                | 88.128       | 0.940     | 0.877  | 0.745      | 0.130      |
| 23                             | 63                        | -          | 1                 | 2,615                    | 30                            | 0.226                  | 0.117                | 88.849       | 0.931     | 0.899  | 0.755      | 0.117      |
| 24                             | 44                        | -          | 2                 | 8,278                    | 11                            | 0.226                  | 0.119                | 88.438       | 0.932     | 0.892  | 0.747      | 0.123      |
| 25                             | 89                        | 0.904      | 2                 | 154                      | -                             | 0.199                  | 0.121                | 88.400       | 0.930     | 0.893  | 0.746      | 0.114      |
| 26                             | 12                        | 0.640      | 13                | 8,186                    | -                             | 0.195                  | 0.129                | 88.293       | 0.916     | 0.907  | 0.738      | 0.121      |
| 27                             | 10                        | 0.422      | 1                 | 22,855                   | -                             | 0.193                  | 0.126                | 88.854       | 0.916     | 0.917  | 0.749      | 0.120      |
| 28                             | 12                        | 0.764      | 1                 | 36,342                   | -                             | 0.194                  | 0.128                | 88.877       | 0.912     | 0.922  | 0.749      | 0.121      |
| 29                             | 45                        | 0.481      | 4                 | 2,039                    | -                             | 0.136                  | 0.124                | 88.812       | 0.919     | 0.913  | 0.749      | 0.116      |
| 30                             | 41                        | 0.142      | 1                 | 2,261                    | -                             | 0.145                  | 0.119                | 89.026       | 0.925     | 0.909  | 0.756      | 0.115      |

**Table S8: Tuned hyperparameters and accuracy metrics for 30 regression models fitted to the non-saline class ( $EC_e < 2 \text{ dS m}^{-1}$ ). The model with best *NSE* (Nash-Sutcliffe model efficiency coefficient) was chosen for using in the final predictive two-part model of salinity.**

| EC <sub>e</sub> regression non-saline |                           |            |                   |                          |                               |            |           |           |       |       |       |                       |
|---------------------------------------|---------------------------|------------|-------------------|--------------------------|-------------------------------|------------|-----------|-----------|-------|-------|-------|-----------------------|
| No.                                   | Number of learning cycles | Learn rate | Minimum leaf size | Maximum number of splits | Number of variables to sample | RMSE (log) | MAE (log) | NSE (log) | RMSE  | MAE   | NSE   | MOF × 10 <sup>4</sup> |
| 1                                     | 50                        | 0.094      | 19                | 13,701                   | 9                             | 0.069      | 0.049     | 0.718     | 0.294 | 0.193 | 0.647 | 50.85                 |
| 2                                     | 110                       | 0.034      | 1                 | 7,603                    | 10                            | 0.070      | 0.047     | 0.714     | 0.296 | 0.188 | 0.644 | 50.35                 |
| 3                                     | 206                       | 0.053      | 9                 | 18,769                   | 7                             | 0.069      | 0.048     | 0.720     | 0.292 | 0.191 | 0.652 | 48.93                 |
| 4                                     | 29                        | 0.224      | 10                | 20,978                   | 16                            | 0.070      | 0.048     | 0.710     | 0.297 | 0.191 | 0.642 | 50.97                 |
| 5                                     | 92                        | 0.077      | 2                 | 862                      | 39                            | 0.068      | 0.047     | 0.725     | 0.290 | 0.187 | 0.658 | 49.39                 |
| 6                                     | 60                        | 0.206      | 3                 | 701                      | 42                            | 0.068      | 0.047     | 0.727     | 0.289 | 0.188 | 0.659 | 50.13                 |
| 7                                     | 155                       | 0.035      | 24                | 6,852                    | 19                            | 0.068      | 0.048     | 0.727     | 0.290 | 0.188 | 0.657 | 48.24                 |
| 8                                     | 66                        | 0.067      | 1                 | 18,230                   | 9                             | 0.069      | 0.047     | 0.718     | 0.295 | 0.186 | 0.646 | 49.72                 |
| 9                                     | 28                        | 0.134      | 6                 | 9,724                    | 8                             | 0.069      | 0.048     | 0.720     | 0.294 | 0.189 | 0.648 | 50.03                 |
| 10                                    | 59                        | 0.068      | 4                 | 11,243                   | 7                             | 0.069      | 0.046     | 0.723     | 0.292 | 0.185 | 0.653 | 48.35                 |
| 11                                    | 21                        | 0.196      | 1                 | 18,079                   | 5                             | 0.074      | 0.050     | 0.680     | 0.310 | 0.198 | 0.609 | 51.51                 |
| 12                                    | 127                       | 0.035      | 27                | 2,023                    | 18                            | 0.069      | 0.049     | 0.718     | 0.295 | 0.193 | 0.646 | 50.44                 |
| 13                                    | 56                        | 0.066      | 3                 | 23,331                   | 8                             | 0.069      | 0.046     | 0.723     | 0.292 | 0.184 | 0.652 | 49.12                 |
| 14                                    | 28                        | 0.133      | 16                | 23,402                   | 17                            | 0.070      | 0.048     | 0.711     | 0.296 | 0.190 | 0.642 | 49.37                 |
| 15                                    | 71                        | 0.063      | 6                 | 17,945                   | 10                            | 0.068      | 0.046     | 0.725     | 0.291 | 0.185 | 0.654 | 49.60                 |
| 16                                    | 58                        | 0.114      | 1                 | 517                      | 16                            | 0.071      | 0.050     | 0.705     | 0.298 | 0.196 | 0.637 | 49.54                 |
| 17                                    | 33                        | 0.151      | 2                 | 18,453                   | 8                             | 0.070      | 0.050     | 0.712     | 0.297 | 0.198 | 0.640 | 48.50                 |
| 18                                    | 45                        | 0.077      | 5                 | 1,993                    | 26                            | 0.069      | 0.047     | 0.719     | 0.294 | 0.187 | 0.647 | 48.86                 |
| 19                                    | 180                       | 0.070      | 31                | 21,983                   | 11                            | 0.069      | 0.048     | 0.723     | 0.292 | 0.190 | 0.652 | 48.16                 |
| 20                                    | 80                        | 0.072      | 8                 | 23,408                   | 8                             | 0.068      | 0.047     | 0.727     | 0.289 | 0.186 | 0.659 | 47.63                 |
| 21                                    | 50                        | 0.088      | 2                 | 21,229                   | 16                            | 0.070      | 0.047     | 0.709     | 0.298 | 0.188 | 0.637 | 51.21                 |
| 22                                    | 44                        | 0.242      | 14                | 242                      | 20                            | 0.069      | 0.047     | 0.724     | 0.291 | 0.188 | 0.656 | 50.46                 |
| 23                                    | 80                        | 0.037      | 6                 | 10,144                   | 15                            | 0.069      | 0.047     | 0.718     | 0.297 | 0.187 | 0.640 | 50.11                 |
| 24                                    | 110                       | 0.154      | 1                 | 18,459                   | 4                             | 0.071      | 0.047     | 0.707     | 0.299 | 0.189 | 0.636 | 51.77                 |
| 25                                    | 109                       | 0.101      | 10                | 7,701                    | 14                            | 0.069      | 0.047     | 0.722     | 0.291 | 0.187 | 0.654 | 48.91                 |
| 26                                    | 22                        | 0.201      | 7                 | 6,285                    | 31                            | 0.071      | 0.048     | 0.706     | 0.298 | 0.192 | 0.637 | 51.01                 |
| 27                                    | 176                       | 0.091      | 1                 | 19,052                   | 6                             | 0.070      | 0.046     | 0.715     | 0.294 | 0.185 | 0.647 | 51.41                 |
| 28                                    | 84                        | 0.047      | 13                | 4,221                    | 5                             | 0.071      | 0.051     | 0.703     | 0.300 | 0.201 | 0.632 | 50.12                 |
| 29                                    | 90                        | 0.118      | 31                | 553                      | 12                            | 0.071      | 0.048     | 0.703     | 0.304 | 0.193 | 0.624 | 50.92                 |
| 30                                    | 18                        | 0.209      | 4                 | 25,273                   | 6                             | 0.070      | 0.048     | 0.713     | 0.297 | 0.191 | 0.640 | 51.00                 |



**Table S9: Tuned hyperparameters and accuracy metrics for 30 regression models fitted to the saline class ( $EC_e \geq 2 \text{ dS m}^{-1}$ ). The model with best *NSE* was chosen for using in the final predictive two-part model of salinity.**

| EC <sub>e</sub> Regression saline |                           |            |                   |                          |                               |            |           |           |       |       |       |                       |
|-----------------------------------|---------------------------|------------|-------------------|--------------------------|-------------------------------|------------|-----------|-----------|-------|-------|-------|-----------------------|
| No.                               | Number of learning cycles | Learn rate | Minimum leaf size | Maximum number of splits | Number of variables to sample | RMSE (log) | MAE (log) | NSE (log) | RMSE  | MAE   | NSE   | MOF × 10 <sup>4</sup> |
| 1                                 | 144                       | 0.235      | 8                 | 7,380                    | 1                             | 0.193      | 0.134     | 0.728     | 5.223 | 2.560 | 0.713 | 391.75                |
| 2                                 | 366                       | 0.046      | 3                 | 9,365                    | 1                             | 0.187      | 0.127     | 0.747     | 5.119 | 2.451 | 0.725 | 367.26                |
| 3                                 | 59                        | 0.075      | 6                 | 8,900                    | 9                             | 0.191      | 0.131     | 0.735     | 5.423 | 2.551 | 0.691 | 384.33                |
| 4                                 | 140                       | 0.043      | 7                 | 14,179                   | 3                             | 0.188      | 0.129     | 0.742     | 5.299 | 2.526 | 0.705 | 364.09                |
| 5                                 | 229                       | 0.042      | 1                 | 1,812                    | 1                             | 0.189      | 0.128     | 0.741     | 5.168 | 2.472 | 0.719 | 360.28                |
| 6                                 | 107                       | 0.051      | 5                 | 903                      | 26                            | 0.189      | 0.129     | 0.741     | 5.214 | 2.507 | 0.714 | 369.81                |
| 7                                 | 52                        | 0.153      | 11                | 12,602                   | 3                             | 0.192      | 0.133     | 0.733     | 5.372 | 2.586 | 0.697 | 387.43                |
| 8                                 | 152                       | 0.145      | 13                | 219                      | 18                            | 0.189      | 0.132     | 0.741     | 5.172 | 2.522 | 0.719 | 370.23                |
| 9                                 | 103                       | 0.068      | 7                 | 6,004                    | 2                             | 0.189      | 0.129     | 0.741     | 5.231 | 2.508 | 0.713 | 373.13                |
| 10                                | 128                       | 0.040      | 1                 | 6,038                    | 12                            | 0.189      | 0.126     | 0.741     | 5.131 | 2.428 | 0.724 | 379.53                |
| 11                                | 45                        | 0.099      | 7                 | 13,238                   | 9                             | 0.192      | 0.132     | 0.731     | 5.436 | 2.579 | 0.690 | 385.47                |
| 12                                | 143                       | 0.187      | 38                | 9,795                    | 14                            | 0.190      | 0.132     | 0.736     | 5.245 | 2.549 | 0.711 | 379.96                |
| 13                                | 114                       | 0.045      | 1                 | 816                      | 27                            | 0.188      | 0.130     | 0.743     | 5.195 | 2.514 | 0.717 | 365.84                |
| 14                                | 110                       | 0.092      | 2                 | 367                      | 32                            | 0.190      | 0.131     | 0.738     | 5.247 | 2.529 | 0.711 | 378.18                |
| 15                                | 113                       | 0.035      | 4                 | 4,955                    | 20                            | 0.190      | 0.128     | 0.738     | 5.246 | 2.491 | 0.711 | 373.13                |
| 16                                | 83                        | 0.061      | 4                 | 10,608                   | 22                            | 0.188      | 0.126     | 0.743     | 5.177 | 2.453 | 0.718 | 365.07                |
| 17                                | 84                        | 0.052      | 1                 | 9,323                    | 13                            | 0.190      | 0.129     | 0.738     | 5.263 | 2.486 | 0.709 | 365.50                |
| 18                                | 33                        | 0.157      | 1                 | 11,757                   | 4                             | 0.192      | 0.129     | 0.733     | 5.242 | 2.502 | 0.711 | 377.85                |
| 19                                | 86                        | 0.105      | 9                 | 11,060                   | 12                            | 0.195      | 0.131     | 0.722     | 5.265 | 2.521 | 0.709 | 368.75                |
| 20                                | 44                        | 0.137      | 5                 | 11,099                   | 2                             | 0.191      | 0.131     | 0.735     | 5.266 | 2.534 | 0.709 | 380.64                |
| 21                                | 359                       | 0.196      | 1                 | 1,111                    | 3                             | 0.191      | 0.128     | 0.735     | 5.204 | 2.466 | 0.716 | 375.64                |
| 22                                | 168                       | 0.027      | 5                 | 2,205                    | 11                            | 0.186      | 0.126     | 0.748     | 5.136 | 2.445 | 0.723 | 365.27                |
| 23                                | 132                       | 0.124      | 2                 | 478                      | 32                            | 0.189      | 0.130     | 0.741     | 5.182 | 2.494 | 0.718 | 370.60                |
| 24                                | 257                       | 0.034      | 17                | 2,040                    | 10                            | 0.189      | 0.130     | 0.740     | 5.326 | 2.541 | 0.702 | 359.86                |
| 25                                | 90                        | 0.123      | 1                 | 13,140                   | 5                             | 0.191      | 0.127     | 0.736     | 5.178 | 2.439 | 0.718 | 384.88                |
| 26                                | 261                       | 0.025      | 10                | 13,856                   | 4                             | 0.189      | 0.130     | 0.741     | 5.323 | 2.536 | 0.702 | 362.90                |
| 27                                | 35                        | 0.213      | 1                 | 202                      | 25                            | 0.205      | 0.145     | 0.695     | 5.631 | 2.771 | 0.667 | 405.56                |
| 28                                | 55                        | 0.088      | 2                 | 10,499                   | 11                            | 0.190      | 0.127     | 0.737     | 5.136 | 2.440 | 0.723 | 377.69                |
| 29                                | 248                       | 0.140      | 13                | 78                       | 16                            | 0.198      | 0.132     | 0.714     | 5.539 | 2.597 | 0.678 | 378.02                |
| 30                                | 37                        | 0.166      | 6                 | 13,604                   | 5                             | 0.195      | 0.133     | 0.723     | 5.498 | 2.602 | 0.682 | 372.97                |

**Table S10: Tuned hyperparameters and accuracy metrics for 30 classification models fitted to the ESP training set.** The model with best *MCC* (Mathew’s Correlation Coefficient) was chosen for using in the final predictive two-part model of sodicity.

| ESP classification |                           |            |                   |                          |                               |                        |                      |              |           |        |            |            |
|--------------------|---------------------------|------------|-------------------|--------------------------|-------------------------------|------------------------|----------------------|--------------|-----------|--------|------------|------------|
| No.                | Number of learning cycles | Learn rate | Minimum leaf size | Maximum number of splits | Number of variables to sample | Binomial deviance loss | Classification error | Accuracy (%) | Precision | Recall | <i>MCC</i> | <i>MOF</i> |
| 1                  | 28                        | 0.231      | 1                 | 9,436                    | -                             | 0.209                  | 0.149                | 85.065       | 0.853     | 0.882  | 0.697      | 0.154      |
| 2                  | 94                        | -          | 1                 | 40,194                   | 11                            | 0.229                  | 0.146                | 85.390       | 0.855     | 0.886  | 0.704      | 0.155      |
| 3                  | 65                        | -          | 1                 | 186,555                  | 5                             | 0.229                  | 0.150                | 85.007       | 0.850     | 0.885  | 0.696      | 0.154      |
| 4                  | 175                       | -          | 4                 | 53,692                   | 2                             | 0.230                  | 0.148                | 85.249       | 0.853     | 0.886  | 0.701      | 0.152      |
| 5                  | 50                        | -          | 1                 | 98,133                   | 3                             | 0.229                  | 0.147                | 85.274       | 0.855     | 0.884  | 0.702      | 0.152      |
| 6                  | 112                       | -          | 2                 | 60,487                   | 2                             | 0.230                  | 0.148                | 85.240       | 0.854     | 0.883  | 0.701      | 0.153      |
| 7                  | 74                        | -          | 1                 | 190,915                  | 2                             | 0.229                  | 0.146                | 85.411       | 0.857     | 0.884  | 0.704      | 0.151      |
| 8                  | 50                        | -          | 1                 | 197,849                  | 2                             | 0.229                  | 0.146                | 85.379       | 0.856     | 0.883  | 0.704      | 0.150      |
| 9                  | 16                        | -          | 1                 | 194,982                  | 4                             | 0.229                  | 0.153                | 84.736       | 0.850     | 0.879  | 0.691      | 0.159      |
| 10                 | 208                       | -          | 1                 | 80,815                   | 2                             | 0.229                  | 0.144                | 85.593       | 0.859     | 0.885  | 0.708      | 0.149      |
| 11                 | 77                        | -          | 1                 | 113,132                  | 2                             | 0.229                  | 0.150                | 85.034       | 0.852     | 0.883  | 0.697      | 0.151      |
| 12                 | 29                        | -          | 1                 | 119,019                  | 4                             | 0.229                  | 0.149                | 85.077       | 0.851     | 0.884  | 0.698      | 0.154      |
| 13                 | 52                        | -          | 2                 | 185,249                  | 2                             | 0.230                  | 0.148                | 85.233       | 0.855     | 0.883  | 0.701      | 0.155      |
| 14                 | 82                        | -          | 1                 | 123,708                  | 2                             | 0.229                  | 0.147                | 85.331       | 0.857     | 0.882  | 0.703      | 0.155      |
| 15                 | 26                        | -          | 2                 | 71,302                   | 2                             | 0.230                  | 0.151                | 84.938       | 0.852     | 0.880  | 0.695      | 0.156      |
| 16                 | 225                       | -          | 2                 | 102,714                  | 2                             | 0.229                  | 0.149                | 85.114       | 0.853     | 0.882  | 0.698      | 0.151      |
| 17                 | 48                        | -          | 1                 | 118,810                  | 12                            | 0.229                  | 0.148                | 85.156       | 0.853     | 0.884  | 0.699      | 0.157      |
| 18                 | 155                       | -          | 1                 | 51,096                   | 14                            | 0.229                  | 0.145                | 85.509       | 0.856     | 0.887  | 0.706      | 0.151      |
| 19                 | 80                        | -          | 1                 | 64,011                   | 3                             | 0.229                  | 0.147                | 85.329       | 0.854     | 0.886  | 0.703      | 0.150      |
| 20                 | 155                       | -          | 2                 | 14,430                   | 4                             | 0.230                  | 0.149                | 85.119       | 0.850     | 0.887  | 0.698      | 0.154      |
| 21                 | 18                        | -          | 2                 | 169,555                  | 3                             | 0.229                  | 0.151                | 84.948       | 0.851     | 0.882  | 0.695      | 0.156      |
| 22                 | 72                        | -          | 2                 | 149,721                  | 2                             | 0.229                  | 0.146                | 85.363       | 0.855     | 0.884  | 0.703      | 0.150      |
| 23                 | 111                       | -          | 2                 | 51,520                   | 2                             | 0.229                  | 0.146                | 85.394       | 0.855     | 0.885  | 0.704      | 0.153      |
| 24                 | 25                        | -          | 1                 | 29,331                   | 11                            | 0.229                  | 0.149                | 85.110       | 0.853     | 0.883  | 0.698      | 0.157      |
| 25                 | 164                       | -          | 2                 | 145,917                  | 4                             | 0.229                  | 0.147                | 85.343       | 0.853     | 0.887  | 0.703      | 0.154      |
| 26                 | 209                       | -          | 1                 | 30,842                   | 4                             | 0.229                  | 0.148                | 85.163       | 0.852     | 0.886  | 0.699      | 0.151      |
| 27                 | 180                       | -          | 1                 | 34,111                   | 4                             | 0.229                  | 0.146                | 85.391       | 0.855     | 0.886  | 0.704      | 0.150      |
| 28                 | 48                        | -          | 1                 | 67,923                   | 20                            | 0.231                  | 0.159                | 84.147       | 0.837     | 0.885  | 0.679      | 0.158      |
| 29                 | 53                        | -          | 1                 | 92,899                   | 4                             | 0.229                  | 0.151                | 84.859       | 0.853     | 0.878  | 0.693      | 0.155      |
| 30                 | 211                       | -          | 2                 | 138,786                  | 2                             | 0.229                  | 0.148                | 85.177       | 0.852     | 0.885  | 0.700      | 0.151      |

**Table S11: Tuned hyperparameters and accuracy metrics for 30 regression models fitted to the non-sodic class (ESP < 1%).** The model with best *NSE* (Nash–Sutcliffe model efficiency coefficient) was chosen for using in the final predictive two-part model of sodicity.

| ESP regression non-sodic |                           |            |                   |                          |                               |            |           |           |       |       |       |                       |
|--------------------------|---------------------------|------------|-------------------|--------------------------|-------------------------------|------------|-----------|-----------|-------|-------|-------|-----------------------|
| No.                      | Number of learning cycles | Learn rate | Minimum leaf size | Maximum number of splits | Number of variables to sample | RMSE (log) | MAE (log) | NSE (log) | RMSE  | MAE   | NSE   | MOF × 10 <sup>4</sup> |
| 1                        | 196                       | 0.058      | 27                | 7,078                    | 3                             | 0.071      | 0.045     | 0.561     | 0.226 | 0.141 | 0.536 | 51.95                 |
| 2                        | 210                       | 0.052      | 6                 | 34,502                   | 1                             | 0.071      | 0.046     | 0.558     | 0.226 | 0.143 | 0.532 | 51.22                 |
| 3                        | 69                        | 0.120      | 12                | 23,081                   | 2                             | 0.072      | 0.047     | 0.549     | 0.229 | 0.145 | 0.523 | 52.44                 |
| 4                        | 265                       | 0.031      | 6                 | 27,557                   | 1                             | 0.071      | 0.046     | 0.563     | 0.225 | 0.143 | 0.536 | 51.67                 |
| 5                        | 155                       | 0.072      | 4                 | 3,473                    | 2                             | 0.071      | 0.046     | 0.563     | 0.225 | 0.144 | 0.536 | 51.05                 |
| 6                        | 238                       | 0.045      | 17                | 72,003                   | 2                             | 0.071      | 0.047     | 0.563     | 0.225 | 0.145 | 0.537 | 51.89                 |
| 7                        | 166                       | 0.045      | 16                | 96,243                   | 3                             | 0.072      | 0.045     | 0.548     | 0.229 | 0.141 | 0.523 | 51.71                 |
| 8                        | 121                       | 0.155      | 10                | 3,881                    | 3                             | 0.071      | 0.047     | 0.560     | 0.226 | 0.145 | 0.534 | 51.99                 |
| 9                        | 478                       | 0.009      | 1                 | 6,981                    | 4                             | 0.071      | 0.046     | 0.563     | 0.226 | 0.143 | 0.534 | 51.64                 |
| 10                       | 479                       | 0.020      | 18                | 1,906                    | 3                             | 0.071      | 0.048     | 0.560     | 0.227 | 0.150 | 0.532 | 51.76                 |
| 11                       | 170                       | 0.058      | 5                 | 13,936                   | 1                             | 0.072      | 0.046     | 0.549     | 0.228 | 0.142 | 0.524 | 51.99                 |
| 12                       | 489                       | 0.022      | 13                | 96,009                   | 4                             | 0.071      | 0.046     | 0.560     | 0.226 | 0.143 | 0.535 | 51.49                 |
| 13                       | 117                       | 0.092      | 4                 | 5,232                    | 2                             | 0.071      | 0.047     | 0.555     | 0.227 | 0.145 | 0.529 | 52.49                 |
| 14                       | 318                       | 0.016      | 5                 | 15,194                   | 2                             | 0.071      | 0.045     | 0.562     | 0.226 | 0.141 | 0.535 | 52.34                 |
| 15                       | 272                       | 0.039      | 16                | 2,251                    | 2                             | 0.071      | 0.048     | 0.562     | 0.226 | 0.148 | 0.534 | 52.18                 |
| 16                       | 113                       | 0.064      | 20                | 5,851                    | 5                             | 0.071      | 0.046     | 0.559     | 0.226 | 0.143 | 0.533 | 52.21                 |
| 17                       | 318                       | 0.017      | 6                 | 78,130                   | 3                             | 0.071      | 0.045     | 0.562     | 0.226 | 0.141 | 0.535 | 51.44                 |
| 18                       | 378                       | 0.030      | 12                | 95,924                   | 2                             | 0.071      | 0.046     | 0.563     | 0.225 | 0.142 | 0.537 | 51.14                 |
| 19                       | 192                       | 0.030      | 9                 | 64,674                   | 2                             | 0.071      | 0.046     | 0.562     | 0.226 | 0.144 | 0.535 | 51.44                 |
| 20                       | 75                        | 0.087      | 5                 | 6,384                    | 2                             | 0.071      | 0.046     | 0.558     | 0.227 | 0.144 | 0.532 | 52.13                 |
| 21                       | 222                       | 0.037      | 1                 | 3,599                    | 4                             | 0.071      | 0.046     | 0.561     | 0.226 | 0.144 | 0.533 | 52.03                 |
| 22                       | 368                       | 0.027      | 1                 | 3,022                    | 1                             | 0.072      | 0.045     | 0.553     | 0.228 | 0.140 | 0.527 | 52.15                 |
| 23                       | 365                       | 0.052      | 5                 | 1,245                    | 3                             | 0.071      | 0.046     | 0.558     | 0.227 | 0.143 | 0.531 | 51.40                 |
| 24                       | 421                       | 0.014      | 4                 | 55,809                   | 2                             | 0.071      | 0.044     | 0.553     | 0.228 | 0.139 | 0.528 | 51.71                 |
| 25                       | 353                       | 0.043      | 5                 | 87,892                   | 1                             | 0.071      | 0.045     | 0.560     | 0.226 | 0.140 | 0.534 | 52.80                 |
| 26                       | 194                       | 0.058      | 9                 | 12,642                   | 3                             | 0.071      | 0.046     | 0.555     | 0.227 | 0.142 | 0.530 | 52.22                 |
| 27                       | 395                       | 0.027      | 1                 | 18,392                   | 1                             | 0.071      | 0.045     | 0.556     | 0.227 | 0.141 | 0.530 | 52.11                 |
| 28                       | 87                        | 0.048      | 6                 | 83,758                   | 4                             | 0.071      | 0.046     | 0.558     | 0.227 | 0.143 | 0.530 | 51.72                 |
| 29                       | 217                       | 0.037      | 9                 | 3,935                    | 2                             | 0.071      | 0.044     | 0.555     | 0.227 | 0.139 | 0.528 | 51.89                 |
| 30                       | 489                       | 0.021      | 8                 | 1,968                    | 2                             | 0.071      | 0.048     | 0.559     | 0.227 | 0.150 | 0.531 | 52.12                 |

**Table S12: Tuned hyperparameters and accuracy metrics for 30 regression models fitted to the sodic class (ESP ≥ 1%).** The model with best *NSE* was chosen for using in the final predictive two-part model of sodicity.

| ESP regression sodic |                           |            |                   |                          |                               |            |           |           |       |       |       |       |
|----------------------|---------------------------|------------|-------------------|--------------------------|-------------------------------|------------|-----------|-----------|-------|-------|-------|-------|
| No.                  | Number of learning cycles | Learn rate | Minimum leaf size | Maximum number of splits | Number of variables to sample | RMSE (log) | MAE (log) | NSE (log) | RMSE  | MAE   | NSE   | MOF   |
| 1                    | 121                       | 0.055      | 1                 | 58,832                   | 2                             | 0.232      | 0.160     | 0.743     | 6.832 | 2.668 | 0.721 | 0.057 |
| 2                    | 172                       | 0.102      | 6                 | 12,029                   | 2                             | 0.230      | 0.159     | 0.745     | 6.784 | 2.628 | 0.725 | 0.056 |
| 3                    | 394                       | 0.053      | 18                | 77,202                   | 4                             | 0.229      | 0.159     | 0.749     | 6.979 | 2.674 | 0.709 | 0.055 |
| 4                    | 144                       | 0.117      | 12                | 86,769                   | 4                             | 0.236      | 0.165     | 0.733     | 7.093 | 2.798 | 0.700 | 0.057 |
| 5                    | 295                       | 0.031      | 1                 | 36,274                   | 2                             | 0.231      | 0.158     | 0.744     | 6.772 | 2.616 | 0.726 | 0.055 |
| 6                    | 465                       | 0.012      | 1                 | 82,208                   | 2                             | 0.231      | 0.160     | 0.744     | 6.960 | 2.707 | 0.711 | 0.055 |
| 7                    | 262                       | 0.023      | 7                 | 20,550                   | 4                             | 0.233      | 0.163     | 0.740     | 7.312 | 2.780 | 0.681 | 0.057 |
| 8                    | 218                       | 0.042      | 7                 | 11,874                   | 3                             | 0.231      | 0.160     | 0.745     | 7.091 | 2.702 | 0.700 | 0.056 |
| 9                    | 302                       | 0.028      | 1                 | 23,465                   | 2                             | 0.231      | 0.160     | 0.745     | 6.866 | 2.689 | 0.719 | 0.055 |
| 10                   | 333                       | 0.019      | 1                 | 21,829                   | 3                             | 0.231      | 0.160     | 0.743     | 6.947 | 2.664 | 0.712 | 0.056 |
| 11                   | 116                       | 0.066      | 1                 | 8,039                    | 3                             | 0.232      | 0.161     | 0.742     | 6.995 | 2.695 | 0.708 | 0.056 |
| 12                   | 347                       | 0.035      | 8                 | 58,001                   | 2                             | 0.227      | 0.157     | 0.753     | 6.795 | 2.634 | 0.725 | 0.054 |
| 13                   | 75                        | 0.058      | 1                 | 17,824                   | 2                             | 0.236      | 0.165     | 0.732     | 7.109 | 2.755 | 0.698 | 0.058 |
| 14                   | 96                        | 0.097      | 7                 | 6,191                    | 2                             | 0.232      | 0.162     | 0.741     | 7.130 | 2.728 | 0.697 | 0.056 |
| 15                   | 33                        | 0.222      | 2                 | 15,408                   | 2                             | 0.234      | 0.159     | 0.738     | 6.780 | 2.649 | 0.726 | 0.059 |
| 16                   | 444                       | 0.086      | 24                | 73,908                   | 2                             | 0.229      | 0.159     | 0.749     | 6.852 | 2.667 | 0.720 | 0.055 |
| 17                   | 117                       | 0.033      | 1                 | 72,240                   | 2                             | 0.234      | 0.162     | 0.738     | 7.121 | 2.713 | 0.697 | 0.057 |
| 18                   | 481                       | 0.019      | 5                 | 70,110                   | 2                             | 0.227      | 0.158     | 0.752     | 6.817 | 2.634 | 0.723 | 0.055 |
| 19                   | 218                       | 0.062      | 18                | 86,189                   | 2                             | 0.231      | 0.162     | 0.744     | 7.125 | 2.780 | 0.697 | 0.055 |
| 20                   | 125                       | 0.121      | 10                | 15,807                   | 1                             | 0.235      | 0.165     | 0.736     | 7.182 | 2.829 | 0.692 | 0.057 |
| 21                   | 317                       | 0.041      | 2                 | 6,448                    | 3                             | 0.230      | 0.158     | 0.747     | 6.929 | 2.644 | 0.714 | 0.056 |
| 22                   | 144                       | 0.029      | 1                 | 62,848                   | 4                             | 0.233      | 0.163     | 0.739     | 7.172 | 2.776 | 0.693 | 0.058 |
| 23                   | 309                       | 0.108      | 41                | 72,322                   | 4                             | 0.234      | 0.165     | 0.738     | 7.239 | 2.843 | 0.687 | 0.056 |
| 24                   | 66                        | 0.115      | 4                 | 53,906                   | 1                             | 0.233      | 0.162     | 0.739     | 6.945 | 2.714 | 0.712 | 0.058 |
| 25                   | 182                       | 0.065      | 11                | 81,746                   | 3                             | 0.233      | 0.163     | 0.739     | 6.996 | 2.756 | 0.708 | 0.056 |
| 26                   | 295                       | 0.171      | 12                | 1,713                    | 4                             | 0.234      | 0.162     | 0.736     | 6.981 | 2.688 | 0.709 | 0.058 |
| 27                   | 374                       | 0.015      | 1                 | 58,737                   | 4                             | 0.235      | 0.162     | 0.736     | 7.009 | 2.687 | 0.707 | 0.057 |
| 28                   | 188                       | 0.131      | 1                 | 2,564                    | 3                             | 0.232      | 0.160     | 0.742     | 6.892 | 2.688 | 0.717 | 0.056 |
| 29                   | 228                       | 0.104      | 6                 | 62,585                   | 1                             | 0.231      | 0.160     | 0.744     | 6.794 | 2.666 | 0.725 | 0.057 |
| 30                   | 210                       | 0.057      | 3                 | 53,132                   | 2                             | 0.230      | 0.158     | 0.746     | 6.794 | 2.619 | 0.725 | 0.055 |

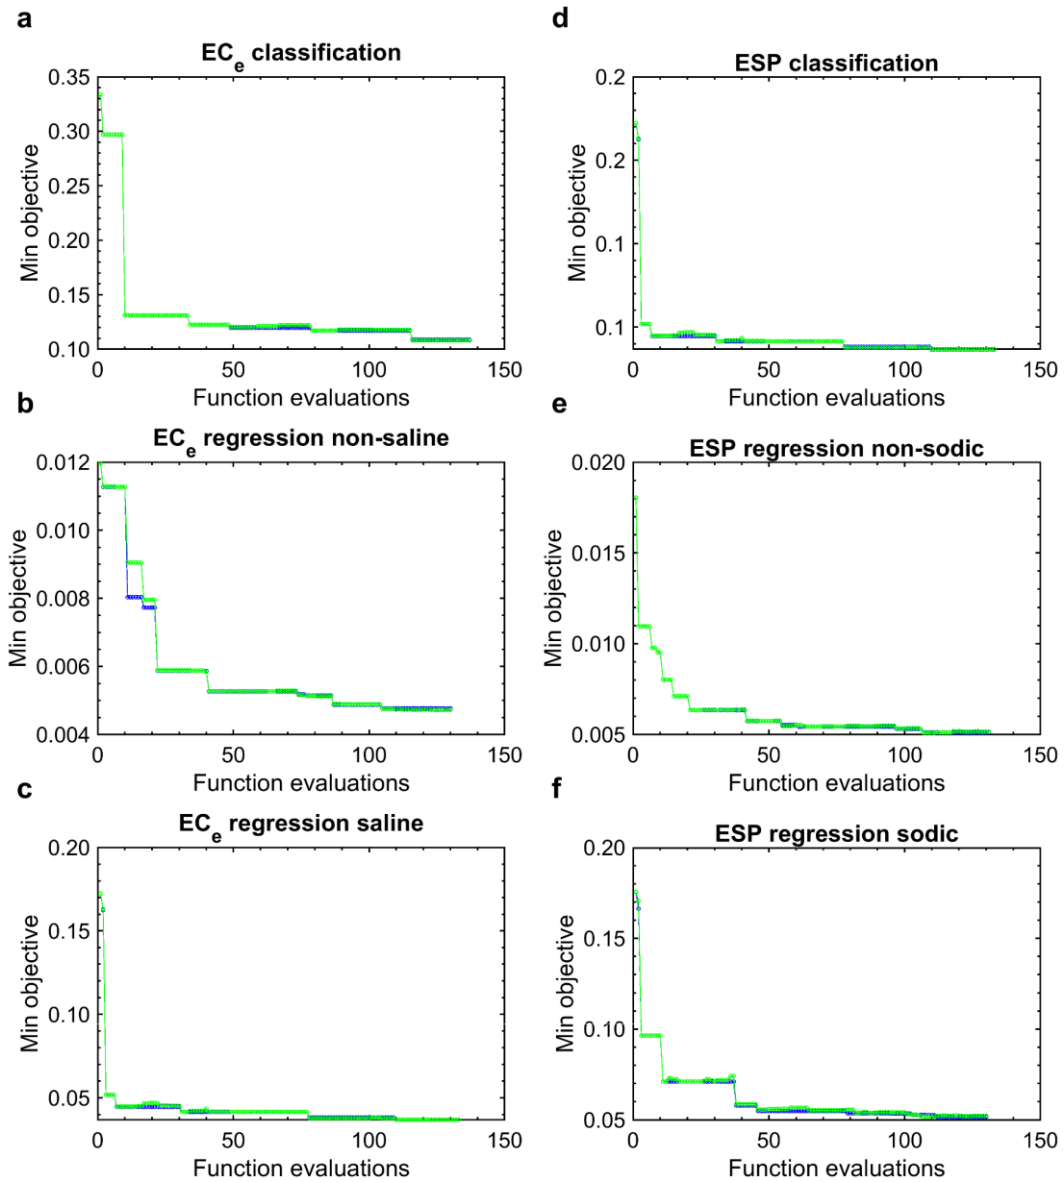

**Figure S19: Objective function value against the iteration number during model hyperparameter tuning of the best-fitted models.** The maximum number of objective function evaluations was 130. Green and blue lines show the observed and estimated objective function values, respectively.

## 4 Limitations

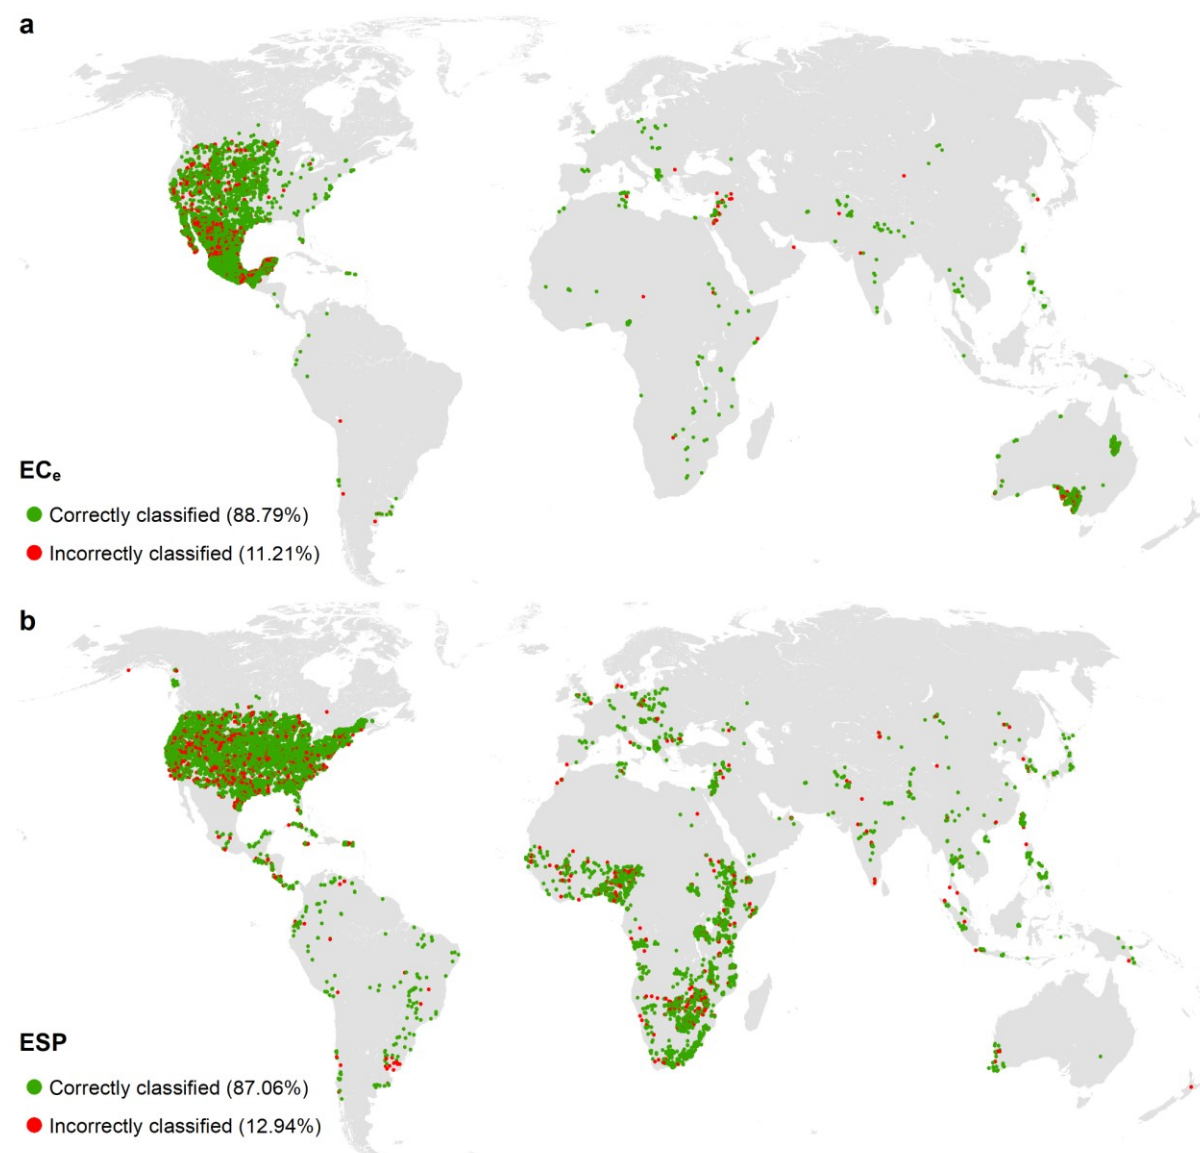

**Figure S20: Spatial distribution of the known surface measurements classified by the two-part models. a, EC<sub>e</sub>. b, ESP.** Any available EC<sub>e</sub> or ESP measurement from 1980 with zero upper sample's depth and a maximum lower sample's depth equal to 30 cm was used as a known surface measurement. We categorised the known surface measurements of EC<sub>e</sub> into five classes of non-saline (0 - 2 dS m<sup>-1</sup>), slightly saline (2 - 4 dS m<sup>-1</sup>), moderately saline (4 - 8 dS m<sup>-1</sup>), highly saline (8 - 16 dS m<sup>-1</sup>), and extremely saline (> 16 dS m<sup>-1</sup>) and similarly, the known surface measurements of ESP into five classes of non-sodic (0 - 1%), slightly sodic (1 - 6%), moderately sodic (6 - 15%), highly sodic (16 - 30%), and extremely sodic (> 30%). The above maps are generated by comparison between the measured data classes and final predictions of the two-part models falling into each class.

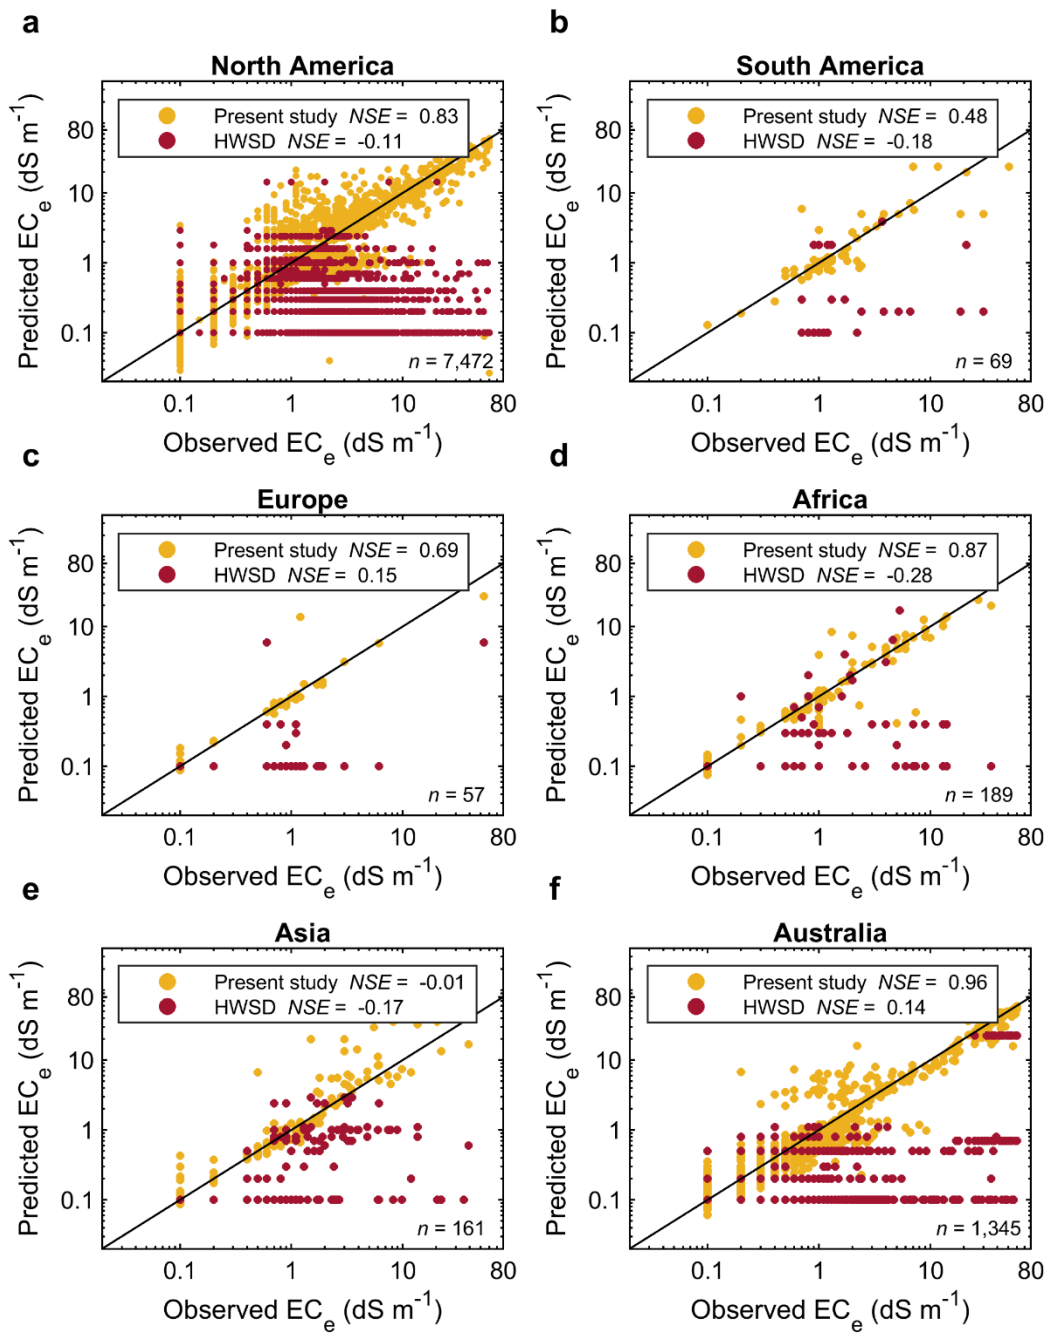

**Figure S21: Comparison between the measured soil surface electrical conductivity of saturated-paste extract ( $EC_e$ ) and the values predicted by the two-part models developed in this study as well as the values presented by Harmonized World Soil Database (HWSD) at the continent level.  $NSE$  = Nash-Sutcliffe model efficiency coefficient (5) ranging from  $-\infty$  to 1;  $NSE = 1$  shows a perfect match.**

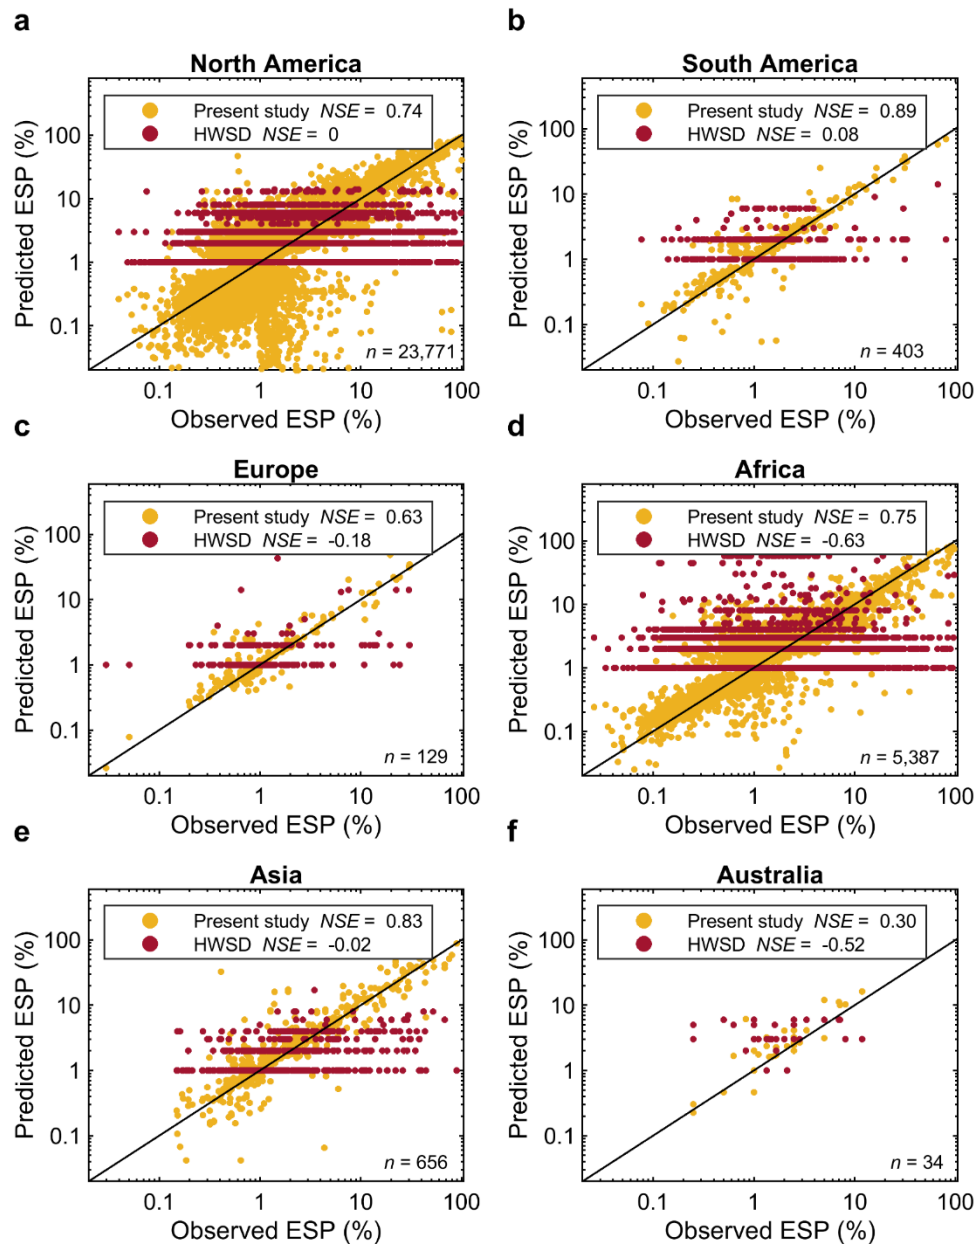

**Figure S22: Comparison between the measured surface soil exchangeable sodium percentage (ESP) and the values predicted by the two-part models developed in this study as well as the values presented by Harmonized World Soil Database (HWSD) at the continent level.** Nash-Sutcliffe model efficiency coefficient (5) ( $NSE$ , ranging from  $-\infty$  to 1;  $NSE = 1$  shows a perfect match) for South America with ~1% contribution to ESP training dataset was 0.89 whereas  $NSE$  of North America with > 80% involvement in the training dataset was 0.74. In spite of this, predictions of surface  $EC_e$  and ESP for Asia ( $NSE = -0.01$ , number of observations = 161) and Australia ( $NSE = 0.30$ , number of observations = 34) were still of the lowest certainty, respectively. The low  $NSE$  values might be due to the insufficient number of validating surface measurements. Overall, the performance of the models in estimation of individual continents' soil surface salinity/sodicity with an  $NSE$  ranging from -0.01 to 0.96 (mean for all continents = 0.63) was better than the mean  $NSE$  of -0.14 for HWSD predictions.



## 5 Statistics on salt-affected regions

We would assume soils of a particular location as salt-affected if the annual predicted  $EC_e$  of that location were  $\geq 4 \text{ dS m}^{-1}$  and/or its predicted ESP were  $\geq 6\%$  in at least 75% of the years between 1980 and 2018 period.

**Note:** All statistical analysis presented here were calculated for the regions delimited to  $-55^\circ$  and  $55^\circ$  latitudes, i.e. tropics, subtropics, and temperate zones. Statistics of the countries located above  $55^\circ$  latitude (e.g. Canada, Russia, and United Kingdom) are not reported here.

### List of tables:

**Table S13:** Mean cell-level likelihood of the soils with an  $EC_e \geq 4 \text{ dS m}^{-1}$  or  $ESP \geq 6\%$  for different biomes and land cover types between 1980 and 2018. Also this table shows statistics on the soil cell-level trends in  $EC_e$  and  $ESP$  ( $p < 0.05$ ) for each land cover and biome type in the 1980 - 2018 period.

**Table S14:** Mean cell-level likelihood of the soils with an  $EC_e \geq 4 \text{ dS m}^{-1}$  or  $ESP \geq 6\%$  for different climate zones between 1980 and 2018. Also this table shows statistics on the soil cell-level trends in  $EC_e$  and  $ESP$  ( $p < 0.05$ ) for each climate zone in the 1980 - 2018 period.

**Table S15:** Statistics on the total area of soils with an  $EC_e$  or  $ESP$  between certain thresholds in the 1980 - 2018 period at the land cover level. This table also contains information about the land cover-level trends in the total area of soils with an  $EC_e \geq 4 \text{ dS m}^{-1}$  or  $ESP \geq 6\%$  since 1980 and their statistical significance (each class includes its left class edge).

**Table S16:** Statistics on the total area of soils with an  $EC_e$  between certain thresholds in the 1980 - 2018 period at the biome level. This table also shows information about the biome-level trends in the total area of soils with an  $EC_e \geq 4 \text{ dS m}^{-1}$  since 1980 and their statistical significance (each class includes its left class edge).

**Table S17:** Statistics on the total area of soils with an  $ESP$  between certain thresholds in the 1980 - 2018 period at the biome level. This table also contains information about the biome-level trends in the total area of soils with an  $ESP \geq 6\%$  since 1980 and their statistical significance (each class includes its left class edge).

**Table S18:** Statistics on the total area of soils with an  $EC_e$  between certain thresholds in the 1980 - 2018 period at the climate level. This table also shows information about the climate-level trends in the total area of soils with an  $EC_e \geq 4 \text{ dS m}^{-1}$  since 1980 and their statistical significance (each class includes its left class edge).

**Table S19:** Statistics on the total area of soils with an  $ESP$  between certain thresholds in the 1980 - 2018 period at the climate level. This table also contains information about the climate-level trends in the total area of soils with an  $ESP \geq 6\%$  since 1980 and their statistical significance (each class includes its left class edge).

**Table S20:** Statistics on the total area of soils with an  $EC_e$  between certain thresholds in the 1980 - 2018 period at the continent level. This table also shows information about the continent-level trends in the total area of soils with an  $EC_e \geq 4 \text{ dS m}^{-1}$  since 1980 and 1999 and the corresponding statistical significance (each class includes its left class edge).

**Table S21:** Statistics on the total area of soils with an  $ESP$  between certain thresholds in the 1980 - 2018 period at the continent level. This table also contains information about the continent-level trends in the total area of soils with an  $ESP \geq 6\%$  since 1980 and 1999 and the corresponding statistical significance (each class includes its left class edge).

**Table S22:** Statistics on the total area of soils with an  $EC_e$  between certain thresholds in the 1980 - 2018 period at the country level. This table also shows information about the country-level trends in the total area of soils with an  $EC_e \geq 4 \text{ dS m}^{-1}$  since 1980 and the corresponding statistical significance (each class includes its left class edge).

**Table S23:** Statistics on the total area of soils with an ESP between certain thresholds in the 1980 - 2018 period at the country level. This table also contains information about the country-level trends in the total area of soils with an  $ESP \geq 6\%$  since 1980 and the corresponding statistical significance (each class includes its left class edge).

**Table S13: Mean cell-level likelihood of the soils with an  $EC_e \geq 4 \text{ dS m}^{-1}$  or  $ESP \geq 6\%$  for different biomes and land cover types between 1980 and 2018.** Also this table shows statistics on the soil cell-level trends in  $EC_e$  and  $ESP$  ( $p < 0.05$ ) for each land cover and biome in the 1980 - 2018 period.

|                                                              | $EC_e$                                                    |          | $ESP$                                      |          | $EC_e$                       | $ESP$    |
|--------------------------------------------------------------|-----------------------------------------------------------|----------|--------------------------------------------|----------|------------------------------|----------|
|                                                              | Trend ( $\times 10^5 \text{ dS m}^{-1} \text{ yr}^{-1}$ ) |          | Trend ( $\times 10^5 \% \text{ yr}^{-1}$ ) |          | Likelihood ( $\times 10^5$ ) |          |
| <b>Land cover</b>                                            | MEAN                                                      | STD      | MEAN                                       | STD      | MEAN                         |          |
| Evergreen Needleleaf Forests                                 | -193.94                                                   | 1,330.98 | -218.25                                    | 1,013.15 | 66.02                        | 1.96     |
| Evergreen Broadleaf Forests                                  | 1,373.16                                                  | 4,812.37 | 440.51                                     | 2,459.06 | 727.24                       | 0.52     |
| Deciduous Needleleaf Forests                                 | -110.53                                                   | 425.51   | -221.27                                    | 2,001.71 | 1.63                         | 0.00     |
| Deciduous Broadleaf Forests                                  | -60.81                                                    | 1,496.96 | -213.23                                    | 665.46   | 32.26                        | 0.44     |
| Mixed Forests                                                | -138.18                                                   | 1,381.59 | -204.27                                    | 982.49   | 51.78                        | 0.39     |
| Closed Shrublands                                            | -1,366.40                                                 | 2,460.76 | 2,151.29                                   | 3,087.65 | 90.90                        | 61.96    |
| Open Shrublands                                              | -1,758.10                                                 | 9,716.26 | 275.03                                     | 3,420.53 | 3,002.27                     | 1,832.48 |
| Woody Savannas                                               | -147.79                                                   | 2,023.91 | -94.37                                     | 2,018.11 | 88.04                        | 42.36    |
| Savannas                                                     | 87.18                                                     | 1,579.73 | -481.02                                    | 2,665.50 | 108.94                       | 26.87    |
| Grasslands                                                   | -1,045.83                                                 | 4,600.50 | -799.55                                    | 4,401.40 | 651.07                       | 1,531.19 |
| Croplands                                                    | -414.23                                                   | 2,067.68 | -1,439.65                                  | 3,094.71 | 237.19                       | 337.82   |
| Barren                                                       | -8.47                                                     | 9,614.04 | 78.34                                      | 3,400.27 | 3,009.40                     | 3,633.16 |
|                                                              | $EC_e$                                                    |          | $ESP$                                      |          | $EC_e$                       | $ESP$    |
|                                                              | Trend ( $\times 10^5 \text{ dS m}^{-1} \text{ yr}^{-1}$ ) |          | Trend ( $\times 10^5 \% \text{ yr}^{-1}$ ) |          | Likelihood ( $\times 10^5$ ) |          |
| <b>Biome</b>                                                 | MEAN                                                      | STD      | MEAN                                       | STD      | MEAN                         |          |
| Tropical and Subtropical Moist Broadleaf Forests             | 483.8978                                                  | 4326.879 | -18.63                                     | 2,438.43 | 518.48                       | 7.99     |
| Tropical and Subtropical Dry Broadleaf Forests               | -1244.43                                                  | 3000.977 | -1,005.10                                  | 3,214.77 | 256.79                       | 139.22   |
| Temperate Broadleaf and Mixed Forests                        | -499.945                                                  | 2495.365 | -347.28                                    | 2,061.64 | 133.55                       | 153.88   |
| Tropical and Subtropical Grasslands, Savannas and Shrublands | -756.812                                                  | 5115.055 | -589.24                                    | 3,000.58 | 580.47                       | 166.23   |
| Temperate Grasslands, Savannas and Shrublands                | -569.106                                                  | 3165.172 | -818.54                                    | 3,683.85 | 366.81                       | 830.73   |
| Montane Grasslands and Shrublands                            | -329.883                                                  | 4007.414 | 105.22                                     | 4,965.57 | 574.33                       | 2,032.18 |
| Mangroves                                                    | -1590.22                                                  | 7012.804 | -577.33                                    | 2,401.83 | 1,672.36                     | 332.69   |
| Flooded Grasslands and Savannas                              | -2653.01                                                  | 6889.474 | -314.04                                    | 3,296.76 | 1,282.01                     | 1,005.42 |
| Mediterranean Forests, Woodlands and Scrub                   | -836.737                                                  | 3866.973 | 122.03                                     | 2,462.69 | 568.10                       | 565.74   |
| Deserts and Xeric Shrublands                                 | -706.209                                                  | 9238.99  | 159.96                                     | 4,029.28 | 2,777.99                     | 3,416.36 |
| Tropical and Subtropical Coniferous Forests                  | -2439.09                                                  | 2505.256 | -191.37                                    | 2,820.89 | 51.70                        | 38.13    |
| Temperate Conifer Forests                                    | -467.236                                                  | 2588.667 | -169.80                                    | 2,061.95 | 139.45                       | 162.14   |

**Table S14: Mean cell-level likelihood of the soils with an  $EC_e \geq 4 \text{ dS m}^{-1}$  or  $ESP \geq 6\%$  for different climate zones between 1980 and 2018.** Also this table shows statistics on the soil cell-level trends in  $EC_e$  and  $ESP$  ( $p < 0.05$ ) for each climate zone in the 1980 - 2018 period. For the full name of the climate zones see [Figure S12](#).

| Climate | $EC_e$                                                    |           | ESP                                        |          | $EC_e$                       | ESP      |
|---------|-----------------------------------------------------------|-----------|--------------------------------------------|----------|------------------------------|----------|
|         | Trend ( $\times 10^5 \text{ dS m}^{-1} \text{ yr}^{-1}$ ) |           | Trend ( $\times 10^5 \% \text{ yr}^{-1}$ ) |          | Likelihood ( $\times 10^5$ ) |          |
|         | MEAN                                                      | STD       | MEAN                                       | STD      | MEAN                         |          |
| ET      | 111.18                                                    | 4,136.40  | 82.27                                      | 5,413.40 | 324.89                       | 2,276.64 |
| EF      | -383.11                                                   | 3,905.90  | -1,882.60                                  | 3,343.22 | 221.74                       | 360.87   |
| Dfc     | -391.58                                                   | 1,395.77  | -134.66                                    | 1,078.30 | 61.88                        | 28.50    |
| Dsc     | -246.93                                                   | 960.50    | -204.56                                    | 1,181.56 | 84.01                        | 56.12    |
| Bsk     | -835.32                                                   | 4,268.78  | -154.16                                    | 4,532.88 | 801.45                       | 1,990.51 |
| Cfc     | -228.74                                                   | 890.41    | -118.11                                    | 688.70   | 16.75                        | 16.82    |
| Cfb     | -152.44                                                   | 1,237.17  | -519.27                                    | 1,683.15 | 45.48                        | 29.10    |
| Csc     | -925.37                                                   | 2,375.44  | -496.08                                    | 2,575.24 | 62.62                        | 109.31   |
| Dfb     | -350.37                                                   | 1,766.04  | -870.50                                    | 2,054.51 | 116.81                       | 200.76   |
| Dwc     | -743.63                                                   | 2,342.93  | -238.56                                    | 2,051.83 | 96.02                        | 85.25    |
| Dwb     | -2,356.96                                                 | 4,014.65  | -421.00                                    | 2,014.50 | 314.16                       | 110.69   |
| Dsb     | -765.30                                                   | 2,372.16  | 208.22                                     | 3,471.50 | 223.41                       | 193.45   |
| CSb     | -816.80                                                   | 2,084.19  | -87.14                                     | 2,172.00 | 108.94                       | 196.48   |
| Dfa     | -237.36                                                   | 1,126.71  | -1,415.54                                  | 2,617.47 | 95.77                        | 312.66   |
| Bwk     | -439.18                                                   | 8,768.37  | 290.37                                     | 5,891.73 | 3,948.60                     | 7,330.95 |
| Dwa     | -897.44                                                   | 2,407.54  | -2,483.69                                  | 3,915.74 | 256.64                       | 156.36   |
| Csa     | -934.47                                                   | 2,594.95  | 288.00                                     | 2,942.60 | 199.09                       | 357.49   |
| Cfa     | -126.89                                                   | 2,797.89  | -356.57                                    | 2,212.29 | 128.52                       | 36.10    |
| Dsa     | -1,788.15                                                 | 3,690.43  | 94.90                                      | 3,583.49 | 497.52                       | 808.61   |
| Cwa     | -475.22                                                   | 2,062.28  | -92.62                                     | 2,217.25 | 109.35                       | 74.41    |
| BSh     | -1,896.97                                                 | 5,317.69  | -381.05                                    | 3,308.79 | 713.64                       | 531.97   |
| BWh     | -611.38                                                   | 10,495.24 | 78.17                                      | 3,205.38 | 3,038.27                     | 2,538.39 |
| Cwb     | -652.95                                                   | 2,053.46  | -43.37                                     | 1,633.36 | 79.63                        | 31.00    |
| Cwc     | -426.70                                                   | 3,692.22  | 26.40                                      | 2,616.76 | 587.85                       | 600.27   |
| Am      | 321.16                                                    | 5,290.85  | 359.73                                     | 2,572.52 | 649.19                       | 2.31     |
| AW      | -669.06                                                   | 2,592.30  | -367.78                                    | 3,051.78 | 191.40                       | 40.76    |
| As      | -791.21                                                   | 2,408.20  | -9.37                                      | 2,740.20 | 193.97                       | 31.36    |
| Af      | 2,054.75                                                  | 5,162.73  | -100.90                                    | 2,341.68 | 867.14                       | 1.25     |

**Table S15: Statistics on the total area of soils with an EC<sub>e</sub> or ESP between certain thresholds in the 1980 - 2018 period at the land cover level.** This table also contains information about the land cover-level trends in the total area of soils with an EC<sub>e</sub> ≥ 4 dS m<sup>-1</sup> or ESP ≥ 6% since 1980 and their statistical significance (each class includes its left class edge).

| EC <sub>e</sub>              |                                                                   |                                                                             |                                                                    |                                                                  |                                                                  |                                                                |                                                                                |                                                       |                       |
|------------------------------|-------------------------------------------------------------------|-----------------------------------------------------------------------------|--------------------------------------------------------------------|------------------------------------------------------------------|------------------------------------------------------------------|----------------------------------------------------------------|--------------------------------------------------------------------------------|-------------------------------------------------------|-----------------------|
| Land cover                   | Mean, EC <sub>e</sub> 4 - 8 dS m <sup>-1</sup> (km <sup>2</sup> ) | SD <sup>a</sup> EC <sub>e</sub> 4 - 8 dS m <sup>-1</sup> (km <sup>2</sup> ) | Mean, EC <sub>e</sub> 8 - 16 dS m <sup>-1</sup> (km <sup>2</sup> ) | SD, EC <sub>e</sub> 8 - 16 dS m <sup>-1</sup> (km <sup>2</sup> ) | Mean, EC <sub>e</sub> ≥ 16 dS m <sup>-1</sup> (km <sup>2</sup> ) | SD, EC <sub>e</sub> ≥ 16 dS m <sup>-1</sup> (km <sup>2</sup> ) | Mean of saline area, EC <sub>e</sub> ≥ 4 dS m <sup>-1</sup> (km <sup>2</sup> ) | 1980 - 2018 trend (km <sup>2</sup> yr <sup>-1</sup> ) | p-value (1980 - 2018) |
| Evergreen Needleleaf Forests | 4,835.6                                                           | 1,149.4                                                                     | 80.5                                                               | 22.0                                                             | 28.1                                                             | 17.6                                                           | 4,944.2                                                                        | -49.8                                                 | 0.002                 |
| Evergreen Broadleaf Forests  | 654,492.4                                                         | 229,964.5                                                                   | 3,858.4                                                            | 5,396.0                                                          | 8.6                                                              | 33.5                                                           | 658,359.4                                                                      | 10,349.0                                              | 0.001                 |
| Deciduous Needleleaf Forests | 28.9                                                              | 6.6                                                                         | 0.0                                                                | 0.0                                                              | 0.0                                                              | 0.0                                                            | 28.9                                                                           | 0.2                                                   | 0.031                 |
| Deciduous Broadleaf Forests  | 2,156.9                                                           | 915.2                                                                       | 132.3                                                              | 50.8                                                             | 64.2                                                             | 32.4                                                           | 2,353.4                                                                        | -47.1                                                 | 0.000                 |
| Mixed Forests                | 21,494.0                                                          | 5,005.5                                                                     | 200.1                                                              | 75.8                                                             | 110.3                                                            | 50.5                                                           | 21,804.4                                                                       | -184.6                                                | 0.008                 |
| Closed Shrublands            | 365.2                                                             | 279.7                                                                       | 8.8                                                                | 9.9                                                              | 0.0                                                              | 0.2                                                            | 374.1                                                                          | -3.5                                                  | 0.388                 |
| Open Shrublands              | 1,244,384.5                                                       | 185,061.8                                                                   | 490,577.4                                                          | 156,118.0                                                        | 87,384.3                                                         | 32,279.9                                                       | 1,822,346.1                                                                    | -5,010.4                                              | 0.115                 |
| Woody Savannas               | 6,760.7                                                           | 1,062.9                                                                     | 234.9                                                              | 188.6                                                            | 3.2                                                              | 3.4                                                            | 6,998.8                                                                        | 0.5                                                   | 0.975                 |
| Savannas                     | 17,339.4                                                          | 4,783.1                                                                     | 836.0                                                              | 277.1                                                            | 3.4                                                              | 12.9                                                           | 18,178.9                                                                       | 73.7                                                  | 0.300                 |
| Grasslands                   | 390,667.1                                                         | 62,346.5                                                                    | 88,496.8                                                           | 16,908.6                                                         | 20,122.9                                                         | 7,515.4                                                        | 499,286.7                                                                      | -4,836.6                                              | 0.000                 |
| Croplands                    | 148,125.4                                                         | 24,137.5                                                                    | 14,562.3                                                           | 3,294.7                                                          | 350.4                                                            | 367.3                                                          | 163,038.0                                                                      | -1,723.6                                              | 0.000                 |
| Barren                       | 3,013,899.4                                                       | 221,158.4                                                                   | 1,089,902.7                                                        | 115,492.3                                                        | 226,593.9                                                        | 76,531.5                                                       | 4,330,396.0                                                                    | -961.0                                                | 0.796                 |
| ESP                          |                                                                   |                                                                             |                                                                    |                                                                  |                                                                  |                                                                |                                                                                |                                                       |                       |
| Land cover                   | Mean, ESP 6 - 15% (km <sup>2</sup> )                              | SD, ESP 6 - 15% (km <sup>2</sup> )                                          | Mean, ESP 15 - 30% (km <sup>2</sup> )                              | SD, ESP 15 - 30% (km <sup>2</sup> )                              | Mean, ESP ≥ 30% (km <sup>2</sup> )                               | SD, ESP ≥ 30% (km <sup>2</sup> )                               | Mean of sodic area, ESP ≥ 6% (km <sup>2</sup> )                                | 1980 - 2018 trend (km <sup>2</sup> yr <sup>-1</sup> ) | p-value (1980 - 2018) |
| Evergreen Needleleaf Forests | 111.4                                                             | 115.0                                                                       | 0.0                                                                | 0.0                                                              | 0.0                                                              | 0.0                                                            | 111.4                                                                          | -4.6                                                  | 0.004                 |
| Evergreen Broadleaf Forests  | 465.6                                                             | 596.3                                                                       | 0.0                                                                | 0.0                                                              | 0.0                                                              | 0.0                                                            | 465.6                                                                          | 5.3                                                   | 0.541                 |
| Deciduous Broadleaf Forests  | 35.4                                                              | 41.5                                                                        | 0.0                                                                | 0.0                                                              | 0.0                                                              | 0.0                                                            | 35.4                                                                           | -0.3                                                  | 0.678                 |
| Mixed Forests                | 83.5                                                              | 48.3                                                                        | 0.0                                                                | 0.1                                                              | 0.0                                                              | 0.0                                                            | 83.5                                                                           | -2.3                                                  | 0.000                 |
| Closed Shrublands            | 231.2                                                             | 128.0                                                                       | 0.0                                                                | 0.0                                                              | 0.0                                                              | 0.0                                                            | 231.2                                                                          | 5.1                                                   | 0.003                 |
| Open Shrublands              | 1,073,504.8                                                       | 110,501.5                                                                   | 1,017.7                                                            | 300.8                                                            | 0.2                                                              | 0.7                                                            | 1,074,522.6                                                                    | 1,268.4                                               | 0.428                 |
| Woody Savannas               | 3,473.7                                                           | 1,471.0                                                                     | 0.0                                                                | 0.3                                                              | 0.0                                                              | 0.0                                                            | 3,473.8                                                                        | -52.2                                                 | 0.011                 |
| Savannas                     | 4,381.2                                                           | 3,867.6                                                                     | 2.0                                                                | 2.1                                                              | 0.0                                                              | 0.0                                                            | 4,383.2                                                                        | -103.1                                                | 0.060                 |
| Grasslands                   | 1,032,743.3                                                       | 99,680.9                                                                    | 5,836.9                                                            | 1,797.5                                                          | 1.2                                                              | 2.2                                                            | 1,038,581.4                                                                    | -3,518.9                                              | 0.012                 |
| Croplands                    | 228,444.5                                                         | 29,256.5                                                                    | 1,527.1                                                            | 1,140.7                                                          | 0.4                                                              | 1.4                                                            | 229,972.0                                                                      | -1,463.9                                              | 0.000                 |
| Barren                       | 5,000,492.0                                                       | 158,500.1                                                                   | 115,200.6                                                          | 9,591.5                                                          | 17.1                                                             | 16.8                                                           | 5,115,709.7                                                                    | 2,519.1                                               | 0.279                 |

<sup>a</sup> Standard deviation

**Table S16: Statistics on the total area of soils with an  $EC_e$  between certain thresholds in the 1980 - 2018 period at the biome level.** This table also shows information about the biome-level trends in the total area of soils with an  $EC_e \geq 4 \text{ dS m}^{-1}$  since 1980 and their statistical significance (each class includes its left class edge).

| Biome                                                        | $EC_e$                                                  |                                                       |                                                          |                                                        |                                                           |                                                         |                                                                         |                                                     |                          |
|--------------------------------------------------------------|---------------------------------------------------------|-------------------------------------------------------|----------------------------------------------------------|--------------------------------------------------------|-----------------------------------------------------------|---------------------------------------------------------|-------------------------------------------------------------------------|-----------------------------------------------------|--------------------------|
|                                                              | Mean, $EC_e$ 4 - 8 $\text{dS m}^{-1}$ ( $\text{km}^2$ ) | SD, $EC_e$ 4 - 8 $\text{dS m}^{-1}$ ( $\text{km}^2$ ) | Mean, $EC_e$ 8 - 16 $\text{dS m}^{-1}$ ( $\text{km}^2$ ) | SD, $EC_e$ 8 - 16 $\text{dS m}^{-1}$ ( $\text{km}^2$ ) | Mean, $EC_e \geq 16$ $\text{dS m}^{-1}$ ( $\text{km}^2$ ) | SD, $EC_e \geq 16$ $\text{dS m}^{-1}$ ( $\text{km}^2$ ) | Mean of saline area, $EC_e \geq 4$ $\text{dS m}^{-1}$ ( $\text{km}^2$ ) | 1980 - 2018 trend ( $\text{km}^2 \text{ yr}^{-1}$ ) | $p$ -value (1980 - 2018) |
| Deserts and Xeric Shrublands                                 | 5,402,957.2                                             | 434,427.8                                             | 1,854,798.2                                              | 284,550.9                                              | 356,676.0                                                 | 116,349.0                                               | 7,614,431.4                                                             | -13,300.2                                           | 0.085                    |
| Flooded Grasslands and Savannas                              | 85,444.4                                                | 24,048.8                                              | 34,070.8                                                 | 4,060.5                                                | 4,737.1                                                   | 1,330.5                                                 | 124,252.3                                                               | -1,941.6                                            | 0.000                    |
| Mangroves                                                    | 27,773.9                                                | 5,585.1                                               | 5,402.7                                                  | 1,003.0                                                | 47.7                                                      | 59.7                                                    | 33,224.3                                                                | -254.6                                              | 0.002                    |
| Mediterranean Forests, Woodlands and Scrub                   | 152,534.2                                               | 23,283.3                                              | 26,783.9                                                 | 7,987.4                                                | 6,883.4                                                   | 3,243.9                                                 | 186,201.5                                                               | -1,315.4                                            | 0.001                    |
| Montane Grasslands and Shrublands                            | 243,040.0                                               | 18,332.3                                              | 42,733.1                                                 | 12,717.5                                               | 5,910.1                                                   | 2,591.7                                                 | 291,683.1                                                               | -835.2                                              | 0.011                    |
| Temperate Broadleaf and Mixed Forests                        | 144,539.4                                               | 50,965.8                                              | 15,098.6                                                 | 4,907.8                                                | 6,233.1                                                   | 2,518.8                                                 | 165,871.1                                                               | -4,044.7                                            | 0.000                    |
| Temperate Conifer Forests                                    | 52,836.1                                                | 11,162.5                                              | 3,965.3                                                  | 1,381.7                                                | 945.9                                                     | 384.3                                                   | 57,747.3                                                                | -911.5                                              | 0.000                    |
| Temperate Grasslands, Savannas and Shrublands                | 320,498.4                                               | 50,867.7                                              | 33,101.5                                                 | 9,013.1                                                | 7,243.3                                                   | 2,747.7                                                 | 360,843.2                                                               | -2,771.7                                            | 0.000                    |
| Tropical and Subtropical Coniferous Forests                  | 2,867.4                                                 | 789.4                                                 | 408.1                                                    | 235.7                                                  | 9.5                                                       | 12.1                                                    | 3,285.0                                                                 | -39.1                                               | 0.000                    |
| Tropical and Subtropical Dry Broadleaf Forests               | 88,770.6                                                | 23,136.6                                              | 5,546.4                                                  | 1,687.3                                                | 141.8                                                     | 123.8                                                   | 94,458.7                                                                | -664.2                                              | 0.056                    |
| Tropical and Subtropical Grasslands, Savannas and Shrublands | 696,230.8                                               | 92,651.8                                              | 368,470.1                                                | 41,665.8                                               | 48,707.3                                                  | 15,603.3                                                | 1,113,408.2                                                             | -7,071.2                                            | 0.000                    |
| Tropical and Subtropical Moist Broadleaf Forests             | 992,815.8                                               | 254,469.2                                             | 24,965.9                                                 | 14,011.8                                               | 85.2                                                      | 310.3                                                   | 1,017,866.8                                                             | 11,638.1                                            | 0.001                    |

**Table S17: Statistics on the total area of soils with an ESP between certain thresholds in the 1980 - 2018 period at the biome level.** This table also contains information about the biome-level trends in the total area of soils with an ESP  $\geq$  6% since 1980 and their statistical significance (each class includes its left class edge).

| ESP                                                          |                                            |                                          |                                                |                                                 |                                                  |                                             |                                                               |                                                             |                             |
|--------------------------------------------------------------|--------------------------------------------|------------------------------------------|------------------------------------------------|-------------------------------------------------|--------------------------------------------------|---------------------------------------------|---------------------------------------------------------------|-------------------------------------------------------------|-----------------------------|
| Biome                                                        | Mean, ESP<br>6 - 15%<br>(km <sup>2</sup> ) | SD, ESP<br>6 - 15%<br>(km <sup>2</sup> ) | Mean,<br>ESP<br>15 - 30%<br>(km <sup>2</sup> ) | SD,<br>ESP<br>15 -<br>30%<br>(km <sup>2</sup> ) | Mean,<br>ESP $\geq$<br>30%<br>(km <sup>2</sup> ) | SD, ESP<br>$\geq$ 30%<br>(km <sup>2</sup> ) | Mean of<br>sodic area,<br>ESP $\geq$ 6%<br>(km <sup>2</sup> ) | 1980 - 2018<br>trend<br>(km <sup>2</sup> yr <sup>-1</sup> ) | p-value<br>(1980 -<br>2018) |
| Deserts and Xeric Shrublands                                 | 8,865,009.9                                | 240,647.5                                | 121,507.3                                      | 13,231.2                                        | 12.7                                             | 21.0                                        | 8,986,529.8                                                   | 5,458.4                                                     | 0.120                       |
| Flooded Grasslands and Savannas                              | 97,621.6                                   | 8,122.4                                  | 1,536.0                                        | 574.5                                           | 0.0                                              | 0.0                                         | 99,157.7                                                      | -296.9                                                      | 0.009                       |
| Mangroves                                                    | 6,269.6                                    | 632.1                                    | 60.0                                           | 49.8                                            | 0.0                                              | 0.0                                         | 6,329.6                                                       | -8.6                                                        | 0.339                       |
| Mediterranean Forests, Woodlands and Scrub                   | 185,835.7                                  | 18,231.2                                 | 681.0                                          | 441.2                                           | 0.2                                              | 0.6                                         | 186,516.9                                                     | -115.6                                                      | 0.664                       |
| Montane Grasslands and Shrublands                            | 903,607.4                                  | 46,474.4                                 | 120,237.8                                      | 9,995.9                                         | 18.9                                             | 18.4                                        | 1,023,864.0                                                   | 1,271.3                                                     | 0.082                       |
| Temperate Broadleaf and Mixed Forests                        | 183,566.4                                  | 21,192.3                                 | 3,317.3                                        | 1,608.2                                         | 0.0                                              | 0.1                                         | 186,883.7                                                     | 1,037.7                                                     | 0.000                       |
| Temperate Conifer Forests                                    | 63,595.0                                   | 4,002.7                                  | 1,436.9                                        | 436.8                                           | 0.2                                              | 0.6                                         | 65,032.0                                                      | 191.1                                                       | 0.000                       |
| Temperate Grasslands, Savannas and Shrublands                | 759,323.5                                  | 114,238.6                                | 690.8                                          | 391.3                                           | 0.6                                              | 1.5                                         | 760,015.0                                                     | 1,986.6                                                     | 0.227                       |
| Tropical and Subtropical Coniferous Forests                  | 2,342.5                                    | 769.5                                    | 0.0                                            | 0.0                                             | 0.0                                              | 0.0                                         | 2,342.5                                                       | -33.5                                                       | 0.001                       |
| Tropical and Subtropical Dry Broadleaf Forests               | 50,892.0                                   | 20,114.1                                 | 1.5                                            | 4.8                                             | 0.0                                              | 0.0                                         | 50,893.6                                                      | -686.0                                                      | 0.014                       |
| Tropical and Subtropical Grasslands, Savannas and Shrublands | 317,844.9                                  | 87,560.4                                 | 402.5                                          | 299.4                                           | 0.1                                              | 0.2                                         | 318,247.5                                                     | -4,180.4                                                    | 0.000                       |
| Tropical and Subtropical Moist Broadleaf Forests             | 15,013.0                                   | 7,338.5                                  | 36.5                                           | 66.0                                            | 0.1                                              | 0.3                                         | 15,049.6                                                      | -98.3                                                       | 0.354                       |

**Table S18: Statistics on the total area of soils with an EC<sub>e</sub> between certain thresholds in the 1980 - 2018 period at the climate level.** This table also shows information about the climate-level trends in the total area of soils with an EC<sub>e</sub> ≥ 4 dS m<sup>-1</sup> since 1980 and their statistical significance (each class includes its left class edge). For the full name of the climate zones see [Figure S12](#).

| Climate | EC <sub>e</sub>                                                   |                                                                 |                                                                    |                                                                  |                                                                  |                                                                |                                                                                |                                                       | p-value (1980 - 2018) |
|---------|-------------------------------------------------------------------|-----------------------------------------------------------------|--------------------------------------------------------------------|------------------------------------------------------------------|------------------------------------------------------------------|----------------------------------------------------------------|--------------------------------------------------------------------------------|-------------------------------------------------------|-----------------------|
|         | Mean, EC <sub>e</sub> 4 - 8 dS m <sup>-1</sup> (km <sup>2</sup> ) | SD, EC <sub>e</sub> 4 - 8 dS m <sup>-1</sup> (km <sup>2</sup> ) | Mean, EC <sub>e</sub> 8 - 16 dS m <sup>-1</sup> (km <sup>2</sup> ) | SD, EC <sub>e</sub> 8 - 16 dS m <sup>-1</sup> (km <sup>2</sup> ) | Mean, EC <sub>e</sub> ≥ 16 dS m <sup>-1</sup> (km <sup>2</sup> ) | SD, EC <sub>e</sub> ≥ 16 dS m <sup>-1</sup> (km <sup>2</sup> ) | Mean of saline area, EC <sub>e</sub> ≥ 4 dS m <sup>-1</sup> (km <sup>2</sup> ) | 1980 - 2018 trend (km <sup>2</sup> yr <sup>-1</sup> ) |                       |
| AW      | 297,081.99                                                        | 74,633.23                                                       | 19,561.43                                                          | 5,771.02                                                         | 117.71                                                           | 115.47                                                         | 316,761.13                                                                     | -2,145.8                                              | 0.046                 |
| Af      | 541,186.77                                                        | 196,155.54                                                      | 2,035.31                                                           | 3,250.37                                                         | 18.66                                                            | 70.64                                                          | 543,240.74                                                                     | 9,737.9                                               | 0.000                 |
| Am      | 280,332.75                                                        | 59,046.66                                                       | 16,546.19                                                          | 9,773.84                                                         | 62.93                                                            | 197.40                                                         | 296,941.87                                                                     | 2,383.3                                               | 0.006                 |
| As      | 11,671.52                                                         | 5,684.02                                                        | 1,090.04                                                           | 497.14                                                           | 3.17                                                             | 5.62                                                           | 12,764.74                                                                      | -254.6                                                | 0.002                 |
| BSh     | 409,557.19                                                        | 84,311.35                                                       | 216,775.80                                                         | 98,817.24                                                        | 30,056.33                                                        | 17,035.57                                                      | 656,389.32                                                                     | -9,150.2                                              | 0.000                 |
| BWh     | 4,245,174.05                                                      | 429,867.83                                                      | 1,677,044.14                                                       | 197,420.42                                                       | 326,347.89                                                       | 107,275.99                                                     | 6,248,566.08                                                                   | -10,717.6                                             | 0.081                 |
| Bsk     | 571,005.65                                                        | 55,111.88                                                       | 35,192.30                                                          | 17,223.06                                                        | 5,502.52                                                         | 3,966.61                                                       | 611,700.47                                                                     | -2,760.9                                              | 0.002                 |
| Bwk     | 1,418,580.40                                                      | 61,572.82                                                       | 417,484.26                                                         | 56,922.10                                                        | 69,824.86                                                        | 16,669.50                                                      | 1,905,889.51                                                                   | -1,276.2                                              | 0.358                 |
| CSb     | 14,854.89                                                         | 2,464.72                                                        | 494.31                                                             | 870.16                                                           | 54.98                                                            | 256.01                                                         | 15,404.18                                                                      | -149.5                                                | 0.000                 |
| Cfa     | 75,351.50                                                         | 16,775.68                                                       | 8,282.03                                                           | 1,729.48                                                         | 2,514.85                                                         | 721.54                                                         | 86,148.39                                                                      | -312.4                                                | 0.225                 |
| Cfb     | 19,047.57                                                         | 3,591.70                                                        | 153.90                                                             | 98.44                                                            | 17.14                                                            | 21.44                                                          | 19,218.61                                                                      | -99.3                                                 | 0.055                 |
| Cfc     | 318.11                                                            | 402.30                                                          | 1.03                                                               | 3.02                                                             | 0.04                                                             | 0.16                                                           | 319.18                                                                         | -20.7                                                 | 0.000                 |
| Csa     | 38,271.52                                                         | 12,398.11                                                       | 3,368.09                                                           | 1,580.96                                                         | 625.74                                                           | 523.26                                                         | 42,265.35                                                                      | -750.3                                                | 0.000                 |
| Csc     | 205.03                                                            | 228.71                                                          | 2.12                                                               | 7.83                                                             | 0.44                                                             | 1.58                                                           | 207.60                                                                         | -17.1                                                 | 0.000                 |
| Cwa     | 42,075.57                                                         | 12,256.45                                                       | 110.50                                                             | 99.56                                                            | 0.75                                                             | 4.15                                                           | 42,186.82                                                                      | -527.5                                                | 0.002                 |
| Cwb     | 12,599.48                                                         | 4,065.05                                                        | 214.13                                                             | 356.74                                                           | 38.96                                                            | 110.96                                                         | 12,852.56                                                                      | -252.2                                                | 0.000                 |
| Cwc     | 2,370.27                                                          | 426.20                                                          | 232.13                                                             | 192.56                                                           | 26.29                                                            | 46.03                                                          | 2,628.69                                                                       | -10.1                                                 | 0.092                 |
| Dfa     | 11,833.93                                                         | 3,300.65                                                        | 4.43                                                               | 5.75                                                             | 0.21                                                             | 1.30                                                           | 11,838.57                                                                      | 41.3                                                  | 0.386                 |
| Dfb     | 92,024.22                                                         | 32,921.59                                                       | 74.00                                                              | 34.19                                                            | 14.27                                                            | 10.94                                                          | 92,112.48                                                                      | -2,197.0                                              | 0.000                 |
| Dfc     | 65,091.16                                                         | 16,722.42                                                       | 427.59                                                             | 290.20                                                           | 108.94                                                           | 56.98                                                          | 65,627.69                                                                      | -1,246.9                                              | 0.000                 |
| Dsa     | 5,892.86                                                          | 2,987.85                                                        | 97.79                                                              | 173.30                                                           | 11.77                                                            | 28.15                                                          | 6,002.42                                                                       | -171.5                                                | 0.000                 |
| Dsb     | 11,391.52                                                         | 4,213.15                                                        | 103.00                                                             | 198.65                                                           | 31.41                                                            | 62.26                                                          | 11,525.92                                                                      | -210.1                                                | 0.000                 |
| Dsc     | 1,235.83                                                          | 412.55                                                          | 19.67                                                              | 55.44                                                            | 2.93                                                             | 6.88                                                           | 1,258.43                                                                       | 1.8                                                   | 0.775                 |
| Dwa     | 13,587.65                                                         | 9,593.01                                                        | 10.32                                                              | 17.22                                                            | 0.00                                                             | 0.00                                                           | 13,597.97                                                                      | -498.3                                                | 0.000                 |
| Dwb     | 38,645.93                                                         | 41,051.29                                                       | 0.79                                                               | 2.53                                                             | 0.02                                                             | 0.12                                                           | 38,646.75                                                                      | -2,874.8                                              | 0.000                 |
| Dwc     | 18,647.40                                                         | 7,578.91                                                        | 885.67                                                             | 187.83                                                           | 22.08                                                            | 33.71                                                          | 19,555.15                                                                      | -522.2                                                | 0.000                 |
| EF      | 109.29                                                            | 54.77                                                           | 13.92                                                              | 14.72                                                            | 1.37                                                             | 2.51                                                           | 124.58                                                                         | -0.6                                                  | 0.499                 |
| ET      | 72,479.87                                                         | 9,945.22                                                        | 21,437.79                                                          | 5,826.41                                                         | 2,996.06                                                         | 1,048.90                                                       | 96,913.73                                                                      | 253.8                                                 | 0.117                 |



**Table S19: Statistics on the total area of soils with an ESP between certain thresholds in the 1980 - 2018 period at the climate level.** This table also contains information about the climate-level trends in the total area of soils with an ESP  $\geq 6\%$  since 1980 and their statistical significance (each class includes its left class edge). For the full name of the climate zones see [Figure S12](#).

| ESP     |                                      |                                    |                                       |                                     |                                          |                                        |                                                       |                                                       |                               |
|---------|--------------------------------------|------------------------------------|---------------------------------------|-------------------------------------|------------------------------------------|----------------------------------------|-------------------------------------------------------|-------------------------------------------------------|-------------------------------|
| Climate | Mean, ESP 6 - 15% (km <sup>2</sup> ) | SD, ESP 6 - 15% (km <sup>2</sup> ) | Mean, ESP 15 - 30% (km <sup>2</sup> ) | SD, ESP 15 - 30% (km <sup>2</sup> ) | Mean, ESP $\geq 30\%$ (km <sup>2</sup> ) | SD, ESP $\geq 30\%$ (km <sup>2</sup> ) | Mean of sodic area, ESP $\geq 6\%$ (km <sup>2</sup> ) | 1980 - 2018 trend (km <sup>2</sup> yr <sup>-1</sup> ) | <i>p</i> -value (1980 - 2018) |
| AW      | 66,723.39                            | 52,393.80                          | 34.39                                 | 75.12                               | 0.04                                     | 0.19                                   | 66,757.81                                             | -1,874.5                                              | 0.010                         |
| Af      | 783.47                               | 544.49                             | 0.00                                  | 0.00                                | 0.00                                     | 0.00                                   | 783.47                                                | 10.4                                                  | 0.181                         |
| Am      | 1,035.27                             | 1,495.96                           | 0.00                                  | 0.00                                | 0.00                                     | 0.00                                   | 1,035.27                                              | -6.6                                                  | 0.763                         |
| As      | 2,022.62                             | 728.97                             | 0.00                                  | 0.00                                | 0.00                                     | 0.00                                   | 2,022.62                                              | 3.2                                                   | 0.764                         |
| BSh     | 477,114.91                           | 48,531.17                          | 2,153.58                              | 925.53                              | 0.29                                     | 0.82                                   | 479,268.78                                            | -945.0                                                | 0.178                         |
| BWh     | 5,103,247.28                         | 230,356.67                         | 24,666.78                             | 5,859.54                            | 0.44                                     | 1.35                                   | 5,127,914.50                                          | 5,231.9                                               | 0.117                         |
| Bsk     | 1,446,213.25                         | 104,661.58                         | 10,955.36                             | 2,601.10                            | 9.63                                     | 18.39                                  | 1,457,178.24                                          | 785.3                                                 | 0.607                         |
| Bwk     | 3,442,886.47                         | 39,033.27                          | 92,799.41                             | 12,339.29                           | 1.91                                     | 2.93                                   | 3,535,687.80                                          | 678.2                                                 | 0.235                         |
| CSb     | 27,319.54                            | 5,758.71                           | 3.51                                  | 3.27                                | 0.00                                     | 0.00                                   | 27,323.05                                             | 170.3                                                 | 0.036                         |
| Cfa     | 24,097.24                            | 4,831.52                           | 41.32                                 | 48.22                               | 0.03                                     | 0.15                                   | 24,138.60                                             | 61.9                                                  | 0.376                         |
| Cfb     | 11,965.59                            | 2,085.80                           | 270.49                                | 284.62                              | 0.17                                     | 0.80                                   | 12,236.24                                             | 87.9                                                  | 0.002                         |
| Cfc     | 314.84                               | 138.80                             | 0.03                                  | 0.12                                | 0.00                                     | 0.00                                   | 314.87                                                | 3.9                                                   | 0.045                         |
| Csa     | 75,978.28                            | 13,442.30                          | 146.73                                | 75.03                               | 0.45                                     | 2.13                                   | 76,125.46                                             | 714.9                                                 | 0.000                         |
| Csc     | 366.19                               | 146.14                             | 0.00                                  | 0.00                                | 0.00                                     | 0.00                                   | 366.19                                                | 5.5                                                   | 0.006                         |
| Cwa     | 27,282.22                            | 4,382.41                           | 222.44                                | 291.63                              | 0.00                                     | 0.00                                   | 27,504.65                                             | -74.4                                                 | 0.243                         |
| Cwb     | 5,191.37                             | 768.95                             | 0.39                                  | 0.64                                | 0.00                                     | 0.00                                   | 5,191.77                                              | -14.8                                                 | 0.179                         |
| Cwc     | 2,703.67                             | 422.31                             | 1.83                                  | 7.81                                | 0.00                                     | 0.00                                   | 2,705.49                                              | 28.4                                                  | 0.000                         |
| Dfa     | 37,722.40                            | 11,566.32                          | 0.51                                  | 1.74                                | 0.00                                     | 0.00                                   | 37,722.91                                             | -31.5                                                 | 0.851                         |
| Dfb     | 118,230.61                           | 42,891.06                          | 35.32                                 | 21.50                               | 0.01                                     | 0.09                                   | 118,265.94                                            | -804.6                                                | 0.191                         |
| Dfc     | 8,092.44                             | 2,012.67                           | 21.38                                 | 16.93                               | 0.00                                     | 0.00                                   | 8,113.82                                              | -29.2                                                 | 0.316                         |
| Dsa     | 9,946.86                             | 2,348.92                           | 0.05                                  | 0.34                                | 0.00                                     | 0.00                                   | 9,946.91                                              | 15.8                                                  | 0.643                         |
| Dsb     | 9,917.17                             | 3,429.96                           | 0.07                                  | 0.21                                | 0.00                                     | 0.00                                   | 9,917.24                                              | -190.0                                                | 0.000                         |
| Dsc     | 832.18                               | 190.24                             | 0.15                                  | 0.50                                | 0.00                                     | 0.00                                   | 832.33                                                | -7.1                                                  | 0.007                         |
| Dwa     | 8,514.13                             | 3,174.45                           | 0.84                                  | 5.26                                | 0.00                                     | 0.00                                   | 8,514.97                                              | -79.8                                                 | 0.077                         |
| Dwb     | 13,590.04                            | 10,218.55                          | 0.00                                  | 0.00                                | 0.00                                     | 0.00                                   | 13,590.04                                             | 259.2                                                 | 0.074                         |
| Dwc     | 17,752.58                            | 3,039.78                           | 34.44                                 | 12.33                               | 0.00                                     | 0.00                                   | 17,787.02                                             | -27.8                                                 | 0.528                         |
| EF      | 195.73                               | 193.41                             | 0.02                                  | 0.11                                | 0.00                                     | 0.00                                   | 195.74                                                | -2.9                                                  | 0.291                         |
| ET      | 544,214.49                           | 33,185.41                          | 119,381.63                            | 9,766.84                            | 19.73                                    | 19.00                                  | 663,615.85                                            | 550.3                                                 | 0.329                         |

**Table S20: Statistics on the total area of soils with an EC<sub>e</sub> between certain thresholds in the 1980 - 2018 period at the continent level.** This table also shows information about the continent-level trends in the total area of soils with an EC<sub>e</sub> ≥ 4 dS m<sup>-1</sup> since 1980 and 1999 and the corresponding statistical significance (each class includes its left class edge).

| Continent                                                                      | Africa       | Asia         | Australia    | Europe    | North America | South America |
|--------------------------------------------------------------------------------|--------------|--------------|--------------|-----------|---------------|---------------|
| Mean, EC <sub>e</sub> 4 - 8 dS m <sup>-1</sup> (km <sup>2</sup> )              | 2,128,611.23 | 3,694,834.77 | 1,209,129.26 | 57,763.38 | 243,792.83    | 945,111.33    |
| SD, EC <sub>e</sub> 4 - 8 dS m <sup>-1</sup> (km <sup>2</sup> )                | 244,655.94   | 311,957.67   | 217,864.27   | 10,122.29 | 50,681.79     | 249,556.22    |
| Mean, EC <sub>e</sub> 8 - 16 dS m <sup>-1</sup> (km <sup>2</sup> )             | 785,682.43   | 1,038,846.99 | 532,286.04   | 101.79    | 31,727.17     | 25,199.79     |
| SD, EC <sub>e</sub> 8 - 16 dS m <sup>-1</sup> (km <sup>2</sup> )               | 79,069.54    | 121,000.08   | 193,677.91   | 62.10     | 7,402.80      | 13,599.98     |
| Mean, EC <sub>e</sub> ≥ 16 dS m <sup>-1</sup> (km <sup>2</sup> )               | 159,847.99   | 181,227.37   | 90,395.53    | 13.89     | 4,282.98      | 1,938.54      |
| SD, EC <sub>e</sub> ≥ 16 dS m <sup>-1</sup> (km <sup>2</sup> )                 | 46,494.72    | 64,174.65    | 35,886.55    | 14.01     | 1,750.71      | 3,242.45      |
| Mean of saline area, EC <sub>e</sub> ≥ 4 dS m <sup>-1</sup> (km <sup>2</sup> ) | 3,074,141.66 | 4,914,909.12 | 1,831,810.83 | 57,879.06 | 279,802.98    | 972,249.67    |
| 1980 - 2018 trend (km <sup>2</sup> yr <sup>-1</sup> )                          | -2,724.26    | -22,663.81   | -4,573.79    | 139.97    | -3,092.30     | 9,466.74      |
| <i>p</i> -value (1980 - 2018)                                                  | 0.49         | < 0.01       | 0.20         | 0.34      | < 0.01        | < 0.01        |
| 1999 - 2018 trend (km <sup>2</sup> yr <sup>-1</sup> )                          | 23,166.34    | 19,933.41    | 18,532.56    | -165.41   | 3,077.91      | 1,372.62      |
| <i>p</i> -value (1999 - 2018)                                                  | < 0.05       | 0.06         | 0.06         | 0.74      | < 0.01        | 0.88          |

**Table S21: Statistics on the total area of soils with an ESP between certain thresholds in the 1980 - 2018 period at the continent level.** This table also contains information about the continent-level trends in the total area of soils with an ESP ≥ 6% since 1980 and 1999 and the corresponding statistical significance (each class includes its left class edge).

| Continent                                             | Africa       | Asia         | Australia  | Europe    | North America | South America |
|-------------------------------------------------------|--------------|--------------|------------|-----------|---------------|---------------|
| Mean, ESP 6 - 15% (km <sup>2</sup> )                  | 1,875,394.56 | 7,585,807.83 | 838,087.86 | 55,355.12 | 499,594.85    | 612,090.06    |
| SD, ESP 6 - 15% (km <sup>2</sup> )                    | 183,184.69   | 170,525.82   | 125,561.82 | 18,357.54 | 31,844.39     | 56,079.12     |
| Mean, ESP 15 - 30% (km <sup>2</sup> )                 | 1,715.51     | 231,208.24   | 3,211.83   | 0.95      | 13,876.67     | 504.01        |
| SD, ESP 15 - 30% (km <sup>2</sup> )                   | 361.10       | 18,398.63    | 1,291.58   | 2.38      | 3,116.81      | 397.25        |
| Mean, ESP ≥ 30% (km <sup>2</sup> )                    | 0.15         | 21.29        | 0.00       | 0.02      | 11.14         | 0.12          |
| SD, ESP ≥ 30% (km <sup>2</sup> )                      | 0.43         | 19.64        | 0.00       | 0.10      | 20.96         | 0.76          |
| Mean of sodic area, ESP ≥ 6% (km <sup>2</sup> )       | 1,877,110.22 | 7,817,037.36 | 841,299.68 | 55,356.09 | 513,482.66    | 612,594.18    |
| 1980 - 2018 trend (km <sup>2</sup> yr <sup>-1</sup> ) | -3,860.03    | 5,616.02     | -485.28    | -215.59   | 1,652.23      | 1,813.94      |
| <i>p</i> -value (1980 - 2018)                         | 0.14         | < 0.05       | 0.79       | 0.42      | < 0.01        | < 0.05        |
| 1999 - 2018 trend (km <sup>2</sup> yr <sup>-1</sup> ) | 12,990.22    | 15,112.59    | 1,978.87   | 1,488.74  | 1,135.92      | 6,094.53      |
| <i>p</i> -value (1999 - 2018)                         | < 0.01       | < 0.05       | 0.71       | < 0.05    | 0.23          | < 0.01        |

**Table S22: Statistics on the total area of soils with an EC<sub>e</sub> between certain thresholds in the 1980 - 2018 period at the country level.** This table also shows information about the country-level trends in the total area of soils with an EC<sub>e</sub> ≥ 4 dS m<sup>-1</sup> since 1980 and the corresponding statistical significance (each class includes its left class edge).

| Country                          | Mean, EC <sub>e</sub> 4 - 8 dS m <sup>-1</sup> (km <sup>2</sup> ) | SD, EC <sub>e</sub> 4 - 8 dS m <sup>-1</sup> (km <sup>2</sup> ) | Mean, EC <sub>e</sub> 8 - 16 dS m <sup>-1</sup> (km <sup>2</sup> ) | SD, EC <sub>e</sub> 8 - 16 dS m <sup>-1</sup> (km <sup>2</sup> ) | Mean, EC <sub>e</sub> ≥ 16 dS m <sup>-1</sup> (km <sup>2</sup> ) | SD, EC <sub>e</sub> ≥ 16 dS m <sup>-1</sup> (km <sup>2</sup> ) | Mean of saline area, EC <sub>e</sub> ≥ 4 dS m <sup>-1</sup> (km <sup>2</sup> ) | 1980 - 2018 trend (km <sup>2</sup> yr <sup>-1</sup> ) | p-value (1980 - 2018) |
|----------------------------------|-------------------------------------------------------------------|-----------------------------------------------------------------|--------------------------------------------------------------------|------------------------------------------------------------------|------------------------------------------------------------------|----------------------------------------------------------------|--------------------------------------------------------------------------------|-------------------------------------------------------|-----------------------|
| Afghanistan                      | 154,952.93                                                        | 15,910.35                                                       | 26,452.15                                                          | 7,514.74                                                         | 4,375.77                                                         | 6,893.46                                                       | 185,780.85                                                                     | 263.2                                                 | 0.296                 |
| Akrotiri and Dhekelia            | 3.66                                                              | 1.82                                                            | 0.00                                                               | 0.00                                                             | 0.00                                                             | 0.00                                                           | 3.66                                                                           | 0.0                                                   | 0.253                 |
| Albania                          | 135.44                                                            | 59.13                                                           | 25.88                                                              | 10.53                                                            | 0.00                                                             | 0.00                                                           | 161.32                                                                         | -0.3                                                  | 0.717                 |
| Algeria                          | 397,251.03                                                        | 60,983.19                                                       | 0.00                                                               | 0.00                                                             | 0.00                                                             | 0.00                                                           | 397,251.03                                                                     | 984.4                                                 | 0.262                 |
| Angola                           | 7,073.69                                                          | 2,709.56                                                        | 3,352.82                                                           | 776.92                                                           | 108.71                                                           | 140.61                                                         | 10,535.21                                                                      | 137.6                                                 | 0.002                 |
| Anguilla                         | 2.94                                                              | 3.45                                                            | 0.29                                                               | 0.48                                                             | 0.00                                                             | 0.00                                                           | 3.23                                                                           | -0.1                                                  | 0.062                 |
| Antigua and Barbuda              | 30.53                                                             | 23.57                                                           | 1.67                                                               | 4.17                                                             | 0.08                                                             | 0.52                                                           | 32.28                                                                          | -0.3                                                  | 0.414                 |
| Argentina                        | 157,583.30                                                        | 23,789.40                                                       | 4,826.04                                                           | 6,284.36                                                         | 592.67                                                           | 2,006.17                                                       | 163,002.01                                                                     | -942.4                                                | 0.011                 |
| Armenia                          | 142.59                                                            | 42.68                                                           | 0.22                                                               | 0.55                                                             | 0.00                                                             | 0.00                                                           | 142.81                                                                         | 0.1                                                   | 0.813                 |
| Aruba                            | 1.97                                                              | 1.89                                                            | 0.00                                                               | 0.00                                                             | 0.00                                                             | 0.00                                                           | 1.97                                                                           | 0.0                                                   | 0.070                 |
| Australia                        | 1,210,798.30                                                      | 217,933.19                                                      | 532,833.12                                                         | 193,709.07                                                       | 90,402.19                                                        | 35,891.29                                                      | 1,834,033.61                                                                   | -4,613.3                                              | 0.193                 |
| Austria                          | 63.46                                                             | 55.14                                                           | 0.04                                                               | 0.28                                                             | 0.00                                                             | 0.00                                                           | 63.51                                                                          | -0.2                                                  | 0.830                 |
| Azerbaijan                       | 5,919.39                                                          | 2,139.13                                                        | 6.37                                                               | 6.28                                                             | 0.17                                                             | 0.86                                                           | 5,925.94                                                                       | -93.3                                                 | 0.001                 |
| Bahamas                          | 3,528.15                                                          | 695.46                                                          | 739.42                                                             | 425.27                                                           | 22.32                                                            | 26.87                                                          | 4,289.89                                                                       | -25.2                                                 | 0.001                 |
| Bahrain                          | 252.76                                                            | 69.14                                                           | 164.68                                                             | 58.28                                                            | 19.98                                                            | 24.82                                                          | 437.42                                                                         | -0.5                                                  | 0.178                 |
| Bangladesh                       | 2,116.78                                                          | 1,632.50                                                        | 22.10                                                              | 45.19                                                            | 0.00                                                             | 0.00                                                           | 2,138.88                                                                       | -119.1                                                | 0.000                 |
| Barbados                         | 5.36                                                              | 4.89                                                            | 0.00                                                               | 0.00                                                             | 0.00                                                             | 0.00                                                           | 5.36                                                                           | -0.2                                                  | 0.002                 |
| Belarus                          | 39.23                                                             | 24.61                                                           | 1.27                                                               | 3.00                                                             | 0.07                                                             | 0.21                                                           | 40.56                                                                          | -1.0                                                  | 0.005                 |
| Belgium                          | 106.55                                                            | 85.05                                                           | 3.22                                                               | 4.66                                                             | 1.29                                                             | 1.67                                                           | 111.06                                                                         | 1.9                                                   | 0.141                 |
| Belize                           | 256.93                                                            | 162.94                                                          | 0.48                                                               | 0.55                                                             | 0.00                                                             | 0.00                                                           | 257.41                                                                         | -4.9                                                  | 0.033                 |
| Benin                            | 534.80                                                            | 701.34                                                          | 131.37                                                             | 71.01                                                            | 0.07                                                             | 0.41                                                           | 666.24                                                                         | -14.7                                                 | 0.154                 |
| Bhutan                           | 422.53                                                            | 287.16                                                          | 6.04                                                               | 12.47                                                            | 0.47                                                             | 2.34                                                           | 429.03                                                                         | -19.2                                                 | 0.000                 |
| Bolivia                          | 68,937.29                                                         | 27,095.86                                                       | 1,861.11                                                           | 1,063.18                                                         | 300.04                                                           | 216.41                                                         | 71,098.43                                                                      | 580.0                                                 | 0.143                 |
| Bonaire, Sint Eustatius and Saba | 18.93                                                             | 9.26                                                            | 1.03                                                               | 1.13                                                             | 0.00                                                             | 0.00                                                           | 19.96                                                                          | -0.5                                                  | 0.000                 |
| Bosnia and Herzegovina           | 12.69                                                             | 8.59                                                            | 0.08                                                               | 0.21                                                             | 0.00                                                             | 0.00                                                           | 12.77                                                                          | -0.1                                                  | 0.353                 |
| Botswana                         | 38,058.35                                                         | 18,237.21                                                       | 9,590.68                                                           | 4,728.57                                                         | 2,723.35                                                         | 1,617.03                                                       | 50,372.38                                                                      | -980.9                                                | 0.002                 |
| Brazil                           | 413,316.80                                                        | 149,060.67                                                      | 7,736.28                                                           | 7,544.48                                                         | 3.96                                                             | 7.79                                                           | 421,057.04                                                                     | 5,637.2                                               | 0.007                 |
| British Virgin Islands           | 12.70                                                             | 4.70                                                            | 0.04                                                               | 0.18                                                             | 0.00                                                             | 0.00                                                           | 12.74                                                                          | -0.1                                                  | 0.239                 |
| Brunei                           | 1,287.17                                                          | 454.55                                                          | 0.07                                                               | 0.23                                                             | 0.00                                                             | 0.00                                                           | 1,287.24                                                                       | 3.0                                                   | 0.654                 |
| Bulgaria                         | 43.54                                                             | 44.33                                                           | 0.16                                                               | 1.02                                                             | 0.00                                                             | 0.00                                                           | 43.70                                                                          | 1.0                                                   | 0.104                 |
| Burkina Faso                     | 3,176.36                                                          | 2,389.85                                                        | 2,457.07                                                           | 1,134.33                                                         | 178.67                                                           | 222.90                                                         | 5,812.10                                                                       | -208.6                                                | 0.000                 |
| Burundi                          | 59.19                                                             | 33.42                                                           | 0.00                                                               | 0.00                                                             | 0.00                                                             | 0.00                                                           | 59.19                                                                          | -2.0                                                  | 0.000                 |
| Cambodia                         | 13,036.29                                                         | 8,492.24                                                        | 212.87                                                             | 136.97                                                           | 0.00                                                             | 0.00                                                           | 13,249.16                                                                      | -85.4                                                 | 0.489                 |
| Cameroon                         | 2,111.47                                                          | 935.22                                                          | 454.34                                                             | 194.10                                                           | 0.37                                                             | 0.88                                                           | 2,566.18                                                                       | -58.9                                                 | 0.000                 |
| Caspian Sea                      | 540.62                                                            | 139.81                                                          | 16.15                                                              | 4.75                                                             | 2.60                                                             | 2.07                                                           | 559.37                                                                         | 0.5                                                   | 0.801                 |

| Country                          | Mean, EC <sub>e</sub> 4 - 8 dS m <sup>-1</sup> (km <sup>2</sup> ) | SD, EC <sub>e</sub> 4 - 8 dS m <sup>-1</sup> (km <sup>2</sup> ) | Mean, EC <sub>e</sub> 8 - 16 dS m <sup>-1</sup> (km <sup>2</sup> ) | SD, EC <sub>e</sub> 8 - 16 dS m <sup>-1</sup> (km <sup>2</sup> ) | Mean, EC <sub>e</sub> ≥ 16 dS m <sup>-1</sup> (km <sup>2</sup> ) | SD, EC <sub>e</sub> ≥ 16 dS m <sup>-1</sup> (km <sup>2</sup> ) | Mean of saline area, EC <sub>e</sub> ≥ 4 dS m <sup>-1</sup> (km <sup>2</sup> ) | 1980 - 2018 trend (km <sup>2</sup> yr <sup>-1</sup> ) | p-value (1980 - 2018) |
|----------------------------------|-------------------------------------------------------------------|-----------------------------------------------------------------|--------------------------------------------------------------------|------------------------------------------------------------------|------------------------------------------------------------------|----------------------------------------------------------------|--------------------------------------------------------------------------------|-------------------------------------------------------|-----------------------|
| Cayman Islands                   | 30.11                                                             | 16.16                                                           | 0.00                                                               | 0.00                                                             | 0.00                                                             | 0.00                                                           | 30.11                                                                          | -0.8                                                  | 0.000                 |
| Central African Republic         | 222.74                                                            | 209.64                                                          | 1.03                                                               | 3.44                                                             | 0.00                                                             | 0.00                                                           | 223.76                                                                         | -5.4                                                  | 0.070                 |
| Chad                             | 165,824.58                                                        | 39,522.81                                                       | 68,212.55                                                          | 9,494.78                                                         | 16,069.39                                                        | 4,803.66                                                       | 250,106.51                                                                     | -906.2                                                | 0.159                 |
| Chile                            | 28,621.56                                                         | 9,396.46                                                        | 1,935.81                                                           | 2,765.11                                                         | 231.79                                                           | 716.90                                                         | 30,789.16                                                                      | -50.2                                                 | 0.712                 |
| China                            | 800,013.32                                                        | 41,439.25                                                       | 278,443.13                                                         | 20,103.35                                                        | 57,912.77                                                        | 11,581.37                                                      | 1,136,369.22                                                                   | -2,354.9                                              | 0.000                 |
| Colombia                         | 90,275.31                                                         | 46,654.57                                                       | 632.72                                                             | 343.86                                                           | 14.80                                                            | 60.91                                                          | 90,922.83                                                                      | 2,007.6                                               | 0.002                 |
| Comoros                          | 0.97                                                              | 1.19                                                            | 0.00                                                               | 0.00                                                             | 0.00                                                             | 0.00                                                           | 0.97                                                                           | -0.1                                                  | 0.001                 |
| Costa Rica                       | 295.66                                                            | 177.75                                                          | 0.13                                                               | 0.81                                                             | 0.00                                                             | 0.00                                                           | 295.79                                                                         | -3.2                                                  | 0.217                 |
| Croatia                          | 90.36                                                             | 49.44                                                           | 0.10                                                               | 0.27                                                             | 0.00                                                             | 0.00                                                           | 90.46                                                                          | 0.8                                                   | 0.263                 |
| Cuba                             | 4,014.30                                                          | 1,868.15                                                        | 43.21                                                              | 30.03                                                            | 0.00                                                             | 0.00                                                           | 4,057.51                                                                       | -34.3                                                 | 0.204                 |
| Curacao                          | 2.47                                                              | 3.55                                                            | 0.00                                                               | 0.00                                                             | 0.00                                                             | 0.00                                                           | 2.47                                                                           | -0.2                                                  | 0.000                 |
| Cyprus                           | 0.92                                                              | 1.26                                                            | 0.00                                                               | 0.00                                                             | 0.00                                                             | 0.00                                                           | 0.92                                                                           | 0.0                                                   | 0.009                 |
| Czech Republic                   | 1.53                                                              | 1.83                                                            | 0.00                                                               | 0.00                                                             | 0.00                                                             | 0.00                                                           | 1.53                                                                           | -0.1                                                  | 0.000                 |
| Côte d'Ivoire                    | 8,407.83                                                          | 4,827.58                                                        | 120.23                                                             | 136.34                                                           | 0.48                                                             | 2.86                                                           | 8,528.54                                                                       | -170.5                                                | 0.012                 |
| Democratic Republic of the Congo | 72,557.16                                                         | 30,734.60                                                       | 41.73                                                              | 35.72                                                            | 0.02                                                             | 0.14                                                           | 72,598.91                                                                      | -1,356.5                                              | 0.001                 |
| Denmark                          | 1,486.04                                                          | 431.33                                                          | 0.69                                                               | 2.32                                                             | 0.09                                                             | 0.27                                                           | 1,486.82                                                                       | 13.0                                                  | 0.032                 |
| Djibouti                         | 2,485.01                                                          | 573.64                                                          | 1,635.33                                                           | 616.20                                                           | 2.60                                                             | 8.90                                                           | 4,122.93                                                                       | 32.1                                                  | 0.038                 |
| Dominica                         | 2.88                                                              | 4.90                                                            | 0.00                                                               | 0.00                                                             | 0.00                                                             | 0.00                                                           | 2.88                                                                           | 0.1                                                   | 0.069                 |
| Dominican Republic               | 299.18                                                            | 164.98                                                          | 0.23                                                               | 0.45                                                             | 0.00                                                             | 0.00                                                           | 299.41                                                                         | -0.1                                                  | 0.969                 |
| Ecuador                          | 9,841.35                                                          | 5,164.36                                                        | 19.07                                                              | 68.77                                                            | 3.75                                                             | 13.25                                                          | 9,864.16                                                                       | 241.3                                                 | 0.000                 |
| Egypt                            | 73,666.16                                                         | 25,364.14                                                       | 26,059.94                                                          | 5,561.81                                                         | 4,922.35                                                         | 1,673.96                                                       | 104,648.45                                                                     | -1,596.8                                              | 0.000                 |
| El Salvador                      | 73.93                                                             | 25.24                                                           | 0.00                                                               | 0.00                                                             | 0.00                                                             | 0.00                                                           | 73.93                                                                          | -1.5                                                  | 0.000                 |
| Equatorial Guinea                | 224.86                                                            | 104.54                                                          | 15.44                                                              | 17.37                                                            | 0.02                                                             | 0.14                                                           | 240.33                                                                         | -2.5                                                  | 0.120                 |
| Eritrea                          | 10,902.19                                                         | 1,986.97                                                        | 3,691.25                                                           | 637.32                                                           | 123.61                                                           | 149.96                                                         | 14,717.05                                                                      | -48.1                                                 | 0.141                 |
| Estonia                          | 649.13                                                            | 502.84                                                          | 0.61                                                               | 2.47                                                             | 0.00                                                             | 0.00                                                           | 649.74                                                                         | -28.9                                                 | 0.000                 |
| Ethiopia                         | 29,209.64                                                         | 7,558.67                                                        | 28,789.31                                                          | 5,303.59                                                         | 1,030.77                                                         | 645.51                                                         | 59,029.71                                                                      | -160.2                                                | 0.182                 |
| Falkland Islands                 | 0.66                                                              | 1.49                                                            | 0.00                                                               | 0.00                                                             | 0.00                                                             | 0.00                                                           | 0.66                                                                           | -0.1                                                  | 0.000                 |
| Fiji                             | 634.93                                                            | 724.46                                                          | 0.84                                                               | 4.57                                                             | 0.02                                                             | 0.13                                                           | 635.78                                                                         | 14.2                                                  | 0.173                 |
| Finland                          | 0.02                                                              | 0.10                                                            | 0.00                                                               | 0.00                                                             | 0.00                                                             | 0.00                                                           | 0.02                                                                           | 0.0                                                   | 0.074                 |
| France                           | 789.29                                                            | 376.72                                                          | 7.65                                                               | 7.08                                                             | 0.00                                                             | 0.00                                                           | 796.94                                                                         | -20.9                                                 | 0.000                 |
| French Guiana                    | 680.96                                                            | 498.86                                                          | 0.13                                                               | 0.37                                                             | 0.00                                                             | 0.00                                                           | 681.09                                                                         | -21.3                                                 | 0.002                 |
| French Southern Territories      | 0.80                                                              | 1.12                                                            | 0.00                                                               | 0.00                                                             | 0.00                                                             | 0.00                                                           | 0.80                                                                           | -0.1                                                  | 0.000                 |
| Gabon                            | 5,241.24                                                          | 2,177.61                                                        | 266.08                                                             | 240.99                                                           | 0.00                                                             | 0.00                                                           | 5,507.32                                                                       | 36.1                                                  | 0.276                 |
| Gambia                           | 587.30                                                            | 313.13                                                          | 155.00                                                             | 106.71                                                           | 0.11                                                             | 0.47                                                           | 742.40                                                                         | -20.4                                                 | 0.000                 |
| Georgia                          | 30.79                                                             | 9.18                                                            | 0.11                                                               | 0.25                                                             | 0.00                                                             | 0.00                                                           | 30.90                                                                          | -0.3                                                  | 0.055                 |
| Germany                          | 890.81                                                            | 315.98                                                          | 11.77                                                              | 11.21                                                            | 3.42                                                             | 4.89                                                           | 906.00                                                                         | -11.9                                                 | 0.008                 |
| Ghana                            | 6,059.31                                                          | 2,845.48                                                        | 396.23                                                             | 216.14                                                           | 0.00                                                             | 0.00                                                           | 6,455.54                                                                       | -108.3                                                | 0.009                 |
| Greece                           | 430.03                                                            | 334.76                                                          | 1.09                                                               | 4.80                                                             | 0.00                                                             | 0.00                                                           | 431.11                                                                         | -11.6                                                 | 0.013                 |
| Grenada                          | 13.57                                                             | 15.78                                                           | 0.00                                                               | 0.00                                                             | 0.00                                                             | 0.00                                                           | 13.57                                                                          | -0.2                                                  | 0.407                 |
| Guadeloupe                       | 19.76                                                             | 23.73                                                           | 0.00                                                               | 0.00                                                             | 0.00                                                             | 0.00                                                           | 19.76                                                                          | 0.6                                                   | 0.053                 |

| Country       | Mean, EC <sub>e</sub> 4 - 8 dS m <sup>-1</sup> (km <sup>2</sup> ) | SD, EC <sub>e</sub> 4 - 8 dS m <sup>-1</sup> (km <sup>2</sup> ) | Mean, EC <sub>e</sub> 8 - 16 dS m <sup>-1</sup> (km <sup>2</sup> ) | SD, EC <sub>e</sub> 8 - 16 dS m <sup>-1</sup> (km <sup>2</sup> ) | Mean, EC <sub>e</sub> ≥ 16 dS m <sup>-1</sup> (km <sup>2</sup> ) | SD, EC <sub>e</sub> ≥ 16 dS m <sup>-1</sup> (km <sup>2</sup> ) | Mean of saline area, EC <sub>e</sub> ≥ 4 dS m <sup>-1</sup> (km <sup>2</sup> ) | 1980 - 2018 trend (km <sup>2</sup> yr <sup>-1</sup> ) | p-value (1980 - 2018) |
|---------------|-------------------------------------------------------------------|-----------------------------------------------------------------|--------------------------------------------------------------------|------------------------------------------------------------------|------------------------------------------------------------------|----------------------------------------------------------------|--------------------------------------------------------------------------------|-------------------------------------------------------|-----------------------|
| Guatemala     | 112.41                                                            | 74.59                                                           | 0.00                                                               | 0.00                                                             | 0.00                                                             | 0.00                                                           | 112.41                                                                         | 0.4                                                   | 0.685                 |
| Guernsey      | 0.01                                                              | 0.09                                                            | 0.00                                                               | 0.00                                                             | 0.00                                                             | 0.00                                                           | 0.01                                                                           | 0.0                                                   | 0.663                 |
| Guinea        | 380.50                                                            | 612.68                                                          | 33.03                                                              | 30.89                                                            | 0.04                                                             | 0.27                                                           | 413.57                                                                         | -23.7                                                 | 0.007                 |
| Guinea-Bissau | 215.10                                                            | 244.88                                                          | 147.49                                                             | 93.06                                                            | 0.32                                                             | 1.41                                                           | 362.91                                                                         | -15.2                                                 | 0.001                 |
| Guyana        | 17,005.91                                                         | 9,664.04                                                        | 135.84                                                             | 123.17                                                           | 0.00                                                             | 0.00                                                           | 17,141.75                                                                      | -254.2                                                | 0.066                 |
| Haiti         | 350.79                                                            | 342.50                                                          | 0.14                                                               | 0.49                                                             | 0.00                                                             | 0.00                                                           | 350.94                                                                         | 1.5                                                   | 0.760                 |
| Honduras      | 542.92                                                            | 424.89                                                          | 1.33                                                               | 2.62                                                             | 0.00                                                             | 0.00                                                           | 544.25                                                                         | -21.6                                                 | 0.000                 |
| Hong Kong     | 95.34                                                             | 36.37                                                           | 0.00                                                               | 0.00                                                             | 0.00                                                             | 0.00                                                           | 95.34                                                                          | -1.7                                                  | 0.000                 |
| Hungary       | 666.81                                                            | 365.46                                                          | 10.57                                                              | 28.52                                                            | 0.33                                                             | 0.85                                                           | 677.71                                                                         | 4.8                                                   | 0.372                 |
| India         | 72,207.91                                                         | 19,327.21                                                       | 13,864.71                                                          | 4,961.64                                                         | 1,421.86                                                         | 2,452.09                                                       | 87,494.48                                                                      | -223.9                                                | 0.523                 |
| Indonesia     | 78,193.87                                                         | 24,840.74                                                       | 104.67                                                             | 290.06                                                           | 6.45                                                             | 23.76                                                          | 78,304.99                                                                      | -122.6                                                | 0.734                 |
| Iran          | 558,214.60                                                        | 65,832.39                                                       | 137,230.30                                                         | 23,629.17                                                        | 20,921.61                                                        | 13,633.69                                                      | 716,366.51                                                                     | -5,737.4                                              | 0.000                 |
| Iraq          | 128,021.00                                                        | 20,191.40                                                       | 91,339.31                                                          | 13,348.61                                                        | 19,408.21                                                        | 8,040.06                                                       | 238,768.53                                                                     | -1,251.4                                              | 0.000                 |
| Ireland       | 86.00                                                             | 36.68                                                           | 1.63                                                               | 2.26                                                             | 0.00                                                             | 0.00                                                           | 87.63                                                                          | 0.9                                                   | 0.117                 |
| Isle of Man   | 0.75                                                              | 1.20                                                            | 0.00                                                               | 0.00                                                             | 0.00                                                             | 0.00                                                           | 0.75                                                                           | 0.0                                                   | 0.016                 |
| Israel        | 2,369.85                                                          | 449.58                                                          | 1,120.20                                                           | 462.79                                                           | 1,143.75                                                         | 233.29                                                         | 4,633.80                                                                       | -47.6                                                 | 0.000                 |
| Italy         | 821.51                                                            | 568.46                                                          | 3.82                                                               | 3.56                                                             | 0.00                                                             | 0.00                                                           | 825.33                                                                         | -19.4                                                 | 0.015                 |
| Jamaica       | 195.48                                                            | 163.23                                                          | 0.04                                                               | 0.18                                                             | 0.00                                                             | 0.00                                                           | 195.52                                                                         | 5.3                                                   | 0.020                 |
| Japan         | 3,580.48                                                          | 438.55                                                          | 24.68                                                              | 14.80                                                            | 0.02                                                             | 0.12                                                           | 3,605.18                                                                       | -6.6                                                  | 0.300                 |
| Jordan        | 29,663.91                                                         | 3,676.89                                                        | 10,346.28                                                          | 1,883.93                                                         | 2,191.31                                                         | 1,140.57                                                       | 42,201.50                                                                      | -169.5                                                | 0.022                 |
| Kazakhstan    | 349,786.28                                                        | 50,861.68                                                       | 26,930.67                                                          | 8,931.20                                                         | 823.56                                                           | 694.18                                                         | 377,540.51                                                                     | -1,839.6                                              | 0.006                 |
| Kenya         | 30,922.65                                                         | 6,254.87                                                        | 25,159.21                                                          | 4,200.75                                                         | 30.43                                                            | 130.54                                                         | 56,112.28                                                                      | -480.6                                                | 0.000                 |
| Kosovo        | 0.36                                                              | 0.71                                                            | 0.00                                                               | 0.00                                                             | 0.00                                                             | 0.00                                                           | 0.36                                                                           | 0.0                                                   | 0.016                 |
| Kuwait        | 8,501.79                                                          | 2,302.16                                                        | 4,793.23                                                           | 1,727.05                                                         | 1,273.16                                                         | 734.82                                                         | 14,568.18                                                                      | -36.4                                                 | 0.003                 |
| Kyrgyzstan    | 1,773.83                                                          | 418.22                                                          | 17.35                                                              | 22.82                                                            | 1.68                                                             | 3.62                                                           | 1,792.86                                                                       | -18.5                                                 | 0.001                 |
| Laos          | 3,243.74                                                          | 1,990.73                                                        | 95.94                                                              | 113.16                                                           | 0.00                                                             | 0.00                                                           | 3,339.68                                                                       | -10.2                                                 | 0.735                 |
| Latvia        | 460.55                                                            | 135.03                                                          | 0.47                                                               | 1.62                                                             | 0.02                                                             | 0.11                                                           | 461.05                                                                         | -7.5                                                  | 0.000                 |
| Lebanon       | 36.89                                                             | 40.37                                                           | 1.20                                                               | 2.96                                                             | 0.00                                                             | 0.00                                                           | 38.09                                                                          | -2.3                                                  | 0.000                 |
| Lesotho       | 5.68                                                              | 7.86                                                            | 0.00                                                               | 0.00                                                             | 0.00                                                             | 0.00                                                           | 5.68                                                                           | -0.2                                                  | 0.076                 |
| Liberia       | 1,633.51                                                          | 2,087.26                                                        | 391.28                                                             | 219.63                                                           | 0.15                                                             | 0.51                                                           | 2,024.95                                                                       | -122.4                                                | 0.000                 |
| Libya         | 158,962.14                                                        | 39,878.72                                                       | 58,823.00                                                          | 14,616.99                                                        | 13,503.88                                                        | 2,064.65                                                       | 231,289.02                                                                     | -715.1                                                | 0.240                 |
| Liechtenstein | 0.32                                                              | 0.32                                                            | 0.00                                                               | 0.00                                                             | 0.00                                                             | 0.00                                                           | 0.32                                                                           | 0.0                                                   | 0.000                 |
| Lithuania     | 56.15                                                             | 52.85                                                           | 0.20                                                               | 0.43                                                             | 0.01                                                             | 0.08                                                           | 56.36                                                                          | -3.0                                                  | 0.000                 |
| Macao         | 2.01                                                              | 1.44                                                            | 0.00                                                               | 0.00                                                             | 0.00                                                             | 0.00                                                           | 2.01                                                                           | -0.1                                                  | 0.000                 |
| Macedonia     | 9.35                                                              | 10.31                                                           | 0.00                                                               | 0.00                                                             | 0.00                                                             | 0.00                                                           | 9.35                                                                           | 0.2                                                   | 0.262                 |
| Madagascar    | 6,005.63                                                          | 3,270.22                                                        | 55.71                                                              | 72.74                                                            | 1.75                                                             | 10.55                                                          | 6,063.10                                                                       | -213.1                                                | 0.000                 |
| Malawi        | 1,029.32                                                          | 1,545.31                                                        | 0.02                                                               | 0.13                                                             | 0.00                                                             | 0.00                                                           | 1,029.34                                                                       | -28.8                                                 | 0.195                 |
| Malaysia      | 37,842.00                                                         | 11,262.18                                                       | 23.94                                                              | 85.35                                                            | 0.00                                                             | 0.00                                                           | 37,865.95                                                                      | 439.7                                                 | 0.005                 |
| Mali          | 112,299.91                                                        | 22,409.65                                                       | 51,336.56                                                          | 8,803.16                                                         | 8,481.53                                                         | 4,653.01                                                       | 172,118.00                                                                     | -79.3                                                 | 0.844                 |
| Malta         | 0.07                                                              | 0.27                                                            | 0.00                                                               | 0.00                                                             | 0.00                                                             | 0.00                                                           | 0.07                                                                           | 0.0                                                   | 0.112                 |

| Country                   | Mean, EC <sub>e</sub> 4 - 8 dS m <sup>-1</sup> (km <sup>2</sup> ) | SD, EC <sub>e</sub> 4 - 8 dS m <sup>-1</sup> (km <sup>2</sup> ) | Mean, EC <sub>e</sub> 8 - 16 dS m <sup>-1</sup> (km <sup>2</sup> ) | SD, EC <sub>e</sub> 8 - 16 dS m <sup>-1</sup> (km <sup>2</sup> ) | Mean, EC <sub>e</sub> ≥ 16 dS m <sup>-1</sup> (km <sup>2</sup> ) | SD, EC <sub>e</sub> ≥ 16 dS m <sup>-1</sup> (km <sup>2</sup> ) | Mean of saline area, EC <sub>e</sub> ≥ 4 dS m <sup>-1</sup> (km <sup>2</sup> ) | 1980 - 2018 trend (km <sup>2</sup> yr <sup>-1</sup> ) | p-value (1980 - 2018) |
|---------------------------|-------------------------------------------------------------------|-----------------------------------------------------------------|--------------------------------------------------------------------|------------------------------------------------------------------|------------------------------------------------------------------|----------------------------------------------------------------|--------------------------------------------------------------------------------|-------------------------------------------------------|-----------------------|
| Martinique                | 5.90                                                              | 6.41                                                            | 0.00                                                               | 0.00                                                             | 0.00                                                             | 0.00                                                           | 5.90                                                                           | 0.0                                                   | 0.706                 |
| Mauritania                | 163,944.59                                                        | 28,457.22                                                       | 75,209.51                                                          | 14,302.27                                                        | 16,467.33                                                        | 6,110.87                                                       | 255,621.43                                                                     | -48.8                                                 | 0.926                 |
| Mexico                    | 43,247.71                                                         | 19,897.31                                                       | 7,243.72                                                           | 2,246.88                                                         | 643.36                                                           | 718.73                                                         | 51,134.79                                                                      | -1,074.5                                              | 0.000                 |
| Moldova                   | 3.93                                                              | 6.04                                                            | 0.00                                                               | 0.00                                                             | 0.00                                                             | 0.00                                                           | 3.93                                                                           | -0.3                                                  | 0.002                 |
| Monaco                    | 0.05                                                              | 0.17                                                            | 0.00                                                               | 0.00                                                             | 0.00                                                             | 0.00                                                           | 0.05                                                                           | 0.0                                                   | 0.029                 |
| Mongolia                  | 202,353.51                                                        | 14,219.52                                                       | 38,371.14                                                          | 8,013.43                                                         | 5,914.46                                                         | 1,499.60                                                       | 246,639.11                                                                     | -578.6                                                | 0.000                 |
| Montenegro                | 7.22                                                              | 5.58                                                            | 0.00                                                               | 0.00                                                             | 0.00                                                             | 0.00                                                           | 7.22                                                                           | -0.2                                                  | 0.006                 |
| Montserrat                | 0.84                                                              | 1.09                                                            | 0.06                                                               | 0.39                                                             | 0.00                                                             | 0.00                                                           | 0.90                                                                           | 0.0                                                   | 0.412                 |
| Morocco                   | 71,746.82                                                         | 27,576.81                                                       | 12,301.31                                                          | 4,820.45                                                         | 1,160.62                                                         | 1,377.16                                                       | 85,208.75                                                                      | 432.8                                                 | 0.335                 |
| Mozambique                | 3,525.23                                                          | 1,773.31                                                        | 12.23                                                              | 11.46                                                            | 0.00                                                             | 0.00                                                           | 3,537.46                                                                       | -121.0                                                | 0.000                 |
| Myanmar                   | 31,952.33                                                         | 11,258.24                                                       | 2,548.16                                                           | 974.57                                                           | 8.53                                                             | 30.34                                                          | 34,509.02                                                                      | 43.7                                                  | 0.798                 |
| Namibia                   | 86,060.52                                                         | 28,098.19                                                       | 23,187.76                                                          | 7,270.07                                                         | 4,044.06                                                         | 2,215.62                                                       | 113,292.33                                                                     | 1,483.3                                               | 0.002                 |
| Nepal                     | 354.40                                                            | 181.89                                                          | 20.08                                                              | 16.05                                                            | 2.00                                                             | 2.83                                                           | 376.49                                                                         | -4.3                                                  | 0.101                 |
| Netherlands               | 2,356.79                                                          | 818.58                                                          | 18.23                                                              | 30.63                                                            | 4.55                                                             | 12.25                                                          | 2,379.57                                                                       | 11.7                                                  | 0.327                 |
| New Caledonia             | 981.37                                                            | 581.43                                                          | 0.61                                                               | 3.55                                                             | 0.10                                                             | 0.63                                                           | 982.08                                                                         | 15.1                                                  | 0.068                 |
| New Zealand               | 93.79                                                             | 138.33                                                          | 1.05                                                               | 3.39                                                             | 0.00                                                             | 0.00                                                           | 94.83                                                                          | -4.7                                                  | 0.018                 |
| Nicaragua                 | 1,154.48                                                          | 912.61                                                          | 2.15                                                               | 4.67                                                             | 0.00                                                             | 0.00                                                           | 1,156.63                                                                       | -29.3                                                 | 0.022                 |
| Niger                     | 195,201.72                                                        | 32,047.93                                                       | 78,157.78                                                          | 14,247.23                                                        | 26,030.46                                                        | 5,701.82                                                       | 299,389.96                                                                     | 760.3                                                 | 0.126                 |
| Nigeria                   | 28,880.82                                                         | 10,999.63                                                       | 12,696.09                                                          | 4,619.99                                                         | 696.20                                                           | 636.48                                                         | 42,273.10                                                                      | -777.5                                                | 0.000                 |
| North Korea               | 2,152.15                                                          | 618.72                                                          | 1.39                                                               | 1.70                                                             | 0.00                                                             | 0.00                                                           | 2,153.54                                                                       | -47.8                                                 | 0.000                 |
| Northern Cyprus           | 7.63                                                              | 6.97                                                            | 0.00                                                               | 0.00                                                             | 0.00                                                             | 0.00                                                           | 7.63                                                                           | -0.2                                                  | 0.060                 |
| Norway                    | 2.92                                                              | 5.43                                                            | 0.66                                                               | 2.11                                                             | 0.04                                                             | 0.12                                                           | 3.61                                                                           | -0.4                                                  | 0.000                 |
| Oman                      | 51,408.83                                                         | 12,282.33                                                       | 34,412.65                                                          | 5,980.26                                                         | 5,907.46                                                         | 4,882.27                                                       | 91,728.94                                                                      | -567.0                                                | 0.014                 |
| Pakistan                  | 191,486.76                                                        | 28,171.70                                                       | 48,332.79                                                          | 8,503.59                                                         | 4,425.30                                                         | 4,761.69                                                       | 244,244.85                                                                     | -1,584.6                                              | 0.000                 |
| Palestine                 | 765.01                                                            | 163.43                                                          | 267.32                                                             | 142.09                                                           | 53.27                                                            | 64.44                                                          | 1,085.61                                                                       | -6.7                                                  | 0.000                 |
| Panama                    | 1,513.66                                                          | 1,042.17                                                        | 7.63                                                               | 27.12                                                            | 0.07                                                             | 0.41                                                           | 1,521.36                                                                       | 34.3                                                  | 0.019                 |
| Papua New Guinea          | 22,279.96                                                         | 13,841.84                                                       | 738.59                                                             | 779.22                                                           | 1.59                                                             | 6.37                                                           | 23,020.14                                                                      | 867.8                                                 | 0.000                 |
| Paraguay                  | 9,012.33                                                          | 7,101.04                                                        | 0.06                                                               | 0.38                                                             | 0.00                                                             | 0.00                                                           | 9,012.39                                                                       | 91.5                                                  | 0.372                 |
| Peru                      | 119,258.89                                                        | 70,082.12                                                       | 8,003.55                                                           | 1,448.13                                                         | 795.30                                                           | 342.29                                                         | 128,057.74                                                                     | 2,308.3                                               | 0.019                 |
| Philippines               | 33,395.51                                                         | 17,119.77                                                       | 788.86                                                             | 629.98                                                           | 0.11                                                             | 0.68                                                           | 34,184.47                                                                      | 1,240.9                                               | 0.000                 |
| Poland                    | 185.60                                                            | 65.94                                                           | 5.19                                                               | 3.62                                                             | 1.60                                                             | 1.61                                                           | 192.38                                                                         | 1.0                                                   | 0.315                 |
| Portugal                  | 231.80                                                            | 164.74                                                          | 7.51                                                               | 5.05                                                             | 2.66                                                             | 1.03                                                           | 241.98                                                                         | 5.5                                                   | 0.017                 |
| Puerto Rico               | 153.97                                                            | 144.64                                                          | 0.46                                                               | 1.16                                                             | 0.00                                                             | 0.00                                                           | 154.43                                                                         | 7.6                                                   | 0.000                 |
| Qatar                     | 4,242.01                                                          | 2,183.97                                                        | 4,552.07                                                           | 1,650.50                                                         | 1,183.34                                                         | 721.18                                                         | 9,977.42                                                                       | 17.7                                                  | 0.042                 |
| Republic of Congo         | 18,533.10                                                         | 9,311.56                                                        | 0.68                                                               | 2.49                                                             | 0.02                                                             | 0.14                                                           | 18,533.80                                                                      | -142.5                                                | 0.288                 |
| Romania                   | 295.05                                                            | 279.33                                                          | 0.05                                                               | 0.16                                                             | 0.00                                                             | 0.00                                                           | 295.10                                                                         | -4.5                                                  | 0.268                 |
| Rwanda                    | 19.84                                                             | 16.50                                                           | 0.00                                                               | 0.00                                                             | 0.04                                                             | 0.27                                                           | 19.88                                                                          | -0.2                                                  | 0.499                 |
| Saint Kitts and Nevis     | 5.20                                                              | 5.80                                                            | 0.00                                                               | 0.00                                                             | 0.00                                                             | 0.00                                                           | 5.20                                                                           | -0.1                                                  | 0.506                 |
| Saint Lucia               | 6.62                                                              | 7.86                                                            | 0.00                                                               | 0.00                                                             | 0.00                                                             | 0.00                                                           | 6.62                                                                           | 0.1                                                   | 0.208                 |
| Saint Pierre and Miquelon | 0.80                                                              | 1.14                                                            | 0.00                                                               | 0.00                                                             | 0.00                                                             | 0.00                                                           | 0.80                                                                           | -0.1                                                  | 0.000                 |

| Country                          | Mean, EC <sub>e</sub> 4 - 8 dS m <sup>-1</sup> (km <sup>2</sup> ) | SD, EC <sub>e</sub> 4 - 8 dS m <sup>-1</sup> (km <sup>2</sup> ) | Mean, EC <sub>e</sub> 8 - 16 dS m <sup>-1</sup> (km <sup>2</sup> ) | SD, EC <sub>e</sub> 8 - 16 dS m <sup>-1</sup> (km <sup>2</sup> ) | Mean, EC <sub>e</sub> ≥ 16 dS m <sup>-1</sup> (km <sup>2</sup> ) | SD, EC <sub>e</sub> ≥ 16 dS m <sup>-1</sup> (km <sup>2</sup> ) | Mean of saline area, EC <sub>e</sub> ≥ 4 dS m <sup>-1</sup> (km <sup>2</sup> ) | 1980 - 2018 trend (km <sup>2</sup> yr <sup>-1</sup> ) | p-value (1980 - 2018) |
|----------------------------------|-------------------------------------------------------------------|-----------------------------------------------------------------|--------------------------------------------------------------------|------------------------------------------------------------------|------------------------------------------------------------------|----------------------------------------------------------------|--------------------------------------------------------------------------------|-------------------------------------------------------|-----------------------|
| Saint Vincent and the Grenadines | 8.13                                                              | 7.55                                                            | 0.00                                                               | 0.00                                                             | 0.00                                                             | 0.00                                                           | 8.13                                                                           | -0.3                                                  | 0.017                 |
| Saint-Barthélemy                 | 0.02                                                              | 0.13                                                            | 0.00                                                               | 0.00                                                             | 0.00                                                             | 0.00                                                           | 0.02                                                                           | 0.0                                                   | 0.253                 |
| Saint-Martin                     | 0.44                                                              | 1.09                                                            | 0.00                                                               | 0.00                                                             | 0.00                                                             | 0.00                                                           | 0.44                                                                           | 0.0                                                   | 0.754                 |
| Saudi Arabia                     | 380,561.24                                                        | 61,027.91                                                       | 165,425.49                                                         | 26,109.18                                                        | 39,163.39                                                        | 13,433.20                                                      | 585,150.12                                                                     | -4,399.9                                              | 0.000                 |
| Senegal                          | 6,224.53                                                          | 3,488.72                                                        | 6,415.38                                                           | 2,941.95                                                         | 409.72                                                           | 294.48                                                         | 13,049.63                                                                      | -469.5                                                | 0.000                 |
| Serbia                           | 78.21                                                             | 71.30                                                           | 0.00                                                               | 0.00                                                             | 0.00                                                             | 0.00                                                           | 78.21                                                                          | -0.2                                                  | 0.865                 |
| Sierra Leone                     | 2,535.22                                                          | 4,025.45                                                        | 462.75                                                             | 456.58                                                           | 1.15                                                             | 2.79                                                           | 2,999.13                                                                       | -176.6                                                | 0.002                 |
| Singapore                        | 33.26                                                             | 10.74                                                           | 0.42                                                               | 1.78                                                             | 0.00                                                             | 0.00                                                           | 33.68                                                                          | -0.3                                                  | 0.124                 |
| Sint Maarten                     | 0.08                                                              | 0.41                                                            | 0.00                                                               | 0.00                                                             | 0.00                                                             | 0.00                                                           | 0.08                                                                           | 0.0                                                   | 0.357                 |
| Slovakia                         | 8.08                                                              | 8.85                                                            | 0.04                                                               | 0.15                                                             | 0.00                                                             | 0.00                                                           | 8.13                                                                           | -0.2                                                  | 0.172                 |
| Slovenia                         | 35.91                                                             | 13.06                                                           | 0.12                                                               | 0.67                                                             | 0.00                                                             | 0.00                                                           | 36.03                                                                          | -0.1                                                  | 0.463                 |
| Solomon Islands                  | 835.19                                                            | 286.87                                                          | 0.02                                                               | 0.14                                                             | 0.00                                                             | 0.00                                                           | 835.21                                                                         | 13.0                                                  | 0.001                 |
| Somalia                          | 86,377.38                                                         | 12,393.26                                                       | 75,367.30                                                          | 9,215.17                                                         | 3,182.40                                                         | 2,002.27                                                       | 164,927.08                                                                     | -699.3                                                | 0.010                 |
| South Africa                     | 32,483.59                                                         | 5,964.61                                                        | 4,372.70                                                           | 3,372.51                                                         | 1,095.75                                                         | 1,912.33                                                       | 37,952.03                                                                      | 10.5                                                  | 0.934                 |
| South Korea                      | 923.40                                                            | 309.35                                                          | 25.90                                                              | 13.13                                                            | 0.00                                                             | 0.00                                                           | 949.30                                                                         | -14.6                                                 | 0.001                 |
| South Sudan                      | 617.63                                                            | 529.26                                                          | 18.45                                                              | 20.09                                                            | 0.00                                                             | 0.00                                                           | 636.09                                                                         | -20.7                                                 | 0.005                 |
| Spain                            | 446.57                                                            | 254.09                                                          | 0.60                                                               | 1.68                                                             | 0.00                                                             | 0.00                                                           | 447.17                                                                         | -11.7                                                 | 0.001                 |
| Sri Lanka                        | 360.67                                                            | 134.20                                                          | 3.36                                                               | 3.00                                                             | 0.00                                                             | 0.00                                                           | 364.03                                                                         | -0.9                                                  | 0.638                 |
| Sudan                            | 170,056.91                                                        | 35,272.55                                                       | 55,918.49                                                          | 12,620.13                                                        | 10,552.34                                                        | 5,361.61                                                       | 236,527.74                                                                     | 2,294.6                                               | 0.000                 |
| Suriname                         | 3,271.49                                                          | 2,497.50                                                        | 0.04                                                               | 0.27                                                             | 0.00                                                             | 0.00                                                           | 3,271.53                                                                       | -30.7                                                 | 0.395                 |
| Swaziland                        | 25.71                                                             | 79.05                                                           | 0.00                                                               | 0.00                                                             | 0.00                                                             | 0.00                                                           | 25.71                                                                          | -0.4                                                  | 0.725                 |
| Sweden                           | 129.77                                                            | 99.05                                                           | 0.08                                                               | 0.46                                                             | 0.00                                                             | 0.00                                                           | 129.85                                                                         | -6.3                                                  | 0.000                 |
| Switzerland                      | 30.68                                                             | 20.57                                                           | 0.02                                                               | 0.09                                                             | 0.00                                                             | 0.00                                                           | 30.69                                                                          | -1.4                                                  | 0.000                 |
| Syria                            | 51,002.45                                                         | 7,452.21                                                        | 22,859.12                                                          | 6,685.03                                                         | 7,326.31                                                         | 3,134.39                                                       | 81,187.89                                                                      | -41.0                                                 | 0.650                 |
| São Tomé and Príncipe            | 0.39                                                              | 0.43                                                            | 0.00                                                               | 0.00                                                             | 0.00                                                             | 0.00                                                           | 0.39                                                                           | 0.0                                                   | 0.001                 |
| Taiwan                           | 533.85                                                            | 104.96                                                          | 5.75                                                               | 31.57                                                            | 0.10                                                             | 0.63                                                           | 539.70                                                                         | -4.3                                                  | 0.017                 |
| Tajikistan                       | 3,528.58                                                          | 585.37                                                          | 582.93                                                             | 378.42                                                           | 102.44                                                           | 72.82                                                          | 4,213.95                                                                       | -10.5                                                 | 0.307                 |
| Tanzania                         | 3,855.78                                                          | 2,684.81                                                        | 20.11                                                              | 25.25                                                            | 0.00                                                             | 0.00                                                           | 3,875.89                                                                       | -185.2                                                | 0.000                 |
| Thailand                         | 34,780.67                                                         | 15,173.31                                                       | 13,378.82                                                          | 7,584.43                                                         | 19.34                                                            | 29.44                                                          | 48,178.82                                                                      | 740.3                                                 | 0.011                 |
| Timor-Leste                      | 41.90                                                             | 38.71                                                           | 0.00                                                               | 0.00                                                             | 0.00                                                             | 0.00                                                           | 41.90                                                                          | -1.3                                                  | 0.020                 |
| Togo                             | 256.81                                                            | 279.55                                                          | 3.58                                                               | 3.57                                                             | 0.00                                                             | 0.00                                                           | 260.39                                                                         | -13.8                                                 | 0.000                 |
| Trinidad and Tobago              | 292.52                                                            | 227.76                                                          | 0.00                                                               | 0.00                                                             | 0.00                                                             | 0.00                                                           | 292.52                                                                         | 1.9                                                   | 0.563                 |
| Tunisia                          | 19,615.14                                                         | 6,112.50                                                        | 6,301.58                                                           | 1,868.58                                                         | 2,356.56                                                         | 662.74                                                         | 28,273.27                                                                      | -274.8                                                | 0.015                 |
| Turkey                           | 8,835.55                                                          | 3,206.00                                                        | 1,223.61                                                           | 721.65                                                           | 16.34                                                            | 19.84                                                          | 10,075.50                                                                      | -278.4                                                | 0.000                 |
| Turkmenistan                     | 144,587.05                                                        | 20,064.07                                                       | 50,617.06                                                          | 14,590.47                                                        | 3,111.81                                                         | 2,263.98                                                       | 198,315.93                                                                     | -444.9                                                | 0.259                 |
| Turks and Caicos Islands         | 217.51                                                            | 84.17                                                           | 64.86                                                              | 75.75                                                            | 2.77                                                             | 5.34                                                           | 285.14                                                                         | -2.6                                                  | 0.016                 |
| Uganda                           | 138.05                                                            | 184.25                                                          | 0.00                                                               | 0.00                                                             | 0.00                                                             | 0.00                                                           | 138.05                                                                         | -8.8                                                  | 0.000                 |
| Ukraine                          | 427.25                                                            | 137.60                                                          | 0.21                                                               | 0.36                                                             | 0.00                                                             | 0.00                                                           | 427.46                                                                         | -0.8                                                  | 0.676                 |
| United Arab Emirates             | 16,964.19                                                         | 4,013.65                                                        | 6,615.55                                                           | 2,957.21                                                         | 1,708.59                                                         | 1,222.72                                                       | 25,288.32                                                                      | -115.7                                                | 0.042                 |
| United States                    | 160,671.09                                                        | 23,163.32                                                       | 24,495.28                                                          | 5,692.75                                                         | 3,700.50                                                         | 1,180.61                                                       | 188,866.87                                                                     | -1,225.3                                              | 0.001                 |

| Country                              | Mean, EC <sub>e</sub> 4 - 8 dS m <sup>-1</sup> (km <sup>2</sup> ) | SD, EC <sub>e</sub> 4 - 8 dS m <sup>-1</sup> (km <sup>2</sup> ) | Mean, EC <sub>e</sub> 8 - 16 dS m <sup>-1</sup> (km <sup>2</sup> ) | SD, EC <sub>e</sub> 8 - 16 dS m <sup>-1</sup> (km <sup>2</sup> ) | Mean, EC <sub>e</sub> ≥ 16 dS m <sup>-1</sup> (km <sup>2</sup> ) | SD, EC <sub>e</sub> ≥ 16 dS m <sup>-1</sup> (km <sup>2</sup> ) | Mean of saline area, EC <sub>e</sub> ≥ 4 dS m <sup>-1</sup> (km <sup>2</sup> ) | 1980 - 2018 trend (km <sup>2</sup> yr <sup>-1</sup> ) | p-value (1980 - 2018) |
|--------------------------------------|-------------------------------------------------------------------|-----------------------------------------------------------------|--------------------------------------------------------------------|------------------------------------------------------------------|------------------------------------------------------------------|----------------------------------------------------------------|--------------------------------------------------------------------------------|-------------------------------------------------------|-----------------------|
| United States Minor Outlying Islands | 1.10                                                              | 1.51                                                            | 0.00                                                               | 0.00                                                             | 0.00                                                             | 0.00                                                           | 1.10                                                                           | -0.1                                                  | 0.000                 |
| Uruguay                              | 1,402.25                                                          | 511.01                                                          | 40.78                                                              | 38.85                                                            | 0.00                                                             | 0.00                                                           | 1,443.03                                                                       | -28.5                                                 | 0.000                 |
| Uzbekistan                           | 105,515.20                                                        | 23,702.97                                                       | 27,064.20                                                          | 11,276.84                                                        | 1,389.98                                                         | 1,094.17                                                       | 133,969.37                                                                     | -684.4                                                | 0.136                 |
| Vanuatu                              | 271.67                                                            | 217.21                                                          | 0.00                                                               | 0.00                                                             | 0.00                                                             | 0.00                                                           | 271.67                                                                         | -2.9                                                  | 0.352                 |
| Venezuela                            | 28,784.86                                                         | 16,664.07                                                       | 255.02                                                             | 149.36                                                           | 2.75                                                             | 14.50                                                          | 29,042.64                                                                      | -96.0                                                 | 0.692                 |
| Vietnam                              | 10,792.66                                                         | 3,732.20                                                        | 126.89                                                             | 123.82                                                           | 0.00                                                             | 0.00                                                           | 10,919.54                                                                      | -11.7                                                 | 0.832                 |
| Virgin Islands, U.S.                 | 6.67                                                              | 9.84                                                            | 0.00                                                               | 0.00                                                             | 0.00                                                             | 0.00                                                           | 6.67                                                                           | 0.2                                                   | 0.127                 |
| Western Sahara                       | 102,941.68                                                        | 18,916.15                                                       | 41,349.66                                                          | 11,398.44                                                        | 11,078.28                                                        | 4,953.38                                                       | 155,369.61                                                                     | 649.8                                                 | 0.022                 |
| Yemen                                | 52,529.11                                                         | 17,254.51                                                       | 32,682.20                                                          | 11,926.33                                                        | 1,681.85                                                         | 2,772.69                                                       | 86,893.16                                                                      | -1,878.2                                              | 0.000                 |
| Zambia                               | 1,347.27                                                          | 1,686.24                                                        | 16.63                                                              | 22.64                                                            | 0.00                                                             | 0.00                                                           | 1,363.90                                                                       | -58.0                                                 | 0.014                 |
| Zimbabwe                             | 2,490.70                                                          | 2,749.74                                                        | 4.24                                                               | 6.18                                                             | 0.12                                                             | 0.76                                                           | 2,495.06                                                                       | -107.5                                                | 0.004                 |
| Åland                                | 0.01                                                              | 0.07                                                            | 0.00                                                               | 0.00                                                             | 0.00                                                             | 0.00                                                           | 0.01                                                                           | 0.0                                                   | 0.092                 |



**Table S23: Statistics on the total area of soils with an ESP between certain thresholds in the 1980 - 2018 period at the country level.** This table also contains information about the country-level trends in the total area of soils with an ESP  $\geq$  6% since 1980 and the corresponding statistical significance (each class includes its left class edge).

| Country                          | Mean, ESP 6 - 15% (km <sup>2</sup> ) | SD, ESP 6 - 15% (km <sup>2</sup> ) | Mean, ESP 15 - 30% (km <sup>2</sup> ) | SD, ESP 15 - 30% (km <sup>2</sup> ) | Mean, ESP $\geq$ 30% (km <sup>2</sup> ) | SD, ESP $\geq$ 30% (km <sup>2</sup> ) | Mean of sodic area, ESP $\geq$ 6% (km <sup>2</sup> ) | 1980 - 2018 trend (km <sup>2</sup> yr <sup>-1</sup> ) | p-value (1980 - 2018) |
|----------------------------------|--------------------------------------|------------------------------------|---------------------------------------|-------------------------------------|-----------------------------------------|---------------------------------------|------------------------------------------------------|-------------------------------------------------------|-----------------------|
| Afghanistan                      | 216,750.94                           | 20,860.38                          | 3,014.32                              | 1,254.46                            | 0.02                                    | 0.12                                  | 219,765.28                                           | 1,483.7                                               | 0.000                 |
| Akrotiri and Dhekelia            | 4.50                                 | 6.24                               | 0.00                                  | 0.00                                | 0.00                                    | 0.00                                  | 4.50                                                 | 0.1                                                   | 0.519                 |
| Albania                          | 36.54                                | 28.84                              | 0.12                                  | 0.63                                | 0.00                                    | 0.00                                  | 36.65                                                | -0.4                                                  | 0.355                 |
| Algeria                          | 626,841.62                           | 72,092.34                          | 0.00                                  | 0.00                                | 0.00                                    | 0.00                                  | 626,841.62                                           | 510.1                                                 | 0.625                 |
| Angola                           | 13,647.56                            | 5,882.03                           | 0.02                                  | 0.13                                | 0.00                                    | 0.00                                  | 13,647.58                                            | -276.4                                                | 0.000                 |
| Anguilla                         | 0.67                                 | 2.00                               | 0.00                                  | 0.00                                | 0.00                                    | 0.00                                  | 0.67                                                 | 0.0                                                   | 0.449                 |
| Antigua and Barbuda              | 2.78                                 | 4.39                               | 0.00                                  | 0.00                                | 0.00                                    | 0.00                                  | 2.78                                                 | 0.0                                                   | 0.454                 |
| Argentina                        | 288,013.11                           | 43,405.75                          | 359.46                                | 326.93                              | 0.12                                    | 0.76                                  | 288,372.69                                           | 2,012.4                                               | 0.001                 |
| Armenia                          | 50.06                                | 30.47                              | 0.00                                  | 0.00                                | 0.00                                    | 0.00                                  | 50.06                                                | -1.6                                                  | 0.000                 |
| Aruba                            | 0.21                                 | 0.60                               | 0.00                                  | 0.00                                | 0.00                                    | 0.00                                  | 0.21                                                 | 0.0                                                   | 0.785                 |
| Australia                        | 838,355.96                           | 125,602.81                         | 3,211.83                              | 1,291.58                            | 0.00                                    | 0.00                                  | 841,567.78                                           | -486.2                                                | 0.791                 |
| Austria                          | 1.85                                 | 1.80                               | 0.00                                  | 0.00                                | 0.00                                    | 0.00                                  | 1.85                                                 | -0.1                                                  | 0.000                 |
| Azerbaijan                       | 7,027.13                             | 588.47                             | 0.05                                  | 0.32                                | 0.00                                    | 0.00                                  | 7,027.18                                             | 12.0                                                  | 0.156                 |
| Bahamas                          | 373.98                               | 129.71                             | 0.00                                  | 0.00                                | 0.00                                    | 0.00                                  | 373.98                                               | -0.4                                                  | 0.843                 |
| Bahrain                          | 445.01                               | 4.06                               | 1.68                                  | 4.09                                | 0.00                                    | 0.00                                  | 446.69                                               | 0.0                                                   | 0.002                 |
| Bangladesh                       | 41.33                                | 38.04                              | 0.00                                  | 0.00                                | 0.00                                    | 0.00                                  | 41.33                                                | -1.2                                                  | 0.026                 |
| Barbados                         | 0.30                                 | 1.87                               | 0.00                                  | 0.00                                | 0.00                                    | 0.00                                  | 0.30                                                 | 0.0                                                   | 0.335                 |
| Belize                           | 0.56                                 | 1.12                               | 0.00                                  | 0.00                                | 0.00                                    | 0.00                                  | 0.56                                                 | 0.0                                                   | 0.364                 |
| Benin                            | 1,400.40                             | 2,554.13                           | 0.00                                  | 0.00                                | 0.00                                    | 0.00                                  | 1,400.40                                             | -72.7                                                 | 0.044                 |
| Bhutan                           | 0.08                                 | 0.48                               | 0.00                                  | 0.00                                | 0.00                                    | 0.00                                  | 0.08                                                 | 0.0                                                   | 0.158                 |
| Bolivia                          | 45,532.04                            | 5,034.51                           | 99.96                                 | 121.90                              | 0.00                                    | 0.00                                  | 45,631.99                                            | 196.3                                                 | 0.005                 |
| Bonaire, Sint Eustatius and Saba | 14.47                                | 15.29                              | 0.00                                  | 0.00                                | 0.00                                    | 0.00                                  | 14.47                                                | -0.9                                                  | 0.000                 |
| Botswana                         | 27,785.34                            | 13,305.02                          | 1.17                                  | 4.28                                | 0.02                                    | 0.13                                  | 27,786.53                                            | -110.8                                                | 0.565                 |
| Brazil                           | 5,724.73                             | 5,339.75                           | 0.00                                  | 0.00                                | 0.00                                    | 0.00                                  | 5,724.73                                             | -80.7                                                 | 0.294                 |
| British Virgin Islands           | 0.54                                 | 3.00                               | 0.00                                  | 0.00                                | 0.00                                    | 0.00                                  | 0.54                                                 | 0.0                                                   | 0.249                 |
| Brunei                           | 0.46                                 | 0.64                               | 0.00                                  | 0.00                                | 0.00                                    | 0.00                                  | 0.46                                                 | 0.0                                                   | 0.049                 |
| Bulgaria                         | 4.41                                 | 10.36                              | 0.28                                  | 1.73                                | 0.02                                    | 0.10                                  | 4.70                                                 | 0.0                                                   | 0.932                 |
| Burkina Faso                     | 9,474.89                             | 9,683.42                           | 0.02                                  | 0.13                                | 0.00                                    | 0.00                                  | 9,474.91                                             | -514.0                                                | 0.000                 |
| Burundi                          | 11.18                                | 1.99                               | 3.26                                  | 1.85                                | 0.07                                    | 0.23                                  | 14.51                                                | 0.0                                                   | 0.981                 |
| Cambodia                         | 1,542.09                             | 2,256.18                           | 0.00                                  | 0.00                                | 0.00                                    | 0.00                                  | 1,542.09                                             | -29.6                                                 | 0.364                 |
| Cameroon                         | 576.39                               | 752.65                             | 22.67                                 | 112.58                              | 0.02                                    | 0.13                                  | 599.08                                               | -18.1                                                 | 0.111                 |
| Caspian Sea                      | 302.26                               | 82.10                              | 0.47                                  | 0.39                                | 0.00                                    | 0.00                                  | 302.73                                               | -3.2                                                  | 0.005                 |
| Cayman Islands                   | 14.89                                | 23.84                              | 0.00                                  | 0.00                                | 0.00                                    | 0.00                                  | 14.89                                                | 0.2                                                   | 0.593                 |
| Central African Republic         | 49.56                                | 143.54                             | 0.00                                  | 0.00                                | 0.00                                    | 0.00                                  | 49.56                                                | -0.2                                                  | 0.938                 |
| Chad                             | 50,295.87                            | 8,051.47                           | 0.70                                  | 0.36                                | 0.00                                    | 0.00                                  | 50,296.56                                            | -74.0                                                 | 0.525                 |
| Chile                            | 180,306.30                           | 10,376.65                          | 41.13                                 | 32.93                               | 0.00                                    | 0.00                                  | 180,347.44                                           | 492.8                                                 | 0.000                 |

| Country                          | Mean, ESP 6 - 15% (km <sup>2</sup> ) | SD, ESP 6 - 15% (km <sup>2</sup> ) | Mean, ESP 15 - 30% (km <sup>2</sup> ) | SD, ESP 15 - 30% (km <sup>2</sup> ) | Mean, ESP ≥ 30% (km <sup>2</sup> ) | SD, ESP ≥ 30% (km <sup>2</sup> ) | Mean of sodic area, ESP ≥ 6% (km <sup>2</sup> ) | 1980 - 2018 trend (km <sup>2</sup> yr <sup>-1</sup> ) | p-value (1980 - 2018) |
|----------------------------------|--------------------------------------|------------------------------------|---------------------------------------|-------------------------------------|------------------------------------|----------------------------------|-------------------------------------------------|-------------------------------------------------------|-----------------------|
| China                            | 2,136,070.51                         | 47,271.28                          | 161,035.31                            | 12,608.93                           | 20.50                              | 19.23                            | 2,297,126.32                                    | -715.8                                                | 0.328                 |
| Colombia                         | 704.33                               | 323.74                             | 0.00                                  | 0.00                                | 0.00                               | 0.00                             | 704.33                                          | -17.2                                                 | 0.000                 |
| Costa Rica                       | 2.52                                 | 14.80                              | 0.00                                  | 0.00                                | 0.00                               | 0.00                             | 2.52                                            | -0.1                                                  | 0.668                 |
| Cuba                             | 147.89                               | 85.80                              | 0.06                                  | 0.22                                | 0.00                               | 0.00                             | 147.95                                          | -1.0                                                  | 0.404                 |
| Curaçao                          | 0.96                                 | 1.82                               | 0.00                                  | 0.00                                | 0.00                               | 0.00                             | 0.96                                            | -0.1                                                  | 0.028                 |
| Cyprus                           | 27.43                                | 58.34                              | 0.00                                  | 0.00                                | 0.00                               | 0.00                             | 27.43                                           | 0.3                                                   | 0.713                 |
| Czech Republic                   | 1.02                                 | 4.53                               | 0.00                                  | 0.00                                | 0.00                               | 0.00                             | 1.02                                            | 0.0                                                   | 0.446                 |
| Côte d'Ivoire                    | 302.48                               | 1,376.11                           | 0.00                                  | 0.00                                | 0.00                               | 0.00                             | 302.48                                          | -10.4                                                 | 0.601                 |
| Democratic Republic of the Congo | 100.24                               | 55.10                              | 1.93                                  | 2.36                                | 0.02                               | 0.14                             | 102.19                                          | 0.9                                                   | 0.251                 |
| Djibouti                         | 6,726.63                             | 779.05                             | 0.04                                  | 0.19                                | 0.00                               | 0.00                             | 6,726.67                                        | -45.5                                                 | 0.000                 |
| Dominica                         | 0.02                                 | 0.13                               | 0.00                                  | 0.00                                | 0.00                               | 0.00                             | 0.02                                            | 0.0                                                   | 0.158                 |
| Dominican Republic               | 6.50                                 | 8.18                               | 0.00                                  | 0.00                                | 0.00                               | 0.00                             | 6.50                                            | -0.1                                                  | 0.588                 |
| Ecuador                          | 55.23                                | 37.43                              | 0.00                                  | 0.00                                | 0.00                               | 0.00                             | 55.23                                           | -1.0                                                  | 0.063                 |
| Egypt                            | 52,104.65                            | 5,142.35                           | 86.07                                 | 15.44                               | 0.00                               | 0.00                             | 52,190.72                                       | 288.2                                                 | 0.000                 |
| El Salvador                      | 7.61                                 | 18.94                              | 0.00                                  | 0.00                                | 0.00                               | 0.00                             | 7.61                                            | 0.0                                                   | 0.944                 |
| Eritrea                          | 19,264.50                            | 2,842.37                           | 1.36                                  | 2.02                                | 0.00                               | 0.00                             | 19,265.86                                       | -14.3                                                 | 0.729                 |
| Estonia                          | 77.88                                | 209.58                             | 0.00                                  | 0.00                                | 0.00                               | 0.00                             | 77.88                                           | -1.4                                                  | 0.635                 |
| Ethiopia                         | 24,980.82                            | 5,996.57                           | 0.17                                  | 0.58                                | 0.00                               | 0.00                             | 24,980.99                                       | -179.9                                                | 0.033                 |
| France                           | 37.89                                | 57.41                              | 0.00                                  | 0.00                                | 0.00                               | 0.00                             | 37.89                                           | 3.1                                                   | 0.000                 |
| French Southern Territories      | 0.19                                 | 0.58                               | 0.00                                  | 0.00                                | 0.00                               | 0.00                             | 0.19                                            | 0.0                                                   | 0.155                 |
| Gabon                            | 128.38                               | 213.91                             | 0.00                                  | 0.00                                | 0.00                               | 0.00                             | 128.38                                          | 1.0                                                   | 0.750                 |
| Gambia                           | 79.86                                | 26.17                              | 0.00                                  | 0.00                                | 0.00                               | 0.00                             | 79.86                                           | -0.5                                                  | 0.197                 |
| Georgia                          | 13.02                                | 48.81                              | 0.00                                  | 0.00                                | 0.00                               | 0.00                             | 13.02                                           | -0.4                                                  | 0.560                 |
| Germany                          | 0.77                                 | 3.69                               | 0.00                                  | 0.00                                | 0.00                               | 0.00                             | 0.77                                            | 0.0                                                   | 0.546                 |
| Ghana                            | 3,161.34                             | 3,545.31                           | 0.00                                  | 0.00                                | 0.00                               | 0.00                             | 3,161.34                                        | -113.6                                                | 0.022                 |
| Greece                           | 29.18                                | 26.27                              | 0.00                                  | 0.00                                | 0.00                               | 0.00                             | 29.18                                           | 0.9                                                   | 0.013                 |
| Guadeloupe                       | 0.97                                 | 4.62                               | 0.00                                  | 0.00                                | 0.00                               | 0.00                             | 0.97                                            | 0.0                                                   | 0.779                 |
| Guatemala                        | 35.08                                | 216.47                             | 0.00                                  | 0.00                                | 0.00                               | 0.00                             | 35.08                                           | -1.4                                                  | 0.666                 |
| Guinea                           | 411.49                               | 534.09                             | 0.00                                  | 0.00                                | 0.00                               | 0.00                             | 411.49                                          | -1.0                                                  | 0.895                 |
| Guinea-Bissau                    | 113.08                               | 363.57                             | 0.00                                  | 0.00                                | 0.00                               | 0.00                             | 113.08                                          | -2.4                                                  | 0.647                 |
| Guyana                           | 120.84                               | 142.83                             | 0.00                                  | 0.00                                | 0.00                               | 0.00                             | 120.84                                          | -4.5                                                  | 0.024                 |
| Haiti                            | 16.22                                | 35.49                              | 0.00                                  | 0.00                                | 0.00                               | 0.00                             | 16.22                                           | -0.2                                                  | 0.676                 |
| Honduras                         | 8.65                                 | 26.80                              | 0.00                                  | 0.00                                | 0.00                               | 0.00                             | 8.65                                            | -0.4                                                  | 0.321                 |
| Hungary                          | 385.75                               | 759.49                             | 0.14                                  | 0.75                                | 0.00                               | 0.00                             | 385.89                                          | -32.9                                                 | 0.001                 |
| India                            | 103,978.73                           | 26,904.56                          | 259.27                                | 308.06                              | 0.00                               | 0.00                             | 104,238.00                                      | -558.7                                                | 0.150                 |
| Indonesia                        | 245.14                               | 311.54                             | 0.00                                  | 0.00                                | 0.00                               | 0.00                             | 245.14                                          | 4.1                                                   | 0.362                 |
| Iran                             | 923,430.25                           | 48,133.47                          | 12,786.84                             | 5,039.74                            | 0.00                               | 0.00                             | 936,217.09                                      | 3,499.1                                               | 0.000                 |
| Iraq                             | 311,083.31                           | 9,109.68                           | 2,938.91                              | 1,043.44                            | 0.00                               | 0.00                             | 314,022.22                                      | 258.8                                                 | 0.044                 |
| Ireland                          | 0.47                                 | 1.44                               | 0.00                                  | 0.00                                | 0.00                               | 0.00                             | 0.47                                            | 0.0                                                   | 0.355                 |
| Israel                           | 6,720.86                             | 336.71                             | 0.70                                  | 0.91                                | 0.00                               | 0.00                             | 6,721.56                                        | 16.5                                                  | 0.000                 |
| Italy                            | 571.39                               | 305.60                             | 0.00                                  | 0.00                                | 0.00                               | 0.00                             | 571.39                                          | 10.0                                                  | 0.019                 |

| Country          | Mean, ESP 6 - 15% (km <sup>2</sup> ) | SD, ESP 6 - 15% (km <sup>2</sup> ) | Mean, ESP 15 - 30% (km <sup>2</sup> ) | SD, ESP 15 - 30% (km <sup>2</sup> ) | Mean, ESP ≥ 30% (km <sup>2</sup> ) | SD, ESP ≥ 30% (km <sup>2</sup> ) | Mean of sodic area, ESP ≥ 6% (km <sup>2</sup> ) | 1980 - 2018 trend (km <sup>2</sup> yr <sup>-1</sup> ) | p-value (1980 - 2018) |
|------------------|--------------------------------------|------------------------------------|---------------------------------------|-------------------------------------|------------------------------------|----------------------------------|-------------------------------------------------|-------------------------------------------------------|-----------------------|
| Jamaica          | 2.30                                 | 2.19                               | 0.00                                  | 0.00                                | 0.00                               | 0.00                             | 2.30                                            | -0.1                                                  | 0.009                 |
| Japan            | 0.03                                 | 0.15                               | 0.00                                  | 0.00                                | 0.00                               | 0.00                             | 0.03                                            | 0.0                                                   | 0.073                 |
| Jordan           | 67,658.45                            | 1,984.86                           | 551.32                                | 150.22                              | 0.00                               | 0.00                             | 68,209.77                                       | 61.8                                                  | 0.033                 |
| Kazakhstan       | 1,152,995.42                         | 94,477.26                          | 24,518.30                             | 5,620.83                            | 0.00                               | 0.00                             | 1,177,513.72                                    | -3,516.1                                              | 0.009                 |
| Kenya            | 50,245.27                            | 9,298.22                           | 512.15                                | 268.42                              | 0.00                               | 0.00                             | 50,757.42                                       | -124.2                                                | 0.358                 |
| Kuwait           | 15,613.91                            | 124.84                             | 72.18                                 | 73.43                               | 0.00                               | 0.00                             | 15,686.09                                       | 2.8                                                   | 0.007                 |
| Kyrgyzstan       | 3,933.39                             | 779.11                             | 18.52                                 | 15.88                               | 0.00                               | 0.00                             | 3,951.91                                        | -48.6                                                 | 0.000                 |
| Laos             | 7.39                                 | 33.74                              | 0.00                                  | 0.00                                | 0.00                               | 0.00                             | 7.39                                            | -0.1                                                  | 0.874                 |
| Latvia           | 3.47                                 | 15.52                              | 0.00                                  | 0.00                                | 0.00                               | 0.00                             | 3.47                                            | -0.1                                                  | 0.790                 |
| Lebanon          | 67.54                                | 35.43                              | 0.00                                  | 0.00                                | 0.00                               | 0.00                             | 67.54                                           | -0.8                                                  | 0.108                 |
| Lesotho          | 17.77                                | 17.24                              | 0.00                                  | 0.00                                | 0.00                               | 0.00                             | 17.77                                           | 0.2                                                   | 0.435                 |
| Liberia          | 0.09                                 | 0.26                               | 0.00                                  | 0.00                                | 0.00                               | 0.00                             | 0.09                                            | 0.0                                                   | 0.650                 |
| Libya            | 239,674.27                           | 23,913.78                          | 82.31                                 | 11.14                               | 0.00                               | 0.00                             | 239,756.59                                      | 100.6                                                 | 0.772                 |
| Lithuania        | 3.43                                 | 14.56                              | 0.00                                  | 0.00                                | 0.00                               | 0.00                             | 3.43                                            | -0.3                                                  | 0.097                 |
| Macedonia        | 0.05                                 | 0.31                               | 0.00                                  | 0.00                                | 0.00                               | 0.00                             | 0.05                                            | 0.0                                                   | 0.431                 |
| Madagascar       | 397.87                               | 205.02                             | 0.00                                  | 0.00                                | 0.00                               | 0.00                             | 397.87                                          | -1.6                                                  | 0.596                 |
| Malawi           | 108.54                               | 98.18                              | 0.00                                  | 0.00                                | 0.00                               | 0.00                             | 108.54                                          | 1.2                                                   | 0.379                 |
| Malaysia         | 203.87                               | 123.33                             | 0.00                                  | 0.00                                | 0.00                               | 0.00                             | 203.87                                          | 1.8                                                   | 0.313                 |
| Mali             | 75,362.91                            | 16,841.52                          | 10.00                                 | 26.70                               | 0.02                               | 0.13                             | 75,372.93                                       | -763.0                                                | 0.001                 |
| Malta            | 0.21                                 | 0.46                               | 0.00                                  | 0.00                                | 0.00                               | 0.00                             | 0.21                                            | 0.0                                                   | 0.950                 |
| Mauritania       | 87,249.26                            | 9,205.02                           | 176.88                                | 36.66                               | 0.00                               | 0.00                             | 87,426.14                                       | -483.9                                                | 0.000                 |
| Mexico           | 253,139.40                           | 18,967.02                          | 1,567.56                              | 461.44                              | 0.00                               | 0.00                             | 254,706.96                                      | 383.0                                                 | 0.166                 |
| Moldova          | 0.69                                 | 4.02                               | 0.00                                  | 0.00                                | 0.00                               | 0.00                             | 0.69                                            | 0.0                                                   | 0.576                 |
| Mongolia         | 490,605.97                           | 21,187.50                          | 11,782.06                             | 1,966.31                            | 0.44                               | 1.29                             | 502,388.47                                      | 166.0                                                 | 0.589                 |
| Morocco          | 73,776.38                            | 9,306.70                           | 177.78                                | 17.01                               | 0.00                               | 0.00                             | 73,954.17                                       | -289.3                                                | 0.027                 |
| Mozambique       | 3,171.49                             | 1,805.45                           | 0.12                                  | 0.75                                | 0.00                               | 0.00                             | 3,171.60                                        | -71.1                                                 | 0.004                 |
| Myanmar          | 759.43                               | 1,198.80                           | 0.00                                  | 0.00                                | 0.00                               | 0.00                             | 759.43                                          | -19.0                                                 | 0.271                 |
| Namibia          | 91,363.26                            | 6,806.23                           | 7.11                                  | 8.64                                | 0.00                               | 0.00                             | 91,370.37                                       | -200.3                                                | 0.037                 |
| Nepal            | 1,318.28                             | 1,002.96                           | 0.00                                  | 0.00                                | 0.00                               | 0.00                             | 1,318.28                                        | -3.8                                                  | 0.797                 |
| Netherlands      | 0.03                                 | 0.17                               | 0.00                                  | 0.00                                | 0.00                               | 0.00                             | 0.03                                            | 0.0                                                   | 0.485                 |
| New Zealand      | 0.03                                 | 0.14                               | 0.00                                  | 0.00                                | 0.00                               | 0.00                             | 0.03                                            | 0.0                                                   | 0.020                 |
| Nicaragua        | 23.28                                | 125.62                             | 0.00                                  | 0.00                                | 0.00                               | 0.00                             | 23.28                                           | -0.8                                                  | 0.680                 |
| Niger            | 65,697.80                            | 11,906.57                          | 0.00                                  | 0.00                                | 0.00                               | 0.00                             | 65,697.80                                       | 199.3                                                 | 0.245                 |
| Nigeria          | 4,498.27                             | 5,989.30                           | 3.36                                  | 14.11                               | 0.00                               | 0.00                             | 4,501.63                                        | -73.5                                                 | 0.396                 |
| North Korea      | 11.43                                | 33.07                              | 0.00                                  | 0.00                                | 0.00                               | 0.00                             | 11.43                                           | 1.1                                                   | 0.014                 |
| Northern Cyprus  | 54.39                                | 56.78                              | 0.00                                  | 0.00                                | 0.00                               | 0.00                             | 54.39                                           | 0.1                                                   | 0.872                 |
| Oman             | 105,289.20                           | 5,868.45                           | 1.13                                  | 1.42                                | 0.00                               | 0.00                             | 105,290.33                                      | 75.6                                                  | 0.372                 |
| Pakistan         | 398,545.71                           | 19,378.30                          | 1,772.13                              | 1,204.69                            | 0.32                               | 1.58                             | 400,318.16                                      | 958.7                                                 | 0.000                 |
| Palestina        | 797.15                               | 149.99                             | 1.31                                  | 2.83                                | 0.00                               | 0.00                             | 798.45                                          | 6.0                                                   | 0.004                 |
| Panama           | 2.30                                 | 14.23                              | 0.00                                  | 0.00                                | 0.00                               | 0.00                             | 2.30                                            | -0.1                                                  | 0.671                 |
| Papua New Guinea | 19.50                                | 53.35                              | 0.00                                  | 0.00                                | 0.00                               | 0.00                             | 19.50                                           | 0.0                                                   | 0.993                 |
| Paraguay         | 12,485.37                            | 12,676.35                          | 0.00                                  | 0.00                                | 0.00                               | 0.00                             | 12,485.37                                       | -492.2                                                | 0.005                 |

| Country                  | Mean, ESP 6 - 15% (km <sup>2</sup> ) | SD, ESP 6 - 15% (km <sup>2</sup> ) | Mean, ESP 15 - 30% (km <sup>2</sup> ) | SD, ESP 15 - 30% (km <sup>2</sup> ) | Mean, ESP ≥ 30% (km <sup>2</sup> ) | SD, ESP ≥ 30% (km <sup>2</sup> ) | Mean of sodic area, ESP ≥ 6% (km <sup>2</sup> ) | 1980 - 2018 trend (km <sup>2</sup> yr <sup>-1</sup> ) | p-value (1980 - 2018) |
|--------------------------|--------------------------------------|------------------------------------|---------------------------------------|-------------------------------------|------------------------------------|----------------------------------|-------------------------------------------------|-------------------------------------------------------|-----------------------|
| Peru                     | 78,620.16                            | 4,684.19                           | 3.46                                  | 4.23                                | 0.00                               | 0.00                             | 78,623.62                                       | -248.6                                                | 0.000                 |
| Philippines              | 79.56                                | 134.01                             | 0.00                                  | 0.00                                | 0.00                               | 0.00                             | 79.56                                           | 2.7                                                   | 0.157                 |
| Poland                   | 0.12                                 | 0.38                               | 0.00                                  | 0.00                                | 0.00                               | 0.00                             | 0.12                                            | 0.0                                                   | 0.158                 |
| Portugal                 | 1.93                                 | 3.94                               | 0.00                                  | 0.00                                | 0.00                               | 0.00                             | 1.93                                            | -0.1                                                  | 0.078                 |
| Puerto Rico              | 0.69                                 | 2.31                               | 0.00                                  | 0.00                                | 0.00                               | 0.00                             | 0.69                                            | 0.0                                                   | 0.454                 |
| Qatar                    | 10,239.71                            | 65.80                              | 48.01                                 | 64.82                               | 0.00                               | 0.00                             | 10,287.72                                       | 0.4                                                   | 0.036                 |
| Republic of Congo        | 129.20                               | 122.21                             | 0.00                                  | 0.00                                | 0.00                               | 0.00                             | 129.20                                          | 4.0                                                   | 0.019                 |
| Romania                  | 136.44                               | 111.90                             | 0.00                                  | 0.00                                | 0.00                               | 0.00                             | 136.44                                          | 0.7                                                   | 0.669                 |
| Rwanda                   | 1.18                                 | 2.11                               | 0.00                                  | 0.00                                | 0.00                               | 0.00                             | 1.18                                            | -0.1                                                  | 0.001                 |
| Saint-Martin             | 0.08                                 | 0.31                               | 0.00                                  | 0.00                                | 0.00                               | 0.00                             | 0.08                                            | 0.0                                                   | 0.401                 |
| Saudi Arabia             | 677,693.88                           | 41,498.95                          | 87.12                                 | 66.44                               | 0.00                               | 0.00                             | 677,781.00                                      | 2,256.2                                               | 0.000                 |
| Senegal                  | 2,044.49                             | 1,720.61                           | 3.31                                  | 5.70                                | 0.00                               | 0.00                             | 2,047.80                                        | -114.8                                                | 0.000                 |
| Serbia                   | 2.11                                 | 2.80                               | 0.00                                  | 0.00                                | 0.00                               | 0.00                             | 2.11                                            | 0.0                                                   | 0.276                 |
| Sierra Leone             | 34.69                                | 55.96                              | 0.00                                  | 0.00                                | 0.00                               | 0.00                             | 34.69                                           | -0.3                                                  | 0.670                 |
| Singapore                | 0.18                                 | 0.84                               | 0.00                                  | 0.00                                | 0.00                               | 0.00                             | 0.18                                            | 0.0                                                   | 0.068                 |
| Slovakia                 | 9.87                                 | 25.83                              | 0.00                                  | 0.00                                | 0.00                               | 0.00                             | 9.87                                            | -1.0                                                  | 0.005                 |
| Solomon Islands          | 0.89                                 | 3.20                               | 0.00                                  | 0.00                                | 0.00                               | 0.00                             | 0.89                                            | -0.1                                                  | 0.004                 |
| Somalia                  | 85,739.52                            | 12,169.87                          | 0.60                                  | 0.98                                | 0.00                               | 0.00                             | 85,740.12                                       | 398.3                                                 | 0.019                 |
| South Africa             | 30,585.66                            | 7,201.22                           | 0.10                                  | 0.39                                | 0.00                               | 0.00                             | 30,585.76                                       | -335.9                                                | 0.000                 |
| South Korea              | 0.85                                 | 1.37                               | 0.00                                  | 0.00                                | 0.00                               | 0.00                             | 0.85                                            | 0.0                                                   | 0.038                 |
| South Sudan              | 4,256.83                             | 4,513.56                           | 0.00                                  | 0.00                                | 0.00                               | 0.00                             | 4,256.83                                        | -162.4                                                | 0.009                 |
| Spain                    | 560.95                               | 174.23                             | 0.00                                  | 0.00                                | 0.00                               | 0.00                             | 560.95                                          | -0.4                                                  | 0.873                 |
| Sri Lanka                | 20.35                                | 17.33                              | 0.00                                  | 0.00                                | 0.00                               | 0.00                             | 20.35                                           | 0.1                                                   | 0.705                 |
| Sudan                    | 120,928.87                           | 24,802.58                          | 208.71                                | 180.55                              | 0.00                               | 0.00                             | 121,137.58                                      | -1,190.5                                              | 0.000                 |
| Suriname                 | 0.17                                 | 1.09                               | 0.00                                  | 0.00                                | 0.00                               | 0.00                             | 0.17                                            | 0.0                                                   | 0.335                 |
| Swaziland                | 1.49                                 | 2.46                               | 0.00                                  | 0.00                                | 0.00                               | 0.00                             | 1.49                                            | 0.0                                                   | 0.588                 |
| Sweden                   | 0.66                                 | 1.91                               | 0.00                                  | 0.00                                | 0.00                               | 0.00                             | 0.66                                            | 0.0                                                   | 0.686                 |
| Switzerland              | 9.03                                 | 7.20                               | 0.00                                  | 0.00                                | 0.00                               | 0.00                             | 9.03                                            | -0.5                                                  | 0.000                 |
| Syria                    | 123,697.38                           | 7,403.43                           | 479.93                                | 413.83                              | 0.00                               | 0.00                             | 124,177.30                                      | 316.7                                                 | 0.002                 |
| Taiwan                   | 0.66                                 | 0.29                               | 0.00                                  | 0.00                                | 0.00                               | 0.00                             | 0.66                                            | 0.0                                                   | 0.002                 |
| Tajikistan               | 13,168.44                            | 982.59                             | 373.58                                | 198.73                              | 0.00                               | 0.00                             | 13,542.02                                       | -13.2                                                 | 0.372                 |
| Tanzania                 | 1,607.10                             | 549.61                             | 0.02                                  | 0.14                                | 0.00                               | 0.00                             | 1,607.12                                        | 18.3                                                  | 0.017                 |
| Thailand                 | 8,772.53                             | 10,338.59                          | 31.13                                 | 66.11                               | 0.02                               | 0.13                             | 8,803.68                                        | -306.7                                                | 0.035                 |
| Timor-Leste              | 1.02                                 | 1.96                               | 0.00                                  | 0.00                                | 0.00                               | 0.00                             | 1.02                                            | 0.1                                                   | 0.015                 |
| Togo                     | 552.78                               | 605.87                             | 0.00                                  | 0.00                                | 0.00                               | 0.00                             | 552.78                                          | -22.4                                                 | 0.007                 |
| Tunisia                  | 22,799.58                            | 2,648.03                           | 156.86                                | 190.38                              | 0.00                               | 0.00                             | 22,956.45                                       | -60.3                                                 | 0.111                 |
| Turkey                   | 25,912.43                            | 5,540.79                           | 1.09                                  | 1.46                                | 0.00                               | 0.00                             | 25,913.52                                       | -340.0                                                | 0.000                 |
| Turkmenistan             | 378,681.94                           | 14,504.83                          | 1,987.60                              | 1,227.82                            | 0.00                               | 0.00                             | 380,669.54                                      | 912.5                                                 | 0.000                 |
| Turks and Caicos Islands | 14.16                                | 13.05                              | 0.00                                  | 0.00                                | 0.00                               | 0.00                             | 14.16                                           | 0.2                                                   | 0.217                 |
| Uganda                   | 70.77                                | 165.29                             | 0.00                                  | 0.00                                | 0.00                               | 0.00                             | 70.77                                           | 1.5                                                   | 0.529                 |
| Ukraine                  | 257.02                               | 169.78                             | 0.00                                  | 0.00                                | 0.00                               | 0.00                             | 257.02                                          | 2.2                                                   | 0.368                 |
| United Arab Emirates     | 29,690.05                            | 1,112.37                           | 157.18                                | 204.86                              | 0.00                               | 0.00                             | 29,847.23                                       | 83.1                                                  | 0.000                 |

| Country              | Mean, ESP 6 - 15% (km <sup>2</sup> ) | SD, ESP 6 - 15% (km <sup>2</sup> ) | Mean, ESP 15 - 30% (km <sup>2</sup> ) | SD, ESP 15 - 30% (km <sup>2</sup> ) | Mean, ESP ≥ 30% (km <sup>2</sup> ) | SD, ESP ≥ 30% (km <sup>2</sup> ) | Mean of sodic area, ESP ≥ 6% (km <sup>2</sup> ) | 1980 - 2018 trend (km <sup>2</sup> yr <sup>-1</sup> ) | p-value (1980 - 2018) |
|----------------------|--------------------------------------|------------------------------------|---------------------------------------|-------------------------------------|------------------------------------|----------------------------------|-------------------------------------------------|-------------------------------------------------------|-----------------------|
| United States        | 244,008.42                           | 20,967.09                          | 12,421.72                             | 3,133.88                            | 11.14                              | 20.96                            | 256,441.28                                      | 1,316.6                                               | 0.000                 |
| Uruguay              | 315.90                               | 402.25                             | 0.00                                  | 0.00                                | 0.00                               | 0.00                             | 315.90                                          | 3.2                                                   | 0.588                 |
| Uzbekistan           | 274,290.01                           | 8,495.61                           | 9,344.50                              | 4,175.01                            | 0.00                               | 0.00                             | 283,634.51                                      | -11.7                                                 | 0.935                 |
| Vanuatu              | 0.38                                 | 1.39                               | 0.00                                  | 0.00                                | 0.00                               | 0.00                             | 0.38                                            | -0.1                                                  | 0.004                 |
| Venezuela            | 1,559.29                             | 2,819.07                           | 0.00                                  | 0.00                                | 0.00                               | 0.00                             | 1,559.29                                        | -47.4                                                 | 0.243                 |
| Vietnam              | 161.87                               | 459.80                             | 0.00                                  | 0.00                                | 0.00                               | 0.00                             | 161.87                                          | -2.9                                                  | 0.666                 |
| Virgin Islands, U.S. | 0.06                                 | 0.29                               | 0.00                                  | 0.00                                | 0.00                               | 0.00                             | 0.06                                            | 0.0                                                   | 0.528                 |
| Western Sahara       | 79,663.44                            | 5,560.93                           | 257.01                                | 14.40                               | 0.00                               | 0.00                             | 79,920.45                                       | -6.1                                                  | 0.940                 |
| Yemen                | 75,857.80                            | 17,624.44                          | 7.31                                  | 8.47                                | 0.00                               | 0.00                             | 75,865.11                                       | 1,054.6                                               | 0.000                 |
| Zambia               | 865.73                               | 1,306.79                           | 0.00                                  | 0.00                                | 0.00                               | 0.00                             | 865.73                                          | -42.6                                                 | 0.020                 |
| Zimbabwe             | 287.96                               | 373.02                             | 0.00                                  | 0.00                                | 0.00                               | 0.00                             | 287.96                                          | -5.5                                                  | 0.303                 |

## 6 Computer codes

This section provides the scripts and codes required to regenerate the results. Please note that ArcGIS Desktop 10.x license is needed to run ArcPy module. Also, the MATLAB Parallel Computing plus Statistics and Machine Learning toolboxes are required for running the MATLAB codes provided here.

### 6.1 Pre-processing the predictors' layers

The scripts provided in this sub-section show how we pre-processed the predictors assembled from the different sources and made them ready for data extraction. We refer the reader to [Table S1](#) to see the corresponding pre-processing steps for each individual predictor.

Static topographic predictors including slope (degrees), plan and profile curvatures, slope length (m), and Terrain Ruggedness Index (TRI) were calculated in SAGA GIS GUI (Graphical User Interface) from CGIAR CSI SRTM 90 m Digital Elevation Database v4.1. The original DEM (Digital Elevation Model) data were resampled to 250 m and saved in three separate raster datasets named: North East, South East, and West. We downloaded these three layers, mosaicked them in ArcGIS for Desktop environment (herein we refer to its central application: ArcMap) and exported the generated global layer as a single geo-tiff. To generate the map of the topographic predictors including slope, slope length, TRI, plan, and profile curvatures, it was necessary to have the original DEM in a projected coordinates system. For computing those topographic predictors, we first projected the global DEM layer to World Mercator coordinates system (with 259.511 m spatial resolution) using ArcMap “raster project” tool. To reduce the computational load and avoid system crashes in SAGA GIS, we produced a separate DEM layer in the World Mercator coordinates system, however, at 1,000 m spatial resolution to generate the maps of slope length and TRI. For the plan and profile curvatures, the 10 parameter 3<sup>rd</sup> order polynomial method was used. Also, we used a square cell with radius of three for calculation of TRI.

Other static predictors were directly pre-processed (including projections and per-cell statistics) through ArcMap GUI and the following scripts are not applicable to those predictors. Soil texture raster datasets of clay, silt, and sand content at different depths were averaged using ArcMap “raster calculator” tool. To get an average of soil texture properties between soil surface and 100 cm depth from the available values of SoilGrids250 datasets for five standard depths of 0, 15, 30, 60, and 100 cm, we applied the trapezoidal rule as follows:

*Soil texture property average between 0 and 100 cm =*

$$[(15 - 0) \times (R_{val}(15) + R_{val}(0)) + (30 - 15) \times (R_{val}(30) + R_{val}(15)) + \dots \\ (60 - 30) \times (R_{val}(60) + R_{val}(30)) + (100 - 60) \times (R_{val}(100) + R_{val}(60))] / (100 \times 2),$$

where  $R_{val}(depth)$  was the raster value at the corresponding depth.

Some predictors were originally in an .hdf format. HDF files were composed of different layers (or sub-datasets) and we required only one or two layers from those sub-datasets. An example of these kind of predictors was VIP30 v. 004 dataset and NDVI and EVI2 layers were the required sub-datasets. We used the following Python code to automatize the processes of extracting the desirable sub-dataset layers:

```
## Extract sub-dataset, we used PyCharm Python IDE (Integrated Development Environment)
## Usage: Extracting the required sub-datasets from predictors with .hdf format and saving the
## final sub-dataset as a geo-tiff.

import arcpy # Importing the ArcPy module
import os # Importing Miscellaneous operating system module required for reading the file
names in a directory
import os, fnmatch
```

```

# Setting the geo-processing environments
arcpy.env.overwriteOutput = True
arcpy.env.workspace = r"The directory of .hdf files"
arcpy.env.geographicTransformations = arcpy.SpatialReference(4326) # Setting the output
coordinates as WGS 1984

# Reading the .hdf files needed to be processed from a directory
path = r" The directory of .hdf files "
pattern = "*.hdf"
hdf_files = [ff for ff in os.listdir(path) if fnmatch.fnmatch(ff, pattern)]

for i in range(0,len(hdf_files)):
    # i is index of the .hdf file
    arcpy.ExtractSubDataset_management(hdf_files[i],"Output directory"+str(i)+".tif", "S_N")
    # Extracting the sub-dataset and saving as geo-tiff using ArcPy ExtractSubDataset_management
    # S_N is the sub-dataset number in .hdf file

```

In some cases, the original files were in an .nc format. To convert those netcdf files to raster layers we used the following Python code:

```

## Making raster layers from a netcdf file,
## Usage: This code first extracts the different temporal layers of the netcdf files and then
## saves each layer as a separate raster file in .tif format.

import arcpy # Importing the ArcPy module and spatial analysis required functions
from arcpy import env
from arcpy.sa import *
import os # Importing Miscellaneous operating system module required for reading the file
names in a directory
import os, fnmatch

# Setting the ArcPy geo-processing environments
arcpy.env.overwriteOutput = True
arcpy.env.workspace = r"The directory of the nc files"
arcpy.env.geographicTransformations = arcpy.SpatialReference(4326) # Setting the output
coordinates as WGS 1984

# Reading the nc files in the directory where they are stored
path = r" The directory of the nc files"
nc_files = [f for f in os.listdir(path) if f.endswith(".nc")]

# i is index of the nc file
for i in range(0,len(nc_files)):
    inNetCDFFile = nc_files[i]
    variable = " The name of the variable in the netcdf file"
    XDimension = "longitude" # In the netcdf file
    YDimension = "latitude" # In the netcdf file
    outRasterLayer = "Created_layer"
    bandDimension = "" # Varies depending on the band dimension (time) name in the nc file
    dimensionValues = ""
    valueSelectionMethod = ""
    # Executing ArcPy the MakeNetCDFRasterLayer md tool
    arcpy.MakeNetCDFRasterLayer_md(inNetCDFFile, variable, XDimension, YDimension,\
        outRasterLayer, bandDimension, dimensionValues,\
        valueSelectionMethod)
    # Saving the created layers in memory
    arcpy.SaveToLayerFile_management('Created_layer', 'Temporaty_saved_layer'+str(i))
    # Saving the created layers on the disk
    arcpy.CopyRaster_management('Temporaty_saved_layer'+str(i)+'.lyr',"Output
location"+str(i)+'.tif')

```

After converting all predictors’ datasets to raster layers, we used the ArcPy “cell-statistics” geo-processing tool to calculate the per-cell average of dynamic predictors. Temporal resolution of the predictors was different. First we generated the annual averages of each predictor. For the predictors with decadal averaging window, we calculated the average in each year from 1971 to 2018. For the predictors with 5-year averaging window, we computed annual averages from 1976. For the rest of predictors, we generated annual averages from 1980. Unfortunately, vegetation indices data including NDVI, EVI2, LAI, and FAPAR were not

available for 1980. Therefore, we produced their layers by calculating an average between 1981 and 1985. For instance, we generated the raster layer of NDVI in 1980 (which was missing in the original VIP30 v. 004 dataset) by calculating the per-cell average of NDVI raster layers between 1981 and 1985. Then we computed running window averages of the predictors with decadal and five-year averaging windows (Table S1) from 1980 to 2018 using the following Python code. For each particular predictor and each year between 1980 and 2018, a raster layer representing the average of the corresponding predictor in the averaging window was generated. We named (labelled) these raster layers with the predictor's name as a prefix and the number of the year to which the raster layer was corresponded. Final averaged rasters of each predictor were saved in separate directories for extraction of the values and further processing.

```
## Calculation of per cell average for predictors with decadal and five-year averaging window,
## Usage: this code gets a large number of rasters in a directory and calculates the per cell
## average of the rasters
## and generates a final raster layer which is the average of input rasters.

import arcpy # Importing the ArcPy module
from arcpy import env
from arcpy.sa import * # Importing all functions from ArcPy spatial analyst toolbox
import os # Importing Miscellaneous operating system module required for reading the file
names in a directory
import os, fnmatch

# Setting the geo-processing environments
arcpy.env.workspace = r"The directory of rasters for each particular predictor"
arcpy.env.extent = "MAXOF"
arcpy.env.overwriteOutput = True
arcpy.env.geographicTransformations = arcpy.SpatialReference(4326) # Setting the output
coordinates as WGS 1984

C = "Raster name prefix"
for i in range(1980, 2019):
    # i is the index of year
    # Execution of the cell-statistics tool
    # For predictors with decadal averaging window:
    outCellStatistics = ([C + str(i) + ".tif", C + str(i-1) + ".tif", C + str(i-2) + ".tif",..., C
    + str(i-9) + ".tif"], "MEAN", "DATA")
    # For predictors with five-year averaging window:
    outCellStatistics = ([C + str(i) + ".tif", C + str(i-1) + ".tif", C + str(i-2) + ".tif",..., C
    + str(i-4) + ".tif"], "MEAN", "DATA")
    # The output of cell-statistics is temporary (saved on memory)
    # Saving the output of cell-statistics on the disk
    outCellStatistics.save("Output folder/Predictor_name_" + str(i) + ".tif")
```

Some pixels were missing in the final generated rasters of the predictors; mostly in layers of the remotely sensed soil moisture and vegetation indices. We filled the spatial gaps (pixels with null values) in the data layers using the mean of surrounding pixels. A circle with radius of 4 from the neighbouring cells of the gap was used to calculate the mean through application of the following Python code:

```
## Filling the gaps in rasters,
## Usage: This code fills the gaps (null cells) in generated rasters for extraction of
## predictors' values.

import arcpy # Importing the ArcPy module
from arcpy import env
from arcpy.sa import * # importing the functions of spatial analyst toolbox
# Importing Miscellaneous operating system module required for reading the file names in a
directory
import os
import os, fnmatch

# Setting the geo-processing environments
arcpy.env.parallelProcessingFactor = "100%"
arcpy.env.workspace = r"The directory of rasters"
```



```

arcpy.env.extent = "MAXOF"
arcpy.CheckOutExtension("Spatial")

# Acquiring all rasters within a directory
path = r" The directory of rasters "
pattern = "*.tif"
tif_files = [ff for ff in os.listdir(path) if fnmatch.fnmatch(ff, pattern)]

# i is index of the .tif file
for i in range(0, len(tif_files)):
    string = tif_files[i] # raster layer name
    string_1 = string[0:(len(string)-4)] # Raster layer name without .tif suffix
    # Execution of the Filling. This part is a combination of ArcPy Focal Statistics and Raster
    # Calculator tools
    # A circle with radius of 4 from the neighbouring cells of the gap is used to calculate the
    # average and gap is filled by the average value
    Rasterfilled = Con(IsNull(string), FocalStatistics(string, NbrCircle(4, "CELL"), "MEAN", "DATA"),
    string)
    # The output is temporary (saved on memory) and the following saves it on the disk
    arcpy.CopyRaster_management(Rasterfilled, r"The output directory"+string_1+".tif")

```

## 6.2 Extracting the predictors' values to training point feature layers

Merging of the training datasets (for ESP) from different source datasets and their pre-processing (see Methods, Data) was fully accomplished in ArcMap GUI and corresponding toolboxes. The indicator of the missing values in original training datasets was replaced by -9,999, soil layers attributes were joined to their corresponding geo-referenced profile locations, and the valid range for ESP was assumed to be 0 to 100%. Then we removed the profiles in AfSP and WISE datasets that spatially intersect the NCSS profiles and merged these three datasets into a single inventory. The final training datasets were saved as a point feature class (.shp format) file. We first projected these layers in ArcMap environment to World Mercator coordinates system to extract the values of static predictors in the World Mercator projection. We projected the point shape files instead of rasters to avoid data loss due to raster resampling.

After extraction, the two shape files were re-projected to WGS 1984 coordinates system to extract the values of other predictors. For all static predictors, the extractions were directly conducted by “extract multi values to points” tool from ArcMap “spatial analyst” toolbox. However, for the dynamic predictors, first we applied the ArcPy “select layer by attribute” tool to the point features classes and divided the points according to the year of acquisition. In detail, in each point feature class, there were some points with x- and y- spatial coordinates values representing the locations where soil EC<sub>e</sub> and ESP were sampled. In the attribute table of these x- y- points, the year of acquisition of the sample, lower sample's depth, upper sample's depth (from the soil surface), and the measured values of EC<sub>e</sub> or ESP for that sample were reported. We selected the samples with the same year of acquisition and exported the selected samples as new point feature classes for further processing and extraction of the dynamic predictors' values. Therefore, a total of 39 point feature layers labelled by the year of acquisition of samples were generated (since 1980). The following Python script shows the selection process:

```

## Select by attribute,
## Usage: This code selects the points in original datasets (needed for training) based on the
## year of acquisition in attribute table.
## This code splits the point feature layers of the training datasets into smaller point
## feature layers. Each smaller layer is labelled by the name of the year.

import arcpy # Importing the ArcPy module

# Setting the geo-processing environments
arcpy.env.workspace = r"The directory of training datasets"
arcpy.env.overwriteOutput = True
# Importing the original dataset feature point layer into memory
arcpy.MakeFeatureLayer_management("ESP/ECe.shp", "lyr")
# CC is the prefix of the generated point feature layers ECE_ or ESP_ for each year
CC = "" or ""

```

```

for i in range (1980,2019):
    # i is index of the year # -9999 is the index of the missing data
    arcpy.SelectLayerByAttribute_management("lyr", "NEW_SELECTION", "Year >= '"+str(i)+"' AND
    Year < '"+str(i+1)+"' AND NOT Year = '-9999'")
    arcpy.CopyFeatures_management('lyr', "Output directory/"+CC+str(i))

```

Then we extracted the values of the predictors at each year corresponding to the year of acquisition of the point feature layer using ArcPy “extract multi values to points” geo-processing tool as follows:

```

## Extract multi values to training sets' data points,
## Usage: This code extracts the values of each predictor's raster layer (labelled by year) to
## point feature layer of the training datasets labelled with the similar year. The extracted
## values emerges in the attribute table of the point feature dataset.

import arcpy # Importing the ArcPy module
from arcpy import env
from arcpy.sa import * # Importing all functions in spatial analyst toolbox

# Setting the geo-processing environments
arcpy.CheckOutExtension("Spatial") # Checking for the spatial analyst license
arcpy.env.workspace = r"The directory of point feature layers" # The directory should also
include the dynamic predictors' raster layers
C = "the prefix of the point feature layers for each year"

# i is index of the year
for i in range(1980,2019):
    # Execution of extraction # For each predictor this loop has to iterate
    inRasterList = [{"Raster layer name" + str(i) + ".tif", "Name of the extracted value in
    attribute table of the point feature layer"}]
    inPointFeatures = C + str(i) + ".shp"
    ExtractMultiValuesToPoints(inPointFeatures, inRasterList)

```

The extracted values of each predictor were added to the attribute table of individual years' point feature layers. The attribute tables were composed of columns with headers named after the predictors and rows representing the sample observations. After extraction of the predictors' values, the point features layers were merged by ArcMap “merge” tool and the final attribute tables were exported as text files (.txt format). These text files were imported to MATLAB for fitting the models and further analysis.

### 6.3 Model training

The prepared text files were then imported to MATLAB workspace. We calculated the linear Pearson correlation coefficients between each predictor and target variables as a univariate criterion to filter the unnecessary predictors, assuming no interaction between the predictors (

Table S24). The Pearson correlation coefficients between the predictors and target variables were non-significant; so we retrieved all predictors for further modelling. Initially, we used MATLAB Regression and Classification Learner applications to examine the performance of different built-in models available in MATLAB Statistics and Machine Learning toolbox. We used two-part models for mapping the relation between predictors and target variables. We held out 25% of the training sets and fitted the models with default models' hyperparameters. Tree-based ensemble models were the most suitable among other models for our regression and classification tasks (see [Table S6](#)).

**Table S24: Pearson's linear correlation coefficient between the non-categorical predictors' values and target variables (EC<sub>e</sub> or ESP).** Pearson's correlation coefficients equal to -1 and +1 indicate perfect negative and positive correlations between predictor and variable, respectively. For the full name of the predictors see [Table S1](#).

| Predictor name                          | EC <sub>e</sub>                 | ESP                             |
|-----------------------------------------|---------------------------------|---------------------------------|
|                                         | Pearson correlation coefficient | Pearson correlation coefficient |
| Sample's upper depth                    | 0.083                           | 0.120                           |
| Sample's lower depth                    | 0.087                           | 0.128                           |
| Elevation                               | -0.075                          | 0.060                           |
| Plan curvature                          | -0.013                          | -0.006                          |
| Profile curvature                       | 0.002                           | 0.000                           |
| Slope                                   | -0.121                          | -0.115                          |
| Slope length                            | 0.007                           | 0.068                           |
| Terrain Ruggedness Index                | -0.118                          | -0.102                          |
| Fertilizer input for C3 annual crops    | -0.028                          | -0.050                          |
| Fertilizer input for C3 perennial crops | 0.055                           | 0.024                           |
| Water table depth                       | -0.083                          | -0.018                          |
| Aspect                                  | 0.015                           | -0.018                          |
| Topographic index                       | 0.119                           | 0.106                           |
| Soil clay content                       | -0.166                          | 0.085                           |
| Soil silt content                       | 0.049                           | -0.123                          |
| Soil sand content                       | 0.092                           | 0.064                           |
| Soil-sedimentary thickness              | 0.133                           | 0.138                           |
| Average rooting depth                   | -0.070                          | 0.022                           |
| Diurnal temperature range               | -0.040                          | 0.140                           |
| Precipitation                           | -0.127                          | -0.209                          |
| Average temperature                     | -0.058                          | 0.046                           |
| Maximum temperature                     | -0.067                          | 0.073                           |
| Minimum temperature                     | -0.049                          | 0.020                           |
| Root-zone soil moisture                 | -0.115                          | -0.220                          |
| PDSI                                    | 0.029                           | -0.064                          |
| Soil surface moisture (2 - 5 cm)        | -0.091                          | -0.204                          |
| Evaporative stress factor               | -0.054                          | -0.218                          |
| EVI2                                    | -0.180                          | -0.254                          |
| NDVI                                    | -0.191                          | -0.268                          |
| FAPAR                                   | -0.200                          | -0.262                          |
| LAI                                     | -0.165                          | -0.240                          |
| Wind speed                              | 0.159                           | 0.071                           |
| Soil surface (skin) temperature         | -0.020                          | 0.076                           |
| Soil layer one temperature              | -0.012                          | 0.101                           |
| Soil layer two temperature              | -0.016                          | 0.100                           |
| Soil layer three temperature            | -0.015                          | 0.100                           |
| Soil layer four temperature             | -0.015                          | 0.101                           |
| Potential evapotranspiration            | 0.047                           | 0.175                           |
| Water deficit                           | 0.161                           | 0.271                           |
| Actual evapotranspiration               | -0.178                          | -0.229                          |

For the classification part, we used MATLAB “fitensemble” function. We ignored the slight imbalance between the classes in ESP training set. To resolve the presence of imbalance between the classes of EC<sub>e</sub> training dataset, however, application of under-sampling, over-sampling (using Synthetic Minority Over-sampling Technique: SMOTE (6)), and/or a

combination of these two techniques was possible. Also MATLAB “fitcensemble” allowed us to modify the misclassification cost matrix to handle the imbalance in classes. We developed the following MATLAB script to inspect the effect of abovementioned solutions on performance of the fitted models by “fitcensemble” function:

```

clc;
clear;
%% Effect of misclassification cost, over-sampling, and under-sampling,
%% Usage: This code will examine the effect of altering the misclassification
%% cost of the class with lower number of samples in imbalanced binary classification. Also
%% it examines the effect of under-sampling from the class with higher number
%% of samples, over-sampling from the class with lower number of samples,
%% and a combination of these methods. For each method, combined effect of
%% manipulating the misclassification cost is also analysed. For
%% over-sampling, we have used Synthetic Minority Over-Sampling
%% Technique (SMOTE). We implemented MATLAB R2019 for running this.

ECe = readtable('Location of the ECe training dataset on the disk','FileType',...
    'text','Delimiter',' ','PreserveVariableNames',true); % Importing the table of training
    % dataset which is ECe here

%% Preparing the table
table = standardizeMissing(ECe,-9999);% Converting the cells with missing values indicator
% (-9999) to MATLAB standard NaN
table.FID = [];
table.Year = [];
table(sum(ismissing(table),2) > 0,:) = [];% Dropping the rows with missing values
edges = [0 2 100];% Setting the classes edges
table.ECe = discretize(table.ECe,edges); % Discretising the ECe values into two classes,
% saline and non-saline

%% Partitioning
% This part partitions the original dataset to training (75%) and test sets (25%)
c = cvpartition(table.ECe, 'Holdout',0.25, 'Stratify',true); % Data will be stratified between
% the two sets; this assures that data from both classes are available in the two final sets
idx1 = test(c);
idx2 = training(c);
Test = table(idx1(:)==1,:);
Training = table(idx2(:)==1,:);

%% Preparing required tables for training and validation
% Categorizing the categorical variables in the test set
Test.Main_litho = categorical(Test.Main_litho);
Test.WRB = categorical(Test.WRB);
Test.LC = categorical(Test.LC);
TrueLabels = Test.ECe;
Class_1 = Training(Training.ECe == 1,:);
Class_1_refilled = Training(Training.ECe == 1,:);
Class_2 = Training(Training.ECe == 2,:);
% Categorizing the categorical variables in the training set
Training.Main_litho = categorical(Training.Main_litho);
Training.WRB = categorical(Training.WRB);
Training.LC = categorical(Training.LC);

%% Model Training
%% Calculating the classification accuracy metrics for different misclassification costs
%% 'i' for the misclassification cost

Row = 1;
Accuracy_Metrics = zeros(13,10);
for i = 1:0.25:4
% Each iteration of 'i' changes the misclassification cost of the class with lower number of
% samples in fitcensemble function misclassification cost matrix
% For hyperparameter optimisation, 130 iterations are conducted to evaluate the objective
% function. Holdout set (with %25 held out) was used to evaluate the objective function
% 'ens' is the object of the final trained model
ens = fitcensemble(Training,'ECe','Cost',[0 1;i 0],'OptimizeHyperparameters',...
    {'Method','LearnRate','NumLearningCycles','MinLeafSize','MaxNumSplits',...
    'NumVariablesToSample','SplitCriterion'},'HyperparameterOptimisationOptions',...
    struct('Holdout',.25,'UseParallel',true,'MaxObjectiveEvaluations',130,'Repartition',true,'Show
    Plots',false,'Verbose',0));
    %%Obtaining validation metrics
    Predictedlabels = predict(ens,Test);
    % Tp = True Positive, Fn = False Negative , Fp = False Positive, Tn = True Negative

```

```

C = confusionmat(TrueLabels,Predictedlabels); Tp = C(1,1); Fn = C(1,2); Fp = C(2,1); Tn =
C(2,2);
Accuracy_Metrics(Row,1) = i;
Accuracy_Metrics(Row,2) = Tp; Accuracy_Metrics(Row,3) = Fn;
Accuracy_Metrics(Row,4) = Fp; Accuracy_Metrics(Row,5) = Tn;
Accuracy_Metrics(Row,6) = loss(ens,Test,'ECe'); % Binary misclassification loss
Accuracy_Metrics(Row,7) = (Tp+Tn)/(Tp+Fp+Fn+Tn)*100; % Binary classification accuracy
Accuracy_Metrics(Row,8) = Tp/(Tp+Fp); % Precision
Accuracy_Metrics(Row,9) = Tp/(Tp+Fn); % Recall
%MCC (Matthews Correlation Coefficient) for binary imbalanced classification
Accuracy_Metrics(Row,10) = ((Tp*Tn)-(Fp*Fn))/sqrt((Tp+Fp)*(Tp+Fn)*(Tn+Fp)*(Tn+Fn));
Row = Row + 1;
end
% Saving results as a table
Accuracy_Metrics = array2table(Accuracy_Metrics,'VariableNames',{'Cost_2_1' 'Tp' 'Fn'...'
'Fp' 'Tn' 'Loss_Classification_error' 'Accuracy' 'Precision' 'Recall' 'MCC'});
writetable(Accuracy_Metrics, 'Output directory\output file name.txt');

%% Calculating the classification accuracy metrics for the extent of oversampling and
%% misclassification cost; 'i' for the number of increased samples, 'j' for the
%% misclassification cost. We have used SMOTE (Synthetic Minority Over-sampling Technique) for
%% generation of synthetic samples. Each iteration of 'i' produces 2500 new samples using
%% the feature space between the 2500 random selected samples (without replacement) and
%% their nearest neighbours

Row = 1;
Accuracy_Metrics = zeros(28,11);
Oversampling_rate = 2500;
Class_2_matrix = table2array(Class_2);
for i = 1:4
    % Random sample selection from class 2 (saline) without replacement and copying into a
    % new matrix(named matrix)
    y = randsample(size(Class_2_matrix,1),Oversampling_rate);
    matrix = Class_2_matrix(y,:);
    z = 1;
    % 'inc' is the number of synthetic samples which will be made in the feature space between
    % the two nearest neighbours
    inc = 1;
    % Augmented matrix is the matrix of new generated samples
    Augmented_matrix = zeros(size(matrix,1)*inc,44);
    for ii = 1:size(matrix,1)
        % Finding the nearest neighbours of each query row of the selected matrix of samples
        % in Class 2 (saline)
        Index = knnsearch(Class_2_matrix,matrix(ii,:),'K',2);
        % Generation of samples between the two nearest neighbours using proposed
        % interpolation method in SMOTE
        for jj = z:inc + (z-1)
            Augmented_matrix(jj,1:2) =
                Class_2_matrix(ii,1:2)+rand*(Class_2_matrix(Index(1,2),1:2)-...
                Class_2_matrix(ii,1:2));
            % The target variable was the third column in the training set
            Augmented_matrix(jj,3) = 2;
            Augmented_matrix(jj,4:end) = ...
                Class_2_matrix(ii,4:end)+rand*(Class_2_matrix(Index(1,2),4:end)-...
                Class_2_matrix(ii,4:end));
            % Categorical variables of the generated sample are the same as the original
            % sample (not eligible for interpolation)
            Augmented_matrix(jj,20) = Class_2_matrix(Index(1,2),20);
            Augmented_matrix(jj,21) = Class_2_matrix(Index(1,2),21);
            Augmented_matrix(jj,44) = Class_2_matrix(Index(1,2),44);
        end
        z = jj+1;
    end
    % Converting the augmented matrix to a table
    Augmented_matrix = array2table(Augmented_matrix,'VariableNames',...
    {'upper_dept' 'lower_dept' 'ECe' 'Elevation' 'Pla_cur' 'Pro_cur' 'Slope' ...
    'Slope_Leng' 'TRI' 'c3ann' 'c3per' 'WTD' 'Aspect' 'Topo_index' 'Clay' 'Silt' ...
    'Sand' 'Soil_thick' 'Root_D' 'WRB' 'Main_litho' 'dtr' 'Pre' 'T_ave' 'T_max' 'T_min' ...
    'S_mo' 'PDSI' 'Sat_SM' 'Gleam_S' 'EVI' 'NDVI' 'FAPAR' 'LAI' 'Wind_S' 'Skin_T' ...
    'S_T_1' 'S_T_2' 'S_T_3' 'S_T_4' 'Pet' 'Def' 'aet' 'LC'});
    Augmented_matrix.Main_litho = categorical(Augmented_matrix.Main_litho);
    Augmented_matrix.WRB = categorical(Augmented_matrix.WRB);
    Augmented_matrix.LC = categorical(Augmented_matrix.LC);
    % Adding the augmented matrix to the original training set
    if i == 1
        Old_Augmented_matrix = [];
    end
end

```

```

Tbl = [Training;Old_Augmented_matrix;Augmented_matrix];
% To keep the previous generated samples in the next iteration:
Old_Augmented_matrix = [Old_Augmented_matrix;Augmented_matrix];
for j = 1:0.5:4
    % Each iteration of 'j' examines the effect of misclassification cost
    % of the class with lower number of samples on the performance of
    % the fitted model
    ens = fitcensemble(Tbl, 'ECe', 'Cost', [0 1; i 0], 'OptimizeHyperparameters', ...
{'Method', 'LearnRate', 'NumLearningCycles', 'MinLeafSize', 'MaxNumSplits', ...
'NumVariablesToSample', 'SplitCriterion'}, 'HyperparameterOptimisationOptions', ...
struct('Holdout', .25, 'UseParallel', true, 'MaxObjectiveEvaluations', 130, ...
'Repartition', true, 'ShowPlots', false, 'Verbose', 0));
    %% Obtaining the validation metrics
    Predictedlabels = predict(ens, Test);
    C = confusionmat(TrueLabels, Predictedlabels); Tp = C(1,1); Fn = C(1,2); Fp = C(2,1);
    Tn = C(2,2);
    Accuracy_Metrics(Row,1) = i*Oversampling_rate;
    Accuracy_Metrics(Row,2) = j;
    Accuracy_Metrics(Row,3) = Tp; Accuracy_Metrics(Row,4) = Fn;
    Accuracy_Metrics(Row,5) = Fp; Accuracy_Metrics(Row,6) = Tn;
    Accuracy_Metrics(Row,7) = loss(ens, Test, 'ECe');
    Accuracy_Metrics(Row,8) = (Tp+Tn)/(Tp+Fp+Fn+Tn)*100;
    Accuracy_Metrics(Row,9) = Tp/(Tp+Fp);
    Accuracy_Metrics(Row,10) = Tp/(Tp+Fn);
    Accuracy_Metrics(Row,11) = ((Tp*Tn)-(Fp*Fn))/sqrt((Tp+Fp)*(Tp+Fn)*(Tn+Fp)*(Tn+Fn));
    Row = Row + 1;
end
end
% Saving the results as a table
Accuracy_Metrics = array2table(Accuracy_Metrics, 'VariableNames', ...
{'Augmented_samples_Num' 'Cost_2_1' 'Tp' 'Fn' 'Fp' 'Tn' ...
'Loss_Classification_error' 'Accuracy' 'Precision' 'Recall' 'MCC'});
writetable(Accuracy_Metrics, 'Output directory\output file name.txt');

%% Calculating the classification accuracy metrics for different under-sampling rates and
%% misclassification cost. 'i' the number of decreased samples, 'j' for the misclassification
%% cost, under-sampling rate is 2500 samples in each iteration

Row = 1;
Accuracy_Metrics = zeros(28,11);
Undersampling_rate = 2500;
for i = 1:4
    % Random undersampling without replacement
    Class_1(randsample(height(Class_1), Undersampling_rate), :) = [];
    Tbl = [Class_1; Class_2];
    Tbl.Main_litho = categorical(Tbl.Main_litho);
    Tbl.WRB = categorical(Tbl.WRB);
    Tbl.LC = categorical(Tbl.LC);
    for j = 1:0.5:4
        ens = fitcensemble(Tbl, 'ECe', 'Cost', [0 1; j 0], 'OptimizeHyperparameters', ...
{'Method', 'LearnRate', 'NumLearningCycles', 'MinLeafSize', 'MaxNumSplits', 'NumVariablesToSample',
'SplitCriterion'}, 'HyperparameterOptimisationOptions', ...
struct('Holdout', .25, 'UseParallel', true, 'MaxObjectiveEvaluations', 130, 'Repartition', true, 'Show
Plots', false, 'Verbose', 0));
        %% Obtaining validation metrics
        Predictedlabels = predict(ens, Test);
        C = confusionmat(TrueLabels, Predictedlabels); Tp = C(1,1); Fn = C(1,2); Fp = C(2,1);
        Tn = C(2,2);
        Accuracy_Metrics(Row,1) = i*Undersampling_rate;
        Accuracy_Metrics(Row,2) = j;
        Accuracy_Metrics(Row,3) = Tp; Accuracy_Metrics(Row,4) = Fn;
        Accuracy_Metrics(Row,5) = Fp; Accuracy_Metrics(Row,6) = Tn;
        Accuracy_Metrics(Row,7) = loss(ens, Test, 'ECe');
        Accuracy_Metrics(Row,8) = (Tp+Tn)/(Tp+Fp+Fn+Tn)*100;
        Accuracy_Metrics(Row,9) = Tp/(Tp+Fp);
        Accuracy_Metrics(Row,10) = Tp/(Tp+Fn);
        Accuracy_Metrics(Row,11) = ((Tp*Tn)-(Fp*Fn))/sqrt((Tp+Fp)*(Tp+Fn)*(Tn+Fp)*(Tn+Fn));
        Row = Row + 1;
    end
end
end
Accuracy_Metrics = array2table(Accuracy_Metrics, 'VariableNames', {'Removed_samples_Num'
'Cost_2_1' 'Tp' 'Fn' 'Fp' 'Tn' ...
'Loss_Classification_error' 'Accuracy' 'Precision' 'Recall' 'MCC'});
writetable(Accuracy_Metrics, 'Output directory\output file name.txt');

%% Calculating the classification accuracy metrics for combined under-sampling and over-
%% sampling and misclassification cost change. 'i' for the iteration of decreased and

```

```

%% increased samples,'j' for misclassification cost, under-sampling rate is 1500 samples in
%% each iteration. Oversampling rate is 1500 for each iteration

Row = 1;
Accuracy_Metrics = zeros(36,12);
Oversampling_rate = 1500;
Class_2_matrix = table2array(Class_2);
Undersampling_rate = 1500;
for i = 1:4
    % Random oversampling with replacement
    y = randsample(size(Class_2_matrix,1),Oversampling_rate);
    matrix = Class_2_matrix(y,:);
    z = 1;
    inc = 1;
    Augmented_matrix = zeros(size(matrix,1)*inc,44);
    for ii = 1:size(matrix,1)
        Index = knnsearch(Class_2_matrix,matrix(ii,:), 'K',2);
        for jj = z:inc + (z-1)
            Augmented_matrix(jj,1:2) = ...
                Class_2_matrix(ii,1:2)+rand*(Class_2_matrix(Index(1,2),1:2)- ...
                Class_2_matrix(ii,1:2));
            Augmented_matrix(jj,3) = 2;
            Augmented_matrix(jj,4:end) = ...
                Class_2_matrix(ii,4:end)+rand*(Class_2_matrix(Index(1,2),4:end)- ...
                Class_2_matrix(ii,4:end));
            Augmented_matrix(jj,20) = Class_2_matrix(Index(1,2),20);
            Augmented_matrix(jj,21) = Class_2_matrix(Index(1,2),21);
            Augmented_matrix(jj,44) = Class_2_matrix(Index(1,2),44);
        end
        z = jj+1;
    end
    Augmented_matrix = array2table(Augmented_matrix,'VariableNames',...
    {'upper_dept' 'lower_dept' 'ECe' 'Elevation' 'Pla_cur' 'Pro_cur' 'Slope' ...
    'Slope_Leng' 'TRI' 'c3ann' 'c3per' 'WTD' 'Aspect' 'Topo_index' 'Clay' 'Silt' ...
    'Sand' 'Soil_thick' 'Root_D' 'WRB' 'Main_litho' 'dtr' 'Pre' 'T_ave' 'T_max' 'T_min' ...
    'S_mo' 'PDSI' 'Sat_SM' 'Gleam_S' 'EVI' 'NDVI' 'FAPAR' 'LAI' 'Wind_S' 'Skin_T' ...
    'S_T_1' 'S_T_2' 'S_T_3' 'S_T_4' 'Pet' 'Def' 'aet' 'LC'});
    % Random under-sampling without replacement
    Class_1_refilled(randsample(height(Class_1_refilled),Undersampling_rate),:) = [];
    if i == 1
        Old_Augmented_matrix = [];
    end
    Tbl = [Class_1_refilled;Class_2;Old_Augmented_matrix;Augmented_matrix];
    Tbl.Main_litho = categorical(Tbl.Main_litho);
    Tbl.WRB = categorical(Tbl.WRB);
    Tbl.LC = categorical(Tbl.LC);
    Old_Augmented_matrix = [Old_Augmented_matrix;Augmented_matrix];
    for j = 1:0.5:5
        ens = fitcensemble(Tbl,'ECe','Cost',[0 1;j 0],'OptimizeHyperparameters',...
        {'Method','LearnRate','NumLearningCycles','MinLeafSize','MaxNumSplits','NumVariablesToSample',
        'SplitCriterion'},'HyperparameterOptimisationOptions',...
        struct('Holdout',.25,'UseParallel',true,'MaxObjectiveEvaluations',130,'Repartition',true,'Show
        Plots',false,'Verbose',0));
        %% Obtaining validation metrics
        Predictedlabels = predict(ens,Test);
        C = confusionmat(TrueLabels,Predictedlabels); Tp = C(1,1); Fn = C(1,2); Fp = C(2,1);
        Tn = C(2,2);
        Accuracy_Metrics(Row,1) = i*Undersampling_rate;
        Accuracy_Metrics(Row,2) = i*Oversampling_rate;
        Accuracy_Metrics(Row,3) = j;
        Accuracy_Metrics(Row,4) = Tp; Accuracy_Metrics(Row,5) = Fn;
        Accuracy_Metrics(Row,6) = Fp; Accuracy_Metrics(Row,7) = Tn;
        Accuracy_Metrics(Row,8) = loss(ens,Test,'ECe');
        Accuracy_Metrics(Row,9) = (Tp+Tn)/(Tp+Fp+Fn+Tn)*100;
        Accuracy_Metrics(Row,10) = Tp/(Tp+Fp);
        Accuracy_Metrics(Row,11) = Tp/(Tp+Fn);
        Accuracy_Metrics(Row,12) = ((Tp*Tn)-(Fp*Fn))/sqrt((Tp+Fp)*(Tp+Fn)*(Tn+Fp)*(Tn+Fn));
        Row = Row + 1;
    end
end
end
% Saving results as a table
Accuracy_Metrics = array2table(Accuracy_Metrics,'VariableNames',{'Removed_samples_Num'
'Augmented_samples_Num' 'Cost_2_1' 'Tp' 'Fn' 'Fp' 'Tn'...
'Loss_Classification_error' 'Accuracy' 'Precision' 'Recall' 'MCC'});
writetable(Accuracy_Metrics, 'Output directory\output file name.txt');

```



The results (Table S25 to Table S28) showed that none of the imbalance handling techniques were effective in improving the performance of the final fitted binary classification. Thus, we just set the misclassification cost of the minority (or saline class) to be two since the number of samples in the saline class were half of the non-saline class.

**Table S25: Effect of variation of the misclassification cost on performance of the binary classifier for saline/non-saline classification task.**

| Misclassification cost | $T_p^a$ | $F_n^b$ | $F_p^c$ | $T_n^d$ | Classification error | Accuracy (%) | Precision | Recall | $MCC^e$ |
|------------------------|---------|---------|---------|---------|----------------------|--------------|-----------|--------|---------|
| 1.00                   | 6,580   | 579     | 775     | 2,812   | 0.126                | 87.40        | 0.895     | 0.919  | 0.713   |
| 1.25                   | 6,512   | 647     | 816     | 2,771   | 0.143                | 86.39        | 0.889     | 0.910  | 0.691   |
| 1.50                   | 6,450   | 709     | 725     | 2,862   | 0.143                | 86.66        | 0.899     | 0.901  | 0.700   |
| 1.75                   | 6,526   | 633     | 618     | 2,969   | 0.128                | 88.36        | 0.913     | 0.912  | 0.739   |
| 2.00                   | 6,579   | 580     | 739     | 2,848   | 0.144                | 87.73        | 0.899     | 0.919  | 0.721   |
| 2.25                   | 6,426   | 733     | 496     | 3,091   | 0.121                | 88.56        | 0.928     | 0.898  | 0.748   |
| 2.50                   | 6,244   | 915     | 450     | 3,137   | 0.126                | 87.30        | 0.933     | 0.872  | 0.727   |
| 2.75                   | 5,964   | 1,195   | 433     | 3,154   | 0.140                | 84.85        | 0.932     | 0.833  | 0.684   |
| 3.00                   | 6,539   | 620     | 636     | 2,951   | 0.141                | 88.31        | 0.911     | 0.913  | 0.737   |
| 3.25                   | 6,470   | 689     | 591     | 2,996   | 0.139                | 88.09        | 0.916     | 0.904  | 0.734   |
| 3.50                   | 6,152   | 1,007   | 489     | 3,098   | 0.138                | 86.08        | 0.926     | 0.859  | 0.702   |
| 3.75                   | 6,199   | 960     | 480     | 3,107   | 0.134                | 86.60        | 0.928     | 0.866  | 0.712   |
| 4.00                   | 6,482   | 677     | 659     | 2,928   | 0.154                | 87.57        | 0.908     | 0.905  | 0.721   |

<sup>a</sup> True positive

<sup>b</sup> False negative

<sup>c</sup> False positive

<sup>d</sup> True negative

<sup>e</sup> Matthews Correlation Coefficient

**Table S26: Effect of over-sampling of the under-represented class (saline class) using SMOTE technique and variation of the misclassification cost on performance of the binary classifier for saline/non-saline classification task.**

| Number of augmented samples | Misclassification cost | $T_p$ | $F_n$ | $F_p$ | $T_n$ | Classification error | Accuracy (%) | Precision | Recall | $MCC$ |
|-----------------------------|------------------------|-------|-------|-------|-------|----------------------|--------------|-----------|--------|-------|
| 2,500                       | 1.00                   | 6,341 | 818   | 762   | 2,825 | 0.152                | 85.30        | 0.893     | 0.886  | 0.671 |
| 2,500                       | 1.50                   | 5,990 | 1,169 | 766   | 2,821 | 0.187                | 81.99        | 0.887     | 0.837  | 0.608 |
| 2,500                       | 2.00                   | 6,271 | 888   | 449   | 3,138 | 0.125                | 87.56        | 0.933     | 0.876  | 0.731 |
| 2,500                       | 2.50                   | 5,990 | 1,169 | 381   | 3,206 | 0.129                | 85.58        | 0.940     | 0.837  | 0.701 |
| 2,500                       | 3.00                   | 6,365 | 794   | 518   | 3,069 | 0.133                | 87.79        | 0.925     | 0.889  | 0.732 |
| 2,500                       | 3.50                   | 5,916 | 1,243 | 340   | 3,247 | 0.120                | 85.27        | 0.946     | 0.826  | 0.699 |
| 2,500                       | 4.00                   | 5,644 | 1,515 | 289   | 3,298 | 0.118                | 83.21        | 0.951     | 0.788  | 0.671 |
| 5,000                       | 1.00                   | 6,494 | 665   | 675   | 2,912 | 0.133                | 87.53        | 0.906     | 0.907  | 0.719 |
| 5,000                       | 1.50                   | 6,446 | 713   | 638   | 2,949 | 0.141                | 87.43        | 0.910     | 0.900  | 0.719 |
| 5,000                       | 2.00                   | 6,430 | 729   | 572   | 3,015 | 0.136                | 87.89        | 0.918     | 0.898  | 0.731 |
| 5,000                       | 2.50                   | 6,062 | 1,097 | 396   | 3,191 | 0.126                | 86.11        | 0.939     | 0.847  | 0.709 |
| 5,000                       | 3.00                   | 6,458 | 701   | 629   | 2,958 | 0.151                | 87.62        | 0.911     | 0.902  | 0.723 |
| 5,000                       | 3.50                   | 6,300 | 859   | 538   | 3,049 | 0.142                | 87.00        | 0.921     | 0.880  | 0.716 |
| 5,000                       | 4.00                   | 6,348 | 811   | 666   | 2,921 | 0.167                | 86.26        | 0.905     | 0.887  | 0.694 |
| 7,500                       | 1.00                   | 6,517 | 642   | 689   | 2,898 | 0.137                | 87.61        | 0.904     | 0.910  | 0.721 |
| 7,500                       | 1.50                   | 6,403 | 756   | 575   | 3,012 | 0.136                | 87.61        | 0.918     | 0.894  | 0.725 |
| 7,500                       | 2.00                   | 6,311 | 848   | 687   | 2,900 | 0.164                | 85.72        | 0.902     | 0.882  | 0.683 |
| 7,500                       | 2.50                   | 5,863 | 1,296 | 468   | 3,119 | 0.147                | 83.58        | 0.926     | 0.819  | 0.660 |
| 7,500                       | 3.00                   | 6,281 | 878   | 578   | 3,009 | 0.150                | 86.45        | 0.916     | 0.877  | 0.703 |
| 7,500                       | 3.50                   | 6,377 | 782   | 586   | 3,001 | 0.150                | 87.27        | 0.916     | 0.891  | 0.718 |
| 7,500                       | 4.00                   | 6,357 | 802   | 523   | 3,064 | 0.138                | 87.67        | 0.924     | 0.888  | 0.729 |
| 10,000                      | 1.00                   | 6,486 | 673   | 701   | 2,886 | 0.144                | 87.21        | 0.902     | 0.906  | 0.712 |
| 10,000                      | 1.50                   | 6,299 | 860   | 579   | 3,008 | 0.145                | 86.61        | 0.916     | 0.880  | 0.706 |
| 10,000                      | 2.00                   | 6,250 | 909   | 827   | 2,760 | 0.195                | 83.85        | 0.883     | 0.873  | 0.639 |
| 10,000                      | 2.50                   | 5,891 | 1,268 | 400   | 3,187 | 0.131                | 84.48        | 0.936     | 0.823  | 0.681 |
| 10,000                      | 3.00                   | 5,740 | 1,419 | 354   | 3,233 | 0.124                | 83.50        | 0.942     | 0.802  | 0.669 |
| 10,000                      | 3.50                   | 5,355 | 1,804 | 281   | 3,306 | 0.118                | 80.60        | 0.950     | 0.748  | 0.632 |
| 10,000                      | 4.00                   | 5,676 | 1,483 | 389   | 3,198 | 0.129                | 82.58        | 0.936     | 0.793  | 0.651 |

**Table S27: Effect of random under-sampling from the under-represented class (saline class) and variation of the misclassification cost on performance of the binary classifier for saline/non-saline classification task.**

| Number of removed samples | Misclassification cost | $T_p$ | $F_n$ | $F_p$ | $T_n$ | Classification error | Accuracy (%) | Precision | Recall | $MCC$ |
|---------------------------|------------------------|-------|-------|-------|-------|----------------------|--------------|-----------|--------|-------|
| 2,500                     | 1.00                   | 6,592 | 566   | 692   | 2,896 | 0.120                | 88.29        | 0.905     | 0.921  | 0.735 |
| 2,500                     | 1.50                   | 6,381 | 777   | 555   | 3,033 | 0.130                | 87.60        | 0.920     | 0.891  | 0.726 |
| 2,500                     | 2.00                   | 6,186 | 972   | 478   | 3,110 | 0.134                | 86.51        | 0.928     | 0.864  | 0.710 |
| 2,500                     | 2.50                   | 5,629 | 1,529 | 616   | 2,972 | 0.189                | 80.04        | 0.901     | 0.786  | 0.588 |
| 2,500                     | 3.00                   | 6,107 | 1,051 | 451   | 3,137 | 0.134                | 86.02        | 0.931     | 0.853  | 0.703 |
| 2,500                     | 3.50                   | 5,226 | 1,932 | 267   | 3,321 | 0.140                | 79.54        | 0.951     | 0.730  | 0.619 |
| 2,500                     | 4.00                   | 6,505 | 653   | 584   | 3,004 | 0.141                | 88.49        | 0.918     | 0.909  | 0.743 |
| 5,000                     | 1.00                   | 6,436 | 722   | 633   | 2,955 | 0.131                | 87.39        | 0.910     | 0.899  | 0.718 |
| 5,000                     | 1.50                   | 5,859 | 1,299 | 674   | 2,914 | 0.185                | 81.64        | 0.897     | 0.819  | 0.609 |
| 5,000                     | 2.00                   | 6,037 | 1,121 | 394   | 3,194 | 0.130                | 85.90        | 0.939     | 0.843  | 0.706 |
| 5,000                     | 2.50                   | 6,260 | 898   | 527   | 3,061 | 0.139                | 86.74        | 0.922     | 0.875  | 0.711 |
| 5,000                     | 3.00                   | 6,073 | 1,085 | 467   | 3,121 | 0.137                | 85.56        | 0.929     | 0.848  | 0.694 |
| 5,000                     | 3.50                   | 6,260 | 898   | 544   | 3,044 | 0.144                | 86.58        | 0.920     | 0.875  | 0.707 |
| 5,000                     | 4.00                   | 6,197 | 961   | 443   | 3,145 | 0.126                | 86.93        | 0.933     | 0.866  | 0.720 |
| 7,500                     | 1.00                   | 6,256 | 902   | 499   | 3,089 | 0.132                | 86.96        | 0.926     | 0.874  | 0.717 |
| 7,500                     | 1.50                   | 6,050 | 1,108 | 479   | 3,109 | 0.143                | 85.23        | 0.927     | 0.845  | 0.687 |
| 7,500                     | 2.00                   | 5,644 | 1,514 | 431   | 3,157 | 0.156                | 81.90        | 0.929     | 0.788  | 0.636 |
| 7,500                     | 2.50                   | 6,155 | 1,003 | 473   | 3,115 | 0.135                | 86.26        | 0.929     | 0.860  | 0.706 |
| 7,500                     | 3.00                   | 5,623 | 1,535 | 582   | 3,006 | 0.178                | 80.30        | 0.906     | 0.786  | 0.595 |
| 7,500                     | 3.50                   | 5,115 | 2,043 | 261   | 3,327 | 0.130                | 78.56        | 0.951     | 0.715  | 0.605 |
| 7,500                     | 4.00                   | 5,285 | 1,873 | 232   | 3,356 | 0.113                | 80.41        | 0.958     | 0.738  | 0.636 |
| 10,000                    | 1.00                   | 6,006 | 1,152 | 502   | 3,086 | 0.151                | 84.61        | 0.923     | 0.839  | 0.675 |
| 10,000                    | 1.50                   | 5,722 | 1,436 | 402   | 3,186 | 0.149                | 82.90        | 0.934     | 0.799  | 0.655 |
| 10,000                    | 2.00                   | 5,989 | 1,169 | 454   | 3,134 | 0.139                | 84.90        | 0.930     | 0.837  | 0.684 |
| 10,000                    | 2.50                   | 5,279 | 1,879 | 256   | 3,332 | 0.129                | 80.13        | 0.954     | 0.737  | 0.629 |
| 10,000                    | 3.00                   | 5,194 | 1,964 | 247   | 3,341 | 0.123                | 79.42        | 0.955     | 0.726  | 0.620 |
| 10,000                    | 3.50                   | 5,713 | 1,445 | 322   | 3,266 | 0.116                | 83.56        | 0.947     | 0.798  | 0.673 |
| 10,000                    | 4.00                   | 6,034 | 1,124 | 491   | 3,097 | 0.141                | 84.97        | 0.925     | 0.843  | 0.682 |

**Table S28: Effect of combined random under-sampling and over-sampling (using SMOTE technique) and variation of the misclassification cost on performance of the binary classifier for saline/non-saline classification task.**

| Number of removed samples | Number of augmented samples | Misclassification cost | $T_p$ | $F_n$ | $F_p$ | $T_n$ | Classification error | Accuracy (%) | Precision | Recall | MCC   |
|---------------------------|-----------------------------|------------------------|-------|-------|-------|-------|----------------------|--------------|-----------|--------|-------|
| 1,500                     | 1,500                       | 1.00                   | 6,521 | 637   | 610   | 2,978 | 0.120                | 88.40        | 0.914     | 0.911  | 0.740 |
| 1,500                     | 1,500                       | 1.50                   | 6,267 | 891   | 571   | 3,017 | 0.141                | 86.39        | 0.916     | 0.876  | 0.702 |
| 1,500                     | 1,500                       | 2.00                   | 5,914 | 1,244 | 468   | 3,120 | 0.150                | 84.07        | 0.927     | 0.826  | 0.668 |
| 1,500                     | 1,500                       | 2.50                   | 5,942 | 1,216 | 453   | 3,135 | 0.143                | 84.47        | 0.929     | 0.830  | 0.676 |
| 1,500                     | 1,500                       | 3.00                   | 6,144 | 1,014 | 452   | 3,136 | 0.131                | 86.36        | 0.931     | 0.858  | 0.709 |
| 1,500                     | 1,500                       | 3.50                   | 5,584 | 1,574 | 574   | 3,014 | 0.179                | 80.01        | 0.907     | 0.780  | 0.591 |
| 1,500                     | 1,500                       | 4.00                   | 6,256 | 902   | 433   | 3,155 | 0.122                | 87.58        | 0.935     | 0.874  | 0.733 |
| 1,500                     | 1,500                       | 4.50                   | 6,299 | 859   | 493   | 3,095 | 0.133                | 87.42        | 0.927     | 0.880  | 0.726 |
| 1,500                     | 1,500                       | 5.00                   | 6,147 | 1,011 | 484   | 3,104 | 0.136                | 86.09        | 0.927     | 0.859  | 0.702 |
| 3,000                     | 3,000                       | 1.00                   | 6,387 | 771   | 677   | 2,911 | 0.142                | 86.53        | 0.904     | 0.892  | 0.699 |
| 3,000                     | 3,000                       | 1.50                   | 6,157 | 1,001 | 562   | 3,026 | 0.149                | 85.46        | 0.916     | 0.860  | 0.685 |
| 3,000                     | 3,000                       | 2.00                   | 6,100 | 1,058 | 534   | 3,054 | 0.148                | 85.19        | 0.920     | 0.852  | 0.682 |
| 3,000                     | 3,000                       | 2.50                   | 5,761 | 1,397 | 390   | 3,198 | 0.139                | 83.37        | 0.937     | 0.805  | 0.664 |
| 3,000                     | 3,000                       | 3.00                   | 5,449 | 1,709 | 290   | 3,298 | 0.130                | 81.40        | 0.949     | 0.761  | 0.643 |
| 3,000                     | 3,000                       | 3.50                   | 5,551 | 1,607 | 323   | 3,265 | 0.127                | 82.04        | 0.945     | 0.775  | 0.649 |
| 3,000                     | 3,000                       | 4.00                   | 5,703 | 1,455 | 591   | 2,997 | 0.174                | 80.96        | 0.906     | 0.797  | 0.605 |
| 3,000                     | 3,000                       | 4.50                   | 5,544 | 1,614 | 340   | 3,248 | 0.125                | 81.82        | 0.942     | 0.775  | 0.644 |
| 3,000                     | 3,000                       | 5.00                   | 6,145 | 1,013 | 540   | 3,048 | 0.149                | 85.55        | 0.919     | 0.858  | 0.689 |
| 4,500                     | 4,500                       | 1.00                   | 6,299 | 859   | 551   | 3,037 | 0.136                | 86.88        | 0.920     | 0.880  | 0.713 |
| 4,500                     | 4,500                       | 1.50                   | 6,081 | 1,077 | 471   | 3,117 | 0.139                | 85.59        | 0.928     | 0.850  | 0.694 |
| 4,500                     | 4,500                       | 2.00                   | 6,057 | 1,101 | 592   | 2,996 | 0.161                | 84.25        | 0.911     | 0.846  | 0.661 |
| 4,500                     | 4,500                       | 2.50                   | 5,355 | 1,803 | 313   | 3,275 | 0.138                | 80.31        | 0.945     | 0.748  | 0.624 |
| 4,500                     | 4,500                       | 3.00                   | 6,029 | 1,129 | 411   | 3,177 | 0.126                | 85.67        | 0.936     | 0.842  | 0.700 |
| 4,500                     | 4,500                       | 3.50                   | 5,372 | 1,786 | 309   | 3,279 | 0.126                | 80.50        | 0.946     | 0.750  | 0.628 |
| 4,500                     | 4,500                       | 4.00                   | 6,155 | 1,003 | 554   | 3,034 | 0.151                | 85.51        | 0.917     | 0.860  | 0.687 |
| 4,500                     | 4,500                       | 4.50                   | 6,006 | 1,152 | 630   | 2,958 | 0.173                | 83.42        | 0.905     | 0.839  | 0.644 |
| 4,500                     | 4,500                       | 5.00                   | 6,069 | 1,089 | 484   | 3,104 | 0.138                | 85.36        | 0.926     | 0.848  | 0.689 |
| 6,000                     | 6,000                       | 1.00                   | 6,214 | 944   | 543   | 3,045 | 0.142                | 86.16        | 0.920     | 0.868  | 0.700 |
| 6,000                     | 6,000                       | 1.50                   | 5,702 | 1,456 | 470   | 3,118 | 0.159                | 82.08        | 0.924     | 0.797  | 0.635 |
| 6,000                     | 6,000                       | 2.00                   | 5,631 | 1,527 | 366   | 3,222 | 0.137                | 82.38        | 0.939     | 0.787  | 0.650 |
| 6,000                     | 6,000                       | 2.50                   | 5,361 | 1,797 | 331   | 3,257 | 0.135                | 80.20        | 0.942     | 0.749  | 0.620 |
| 6,000                     | 6,000                       | 3.00                   | 6,108 | 1,050 | 559   | 3,029 | 0.154                | 85.03        | 0.916     | 0.853  | 0.678 |
| 6,000                     | 6,000                       | 3.50                   | 5,021 | 2,137 | 234   | 3,354 | 0.114                | 77.94        | 0.955     | 0.701  | 0.600 |
| 6,000                     | 6,000                       | 4.00                   | 5,844 | 1,314 | 725   | 2,863 | 0.199                | 81.03        | 0.890     | 0.816  | 0.594 |
| 6,000                     | 6,000                       | 4.50                   | 6,079 | 1,079 | 604   | 2,984 | 0.165                | 84.34        | 0.910     | 0.849  | 0.662 |
| 6,000                     | 6,000                       | 5.00                   | 6,020 | 1,138 | 441   | 3,147 | 0.129                | 85.31        | 0.932     | 0.841  | 0.692 |

One of the challenges in fitting the classification and regression models to target variables was optimisation of the hyperparameters. A hyperparameter is a parameter whose value should be set before launching the training process of a machine learning model. To handle this during the model training, we used MATLAB hyperparameter optimizer which applies Bayesian optimisation algorithm to estimate the optimal hyperparameters. Since the Bayesian optimisation algorithm used for optimizing the objective function depends on the runtime (it avoids the areas with high run time in each iteration), results of the hyperparameter tuning jobs were not reproducible. Therefore, according to our computational resources we repeated the trainings 30 times and acquired confidence intervals for the mean of optimized hyperparameters using bootstrapping technique; we used bootstrapping because it was not possible to determine the exact distribution of optimized hyperparameters with only 30 iterations. We applied 10-fold cross validation to calculate the accuracy metrics for trained models and similarly the confidence intervals of mean was reported to show the performance of the models. The following MATLAB code was used to fit an ensemble of classification trees on training datasets, optimize hyperparameters, and bootstrapping the results to calculate 95% confidence intervals of the mean:

```

clc;
clear;
%% Training ensemble of regression trees for predicting ECe or ESP,
%% Usage: This script returns the tuned fitcensemble hyperparameters and
%% accuracy metrics calculated on the holdout set for 30 iterations using fitcensemble
%% function in order to calculate the confidence intervals using bootstrapping technique.
%% Due to non-repeatable nature of the hyperparameter optimisation jobs, training
%% jobs are repeated 30 times and using bootstrapping, 95% confidence intervals for
%% hyperparameters and accuracy metrics are calculated. Accuracy metrics include: Binomial
%% deviance loss, Misclassification error, Accuracy, Precision, Recall, and MCC (Matthews
%% Correlation Coefficient, useful for binary imbalanced classification).

%% Classification using ensemble of trees (fitcensemble)
% Here ECe is the target variable; however for ESP, all ECe values should be replaced by ESP

% Importing the original dataset
ECe = readtable(Location of the training datasets', 'FileType', ...
    'text', 'Delimiter', ',', 'PreserveVariableNames', true);

% Pre-processing the original dataset
table = standardizeMissing(ECe, -9999);
table.FID = [];
table.Year = [];
table(sum(ismissing(table), 2) > 0, :) = [];% Dropping the rows with missing values
% Categorizing the categorical variables in the training set
table.Main_litho = categorical(table.Main_litho);
table.WRB = categorical(table.WRB);
table.LC = categorical(table.LC);
% Classifying the ECe values
edges = [0 2 100]; % for ESP: edges = [0 1 100]
table.ECe = discretize(table.ECe, edges);

% Pre-allocating memory to variables with increasing size in each iteration
Num_learning_cycles = zeros(30,1); Learn_rate = zeros(30,1); Min_leaf_size = zeros(30,1);
Max_num_splits = zeros(30,1); Num_variables_to_sample = zeros(30,1); Binomial_deviance_loss =
zeros(30,1);
Mis_classification_error = zeros(30,1); Accuracy = zeros(30,1); Precision = zeros(30,1);
Recall = zeros(30,1); MCC = zeros(30,1); MinObjective = zeros(30,1);

% Training: This loop repeats the fitting of the classification model 30 times
for i = 1:30
    % We used holdout method with the maximum 130 objective function evaluations to
    % optimize the ensemble hyperparameters
    % 'ens' is the object of the final trained model
    % The misclassification cost for saline class is set to be 2
    % Note the misclassification cost matrix was the default for ESP training dataset
    ens = fitcensemble(table, ECe, 'Cost', [0 1; 2 0],
    'ScoreTransform', 'logit', 'Logit', 'OptimizeHyperparameters', ...
    {'Method', 'LearnRate', 'NumLearningCycles', 'MinLeafSize', 'MaxNumSplits', 'NumVariablesToSample',
    'SplitCriterion'}, 'HyperparameterOptimisationOptions', struct('Holdout', .25, 'UseParallel', true,
    'MaxObjectiveEvaluations', 130, 'ShowPlots', true, 'Repartition', true));

```

```

    % Saving the created model objects
    save(strcat('output_folder\ens_',num2str(i)), 'ens');
end
Truelabels = table.ECe;
% This loop cross-validates the fitted models using 10-fold cross validation technique
parfor i = 1:30
    % Loading the saved model objects
    ens = load(strcat('Output location from the previous loop\ens_',num2str(i)));
    % Acquiring hyperparameter tuning job results
    MinObjective(i,1) = ens.ens.HyperparameterOptimisationResults.MinObjective;
    Num_learning_cycles(i,1) = ...
table2array(ens.ens.HyperparameterOptimisationResults.XAtMinObjective(1,2));
    Learn_rate(i,1) = ...
table2array(ens.ens.HyperparameterOptimisationResults.XAtMinObjective(1,3));
    Min_leaf_size(i,1) = ...
table2array(ens.ens.HyperparameterOptimisationResults.XAtMinObjective(1,4));
    Max_num_splits(i,1) = ...
table2array(ens.ens.HyperparameterOptimisationResults.XAtMinObjective(1,5));
    Num_variables_to_sample(i,1) = ...
table2array(ens.ens.HyperparameterOptimisationResults.XAtMinObjective(1,7));
    % Validation and Acquiring accuracy metrics
    cvens = crossval(ens.ens, 'Kfold', 10);
    Predictedlabels = kfoldPredict(cvens);
    C = confusionmat(Truelabels, Predictedlabels);
    % Tp = True Positive, Fn = False Negative, Fp = False Positive, Tn = True Negative
    Tp = C(1,1); Fn = C(1,2); Fp = C(2,1); Tn = C(2,2);
    Binomial_deviance_loss(i,1) = kfoldLoss(cvens, 'Lossfun', 'binodeviance');
    Mis_classification_error(i,1) = kfoldLoss(cvens); % Binary misclassification loss
    Accuracy(i,1) = (Tp+Tn)/(Tp+Fp+Fn+Tn)*100; % Binary classification accuracy
    Precision(i,1) = Tp/(Tp+Fp); % Precision
    Recall(i,1) = Tp/(Tp+Fn); % Recall
    % MCC (Matthews Correlation Coefficient) for binary imbalanced classification
    MCC(i,1) = ((Tp*Tn)-(Fp*Fn))/sqrt((Tp+Fp)*(Tp+Fn)*(Tn+Fp)*(Tn+Fn));
end

% Exporting the output into a table
Statistics = [Num_learning_cycles Learn_rate Min_leaf_size Max_num_splits
Num_variables_to_sample Binomial_deviance_loss Mis_classification_error Accuracy Precision
Recall MCC MinObjective];
Statistics_table = array2table(Statistics, 'VariableNames', {'Num_learning_cycles'...
'Learn_rate' 'Min_leaf_size' 'Max_num_splits' 'Num_variables_to_sample'...
'Binomial_deviance_loss' 'Mis_classification_error' 'Accuracy' 'Precision'...
'Recall' 'MCC' 'MinObjective'});

% Saving the obtained statistics
writetable(Statistics_table, 'Output directory\output file name.txt');

%% Bootstrapping

% Computing the 95% confidence intervals of the mean for the statistics calculated in the
% above loop using 1000 bootstrap iterations. bootci creates each bootstrap sample by sampling
% with replacement from the rows of the data arguments and computes the confidence interval by
% bias corrected and accelerated percentile method

opt = statset('UseParallel', true);
ci = bootci(1000, {@nanmean, Statistics}, 'type', 'bca', 'Options', opt);
ci = array2table(ci, 'VariableNames', {'Num_learning_cycles' 'Learn_rate' 'Min_leaf_size'...
'Max_num_splits' 'Num_variables_to_sample' 'Binomial_deviance_loss'...
'Mis_classification_error' 'Accuracy' 'Precision' 'Recall' 'MCC' 'MinObjective'});

% Exporting the output into a table
writetable(ci, 'Output directory\output file name.txt');

```

Likewise, the following script in MATLAB was used to train an ensemble of regression trees (using MATLAB “fitensemble” function) on each class of training datasets, optimize function’s hyperparameters, and bootstrapping the results to calculate 95% confidence intervals of the mean for hyperparameters and accuracy metrics:

```

clc;
clear;
%% Fitting an ensemble of regression trees to each class,
% This script returns the tuned fitensemble hyperparameters and

```

```

% accuracy metrics calculated by 10-fold cross validation for 30 iterations using fitrensemble
% function and calculates the confidence intervals for hyperparameters using bootstrapping
% technique. Hyperparameters tuning job is conducted after log-transformation of the response
% variable. Accuracy metrics including mean squared error (mse), mean absolute error (mae),
% and NSE which is a specific definition of coefficient of determination (shown as R_squared in
% this script) are computed for both logarithmic and non-logarithmic spaces.

%% Regression using ensemble of trees (fitrensemble)
% Note this is regression using the ensemble of trees (fitrensemble) on ECe as
% a target variable and for ESP, all variables shown by ECe should be replaced by ESP

% Importing the original dataset
ECe = readtable('Training set file location','FileType',...
               'text','Delimiter',' ',' ','PreserveVariableNames',true);

% Pre-processing the original dataset
table = standardizeMissing(ECe,-9999);
table.FID = [];
table.Year = [];
table(sum(ismissing(table),2) > 0,:) = [];% Dropping the rows with missing values
% Classifying the table into two parts based on the values of target variable
edges = [0 2 100]; % edges = [0 1 100] for ESP
table.W = discretize(table.ECe,edges); % W would be 1 or 2 and is indicator of class
table = table(table.W(:) == 2,:); % Removing the first class (non-saline) to do the regression
% job on saline class; Similarly by setting table = table(table.W(:) == 1,:), second class
% (saline) can be removed and regression can be done on the remaining class
table.W = [];
table.ECe = log10(table.ECe); Transforming the target variable to logarithmic scale; for
% regression on the non-saline class, logarithm transformation of the values that
% are 0 (zero) is not possible. Therefore, first a constant
% (here one) should be added to the target variable values and then transform the target to
% the logarithmic scale (table.ECe = log10(table.ECe + 1))
% Categorizing the categorical variables in the training set
table.Main_litho = categorical(table.Main_litho);
table.WRB = categorical(table.WRB);
table.LC = categorical(table.LC);

% Pre-allocating memory to variables with increasing size in each iteration
Num_learning_cycles = zeros(30,1); Learn_rate = zeros(30,1); Min_leaf_size = zeros(30,1);
Max_num_splits = zeros(30,1); Num_variables_to_sample = zeros(30,1);
mse_log = zeros(30,1);mae_log = zeros(30,1); R_squared_log = zeros(30,1);
mse = zeros(30,1);mae = zeros(30,1);R_squared = zeros(30,1);MinObjective = zeros(30,1);

for i = 1:30
    % Training and hyperparameter tuning job
    % We used holdout method (25% held out) with 130 objective function evaluations to
    % optimize the ensemble hyperparameters
    % 'ens' is the object of the final trained model
    ens = fitrensemble(table,'ECe','Method','LSBoost','OptimizeHyperparameters',...
                      {'NumLearningCycles','LearnRate','MinLeafSize','MaxNumSplits','NumVariablesToSample'},...
                      'HyperparameterOptimisationOptions',struct('Holdout',.25,'UseParallel',true,...
                        'MaxObjectiveEvaluations',130,'Repartition',true,'ShowPlots',true,'Verbose',1));
    % Acquiring and saving the hyperparameter tuning job results on the disk
    save(strcat('Output directory\ens_',... num2str(i)),'ens');
end

% Validation and Acquiring accuracy metrics
ytrue_log = table.ECe;
% Back-transformation of the predicted values from logarithmic scale
ytrue = 10.^(table.ECe); % ytrue = 10.^(table.ECe)-1 for the non-saline class
% This loop cross-validates the fitted models using 10-fold cross validation
parfor i = 1:30
    % Loading the saved model objects
    ens =
        load(strcat('Output location from the previous loop\ens_'\ens_',...
                    num2str(i)));
    % Acquiring hyperparameter tuning job results
    MinObjective(i,1) = ens.ens.HyperparameterOptimisationResults.MinObjective;
    Num_learning_cycles(i,1) = ...
table2array(ens.ens.HyperparameterOptimisationResults.XAtMinObjective(1,1));
    Learn_rate(i,1) = ...
table2array(ens.ens.HyperparameterOptimisationResults.XAtMinObjective(1,2));
    Min_leaf_size(i,1) = ...
table2array(ens.ens.HyperparameterOptimisationResults.XAtMinObjective(1,3));
    Max_num_splits(i,1) = ...
table2array(ens.ens.HyperparameterOptimisationResults.XAtMinObjective(1,4));

```

```

    Num_variables_to_sample(i,1) = ...
table2array(ens.ens.HyperparameterOptimisationResults.XAtMinObjective(1,5));
% Validation of the trained ensembles using 10-fold cross validation
cvens = crossval(ens.ens,'Kfold',10);
mse_log(i,1) = kfoldLoss(cvens,'mode','average');% Mean square error in logarithmic scale
yfit_log = kfoldPredict(cvens);
mae_log(i,1) = mean(abs(yfit_log - ytrue_log));% Mean absolute error in logarithmic scale%
% NSE in the logarithmic scale
R_squared_log(i,1) = 1 - sum((ytrue_log - yfit_log).^2)/sum((ytrue_log - ...
mean(ytrue_log)).^2);
yfit = 10.^(yfit_log); % ytrue = 10.^(table.ECe)-1 for the non-saline class
mse(i,1) = mean((ytrue - yfit).^2); % Mean square error
mae(i,1) = mean(abs(yfit - ytrue)); % Mean absolute error
R_squared(i,1) = 1 - sum((ytrue - yfit).^2)/sum((ytrue - mean(ytrue)).^2);
% NSE
end
rmse_log = sqrt(mse_log);% Root mean square error in the logarithmic scale
rmse = sqrt(mse);% Root mean square error

% Exporting the output into a table
Statistics = [Num_learning_cycles Learn_rate Min_leaf_size Max_num_splits
Num_variables_to_sample mse_log rmse_log mae_log R_squared_log mse rmse mae R_squared
MinObjective];
Statistics_table = array2table(Statistics,'VariableNames',{'Num_learning_cycles' 'Learn_rate'
'Min_leaf_size' 'Max_num_splits' 'Num_variables_to_sample' 'mse_log' 'rmse_log'...
'mae_log' 'R_squared_log' 'mse' 'rmse' 'mae' 'R_squared' 'MinObjective'});

% Saving the table on the disk
writetable(Statistics_table, 'Output directory\output file name.txt');

%% Bootstrapping

% Computing the 95% confidence intervals of the mean for the statistics calculated in
% above loop using 1000 bootstrap iterations. bootci creates each bootstrap sample by sampling
% with replacement from the rows of the data arguments and computes the confidence interval by
% bias corrected and accelerated percentile method.
opt = statset('UseParallel',true);
ci = bootci(1000,{@nanmean,Statistics},'type','bca','Options',opt);
ci = array2table(ci,'VariableNames',{'Num_learning_cycles' 'Learn_rate' 'Min_leaf_size'...
'Max_num_splits' 'Num_variables_to_sample' 'mse_log' 'rmse_log'...
'mae_log' 'R_squared_log' 'mse' 'rmse' 'mae' 'R_squared' 'MinObjective'});

%Exporting the output into a table
writetable(ci, 'Output directory\output file name.txt');

```

For both classification and regression jobs, increasing the number of weak learners (number of learning cycles) did not improve the performance of the ensembles. Among trained classifiers, the one with highest *MCC* and among regressions within each class, the one with highest *NSE* were selected for the rest of analysis, which means a total of six models, two for classification and four for per-class regression jobs.

## 6.4 Generation of soil mask and spatio-temporal predictions

Through applying the trained models to a global soil mask, we created the global maps of surface soil salinity and sodicity (0 - 30 cm) at 0.008333333° spatial resolution. To create that soil mask, first we re-projected the 2014 MODIS land cover map from sinusoidal coordinates system to WGS 1984 using the ArcMap “raster project” tool. During the re-projection, we also resampled the map (with 0.004° spatial resolution) to 0.008333333° resolution (which was our desirable resolution) by the nearest neighbour resampling method to minimize the data loss during resampling and re-projection steps. Then we masked out the pixels labelled as water bodies, permanent wetlands, urban and built-up lands, and permanent snow and ice (numbers 11, 13, 15, and 17 in the map’s IGBP legend) using the “mask function” available in ArcMap image analysis window. During exporting the generated layer, the lower and upper extents were set to be -55 and 55, respectively. Using ArcMap “raster split tool”, we split the soil mask to smaller tiles so that the final smaller rasters were of maximum 3,600 pixels (60 rows and 60



columns). A total of 50,687 raster tiles were generated and converted to point feature classes in the World Mercator coordinates system using the following Python script:

```
## Raster to point conversion, we used PyCharm Python IDE (Integrated Development Environment)
## Usage: This code converts raster layers to point feature layers.

import arcpy # Importing the ArcPy module
import multiprocessing #Importing multi-processing module
from multiprocessing import Process
import os # Importing Miscellaneous operating system module required for reading the file
names in a directory
import os, fnmatch

# Setting the geo-processing environments
arcpy.env.overwriteOutput = True
arcpy.env.workspace = r"Directory of the raster tiles created form splitting job"
arcpy.env.extent = "MAXOF"
# Setting the output coordinates system as World Mercator
arcpy.env.geographicTransformations = arcpy.SpatialReference(54004)

# Reading all raster files in a directory
path = r" Directory of the raster tiles created form splitting job "
pattern = "*.tif"
Tiffs = [ff for ff in os.listdir(path) if fnmatch.fnmatch(ff, pattern)]

# Defining the function that will be passed to child processes
# Function arguments: ini, end
def cell(ini,end):
    jj = range(ini,end)# Indicator of the raster file
    for j in jj:
        inRaster = Tiffs[j]
        string = Tiffs[j]
        outPoint = "Output directory of point feature layers/"+string[0:4]+"_"+str(j)+".shp"
        field = "VALUE"
        # Execution of the ArcPy raster to point tool
        arcpy.RasterToPoint_conversion(inRaster, outPoint, field)

if __name__ == '__main__':
    count = 0
    processes = []
    for i in range(0,number of system cores):
        ini = count
        end = count + The number of rasters that should be converted by each core
        process = Process(target=cell, args=(ini,end,))
        processes.append(process)
        process.start()
        count = end
```

The output point feature classes were in the World Mercator coordinates system. The values of static predictors in the World Mercator coordinates system were then extracted to the points in the generated point feature classes as follows:

```
# Extracting static raster values to points in World Mercator coordinates system,
# Usage: Extracts the cells' values of multiple rasters as attributes in
# the output point feature classes. Requirements: Spatial Analyst Extension.

import arcpy # Importing the ArcPy module
from arcpy import env
from arcpy.sa import *
import multiprocessing #Importing multi-processing module
from multiprocessing import Process
import time
import os
import os, fnmatch

# Setting the geo-processing environments
arcpy.CheckOutExtension("Spatial")
arcpy.env.extent = "MAXOF"
arcpy.env.overwriteOutput = True
arcpy.env.workspace = r"Location of the point feature layers" # Raster layers must be in the
# same directory

# Reading all point feature layers in a directory
path = r" Location of the point feature layers "
```

```

pattern = "*.shp"
shape_files = [ff for ff in os.listdir(path) if fnmatch.fnmatch(ff, pattern)]

# Defining the function that will be passed to child processes
# Function arguments: ini, end
def cell(ini,end):
    jj = range(ini,end)
    for j in jj:
        # j is the indicator for shape files
        inRasterList = [{"Global_DEM.tif","Elevation"}, {"Global_Plan.tif", "Pla_cur"},
            {"Global_Profile.tif", "Pro_cur"}, {"Global_Slope.tif", "Slope"},
            {"Slope_Length.sdat", "Slope_Leng"}, {"Global_Terrain Ruggedness Index (TRI).sdat", "TRI"}]
        # The value of the cell will be calculated from the adjacent cells with
        # valid values using bilinear interpolation
        inPointFeatures = shape_files[j]
        ExtractMultiValuesToPoints(inPointFeatures, inRasterList, "BILINEAR")

if __name__ == '__main__':
    processes = []
    count = 0
    for i in range(0,number of system cores):
        # To do each child process in a different temporary folder:
        time.sleep(1.1)
        newTempDir = r"C:\temp\gptmpenvr_" + time.strftime('%Y%m%d%H%M%S') + str(i)
        os.mkdir(newTempDir)
        os.environ["TEMP"] = newTempDir
        os.environ["TMP"] = newTempDir
        ini = count
        end = count + The number of point features that should be processed by each core
        process = Process(target = cell, args = (ini,end,))
        processes.append(process)
        process.start()
        count = end

```

After extracting the static Mercator predictors' values, the point feature classes were again projected to the WGS 1984 coordinates system using the following Python script:

```

# Projecting point feature classes to WGS 1984 geographic coordinates.

import multiprocessing # Importing the ArcPy module
from multiprocessing import Process #Importing multi-processing module
import arcpy
import os
import os, fnmatch

# Setting the geo-processing environments
arcpy.env.workspace = r"Location of the point feature classes"

# Reading all point feature layers in a directory
path = r"Location of the point feature classes "
pattern = "*.shp"
shape_files = [ff for ff in os.listdir(path) if fnmatch.fnmatch(ff, pattern)]
# Setting the output coordinates system object (WGS 1984)
sr = arcpy.SpatialReference(4326)

# Defining the function that will be passed to child processes
# Function arguments: ini, end
def cell(ini,end):
    jj = range(ini,end)
    for j in jj:
        # j is the indicator for shape files
        string = shape_files[j]
        output_feature_class = r"Location of the projected point feature classes/"+string+".shp"
        arcpy.Project_management(shape_files[j], output_feature_class, sr)

if __name__ == '__main__':
    processes = []
    count = 0
    for i in range(0,number of system cores):
        ini = count
        end = count + The number of point features that should be reprojected by each core
        process = Process(target = cell, args = (ini,end,))
        processes.append(process)
        process.start()
        count = end

```

Similar to extraction of the rasters values to points in the Mercator coordinates, we drew the information from the rasters in geographic coordinates system and attributed to the points. For static predictors in the WGS 1984:

```
# Extract static predictors' raster values to points in WGS 1984 coordinate system,
# Usage: Extracts the cells' values of multiple rasters as attributes in
# the output point feature classes. Requirements: Spatial Analyst Extension.

import arcpy # Importing the ArcPy module
from arcpy import env
from arcpy.sa import *
import multiprocessing # Importing multi-processing module
from multiprocessing import Process
import time
import os
import os, fnmatch

# Setting the geo-processing environments
arcpy.env.workspace = r"Directory of the point feature classes"
arcpy.CheckOutExtension("Spatial")
arcpy.env.extent = "MAXOF"

# Reading all point feature layers in a directory
path = r" Directory of the point feature classes "
pattern = "*.shp"
shape_files = [ff for ff in os.listdir(path) if fnmatch.fnmatch(ff, pattern)]

# Defining the function that will be passed to child processes
# Function arguments: ini, end
def cell(ini,end):
    for j in range(ini,end):
        # j is the indicator for shape files
        inRasterList1 = [{"fertl_c3ann_Layer.tif", "c3ann"}, {"fertl_c3per_Layer.tif", "c3per"},
        [{"Global_water_table.tif", "WTD"},
        [{"Global_Aspect.tif", "Aspect"}, {"Topographic_index.tif", "Topo_index"},
        [{"Clay.tif", "Clay"},
        [{"Silt.tif", "Silt"}, {"Sand.tif", "Sand"},
        [{"average_soil_and_sedimentary-deposit_thickness.tif", "Soil_thick"},
        [{"95ecosys_rootdepth.tif", "95_Root_D"}]
        inRasterList2 = [{"WRB.tif", "WRB"}, {"Main_lithological_units_geographic.tif", "Main_litho"}]
        inPointFeatures = shape_files[j]
        # The value of the cell will be calculated from the adjacent cells with valid values using
        # bilinear interpolation
        ExtractMultiValuesToPoints(inPointFeatures,inRasterList1,"BILINEAR")
        # No interpolation will be applied to the categorical variables
        ExtractMultiValuesToPoints(inPointFeatures,inRasterList2,"NONE")

if __name__ == '__main__':
    processes = []
    count = 0
    for i in range(0,number of system cores):
        # To do each child process in a different temporary folder
        time.sleep(1.1)
        newTempDir = r"C:\temp\gptmpenvr_" + time.strftime('%Y%m%d%H%M%S') + str(i)
        os.mkdir(newTempDir)
        os.environ["TEMP"] = newTempDir
        os.environ["TMP"] = newTempDir
        ini = count
        end = count + The number of point features that should be processed by each core
        process = Process(target = cell, args = (ini,end,))
        processes.append(process)
        process.start()
        count = end
```

And for extraction of dynamic predictors in the WGS 1984 to attribute tables of the point feature classes:

```
# Extract dynamic predictors' raster values to points in WGS 1984 coordinate system,
# Usage: Extracts the cells' values of multiple rasters as attributes in
# the output point feature classes. Requirements: Spatial Analyst Extension.

import arcpy # Importing the ArcPy module
from arcpy import env
from arcpy.sa import *
```

```

import multiprocessing # Importing multi-processing module
from multiprocessing import Process
import time
import os
import os, fnmatch

# Setting the geo-processing environments
arcpy.env.workspace = r" Directory of the point feature classes"
arcpy.CheckOutExtension("Spatial")
arcpy.env.extent = "MAXOF"

# Reading all point feature layers in a directory
path = r" Directory of the point feature classes"
pattern = "*.shp"
shape_files = [ff for ff in os.listdir(path) if fnmatch.fnmatch(ff, pattern)]

# Defining the function that will be passed to child processes
# Function arguments: ini, end
def cell(ini,end):
    for j in range(ini,end):
        # j is the indicator for shape files
        inPointFeatures = shape_files[j]
        Year = 1
        for i in range(1980,2019):
            # i is the indicator for year
            inRasterList1 = [{"dtr_mean_"+str(i)+".tif", "dtr_"+str(Year)},
                ["pre_mean_"+str(i)+".tif", "Pre_"+str(Year)],
                ["tmp_mean_"+str(i)+".tif", "T_ave_"+str(Year)],
                ["tmx_mean_"+str(i)+".tif", "T_max_"+str(Year)],
                ["tmn_mean_"+str(i)+".tif", "T_min_"+str(Year)],
                ["Soil_moisture_mean_"+str(i)+".tif", "S_mo_"+str(Year)],
                ["PDSI_mean_"+str(i)+".tif", "PDSI_"+str(Year)],
                ["SM_"+str(i)+"_smoothed.tif", "Sat_SM_"+str(Year)],
                ["Gleam_S_"+str(i)+".tif", "Gleam_S_"+str(Year)],
                ["Mod_EVI_"+str(i)+".tif", "EVI_"+str(Year)],
                ["Mod_NDVI_"+str(i)+".tif", "NDVI_"+str(Year)],
                ["FAPAR_"+str(i)+"_smoothed.tif", "FAPAR_"+str(Year)],
                ["LAI_"+str(i)+"_smoothed.tif", "LAI_"+str(Year)],
                ["WS"+str(i)+".tif", "Wind_S_"+str(Year)],
                ["Skin_temp_"+str(i)+".tif", "Skin_T_"+str(Year)],
                ["Soiltemp1"+str(i)+".tif", "S_T_1_"+str(Year)],
                ["Soiltemp2_"+str(i)+".tif", "S_T_2_"+str(Year)],
                ["Soiltemp3_"+str(i)+".tif", "S_T_3_"+str(Year)],
                ["Soiltemp4"+str(i)+".tif", "S_T_4_"+str(Year)],
                ["pet_mean_"+str(i)+".tif", "Pet_"+str(Year)],
                ["def_mean_"+str(i)+".tif", "Def_"+str(Year)],
                ["aet_mean_"+str(i)+".tif", "aet_"+str(Year)]]
            inRasterList2 = [{"Land_cover_"+str(i)+".tif", "LC_"+str(Year)}]
            # The value of the cell will be calculated from the adjacent cells with valid values
            # using bilinear interpolation
            ExtractMultiValuesToPoints(inPointFeatures,inRasterList1,"BILINEAR")
            # No interpolation will be applied to the categorical variables
            ExtractMultiValuesToPoints(inPointFeatures,inRasterList2,"NONE")
            Year = Year+1

if __name__ == '__main__':
    # To do each child process in a different temporary folder
    count = 0
    processes = []
    for i in range(0, number of system cores):
        time.sleep(1.1)
        newTempDir = r"C:\temp\gptmpenvr_" + time.strftime('%Y%m%d%H%M%S') + str(i)
        os.mkdir(newTempDir)
        os.environ["TEMP"] = newTempDir
        os.environ["TMP"] = newTempDir
        ini = count
        end = count + The number of point features that should be processed by each core
        process = Process(target = cell, args = (ini,end,))
        processes.append(process)
        process.start()
        count = end

```

To more efficiently handle the size of the point feature classes and increasing the predictors' value extraction speed, we copied all 50,687 files (with WGS 1984 projection) in

four different directories and in each directory, we extracted the values of the dynamic predictors for a decade since 1980. 1980 - 1987 in the first directory, 1988 - 1998 in the second, 1999 - 2008 in the third, and 2009 - 2018 in the fourth directory. Data of static predictors in the geographic coordinates (WGS 1984) were attributed to the point feature classes in the first directory. So in total, we had five point feature classes for each spatial tile generated from the soil mask: one with data of static predictors in the Mercator coordinates, and four for the rest of predictors in the WGS 1984. The attribute tables of point feature layers were then merged, data of each individual year was extracted, and for each spatial tile, 39 comma delimited tables in .txt format were exported to 39 different directories using the following script in MATLAB (Mapping Toolbox license is required for MATLAB “shaperead” function):

```

clc;
clear;
%% Shape file to text file converter,
%% The global soil mask was split to 50,687 tiles and the smaller tiles
%% were then converted to the point feature layers to extract the values of the predictors
%% at each pixel. This script converts the attribute tables of the shapefiles (n = 50,687)
%% to comma delimited tables with .txt format importable by MATLAB for
%% further processing and making predictions.

% Setting the directory of shapefiles
Shape_files_Merc = dir('Directory of point feature classes in the World Mercator...
system\*.shp');
Shape_files_1 = dir('First directory \*.shp');
Shape_files_2 = dir('Second directory \*.shp');
Shape_files_3 = dir('Third directory \*.shp');
Shape_files_4 = dir('Fourth directory \*.shp');

% Reading the shapefiles and merging, we kept X and Y coordinate values only from the first
table in geographic coordinates system (WGS 1984)
parfor i = 1:50687
    S_Merc = shaperead(strcat(Shape_files_Merc(i).folder, '\', Shape_files_Merc(i).name));
    T_Merc = struct2table(S_Merc);
    T_Merc.Geometry = []; T_Merc.X = []; T_Merc.Y = []; T_Merc.pointid = [];
    T_Merc.grid_code = [];
    S_1 = shaperead(strcat(Shape_files_1(i).folder, '\', Shape_files_1(i).name));
    T_1 = struct2table(S_1);
    T_1.Geometry = []; T_1.pointid = []; T_1.grid_code = [];
    S_2 = shaperead(strcat(Shape_files_2(i).folder, '\', Shape_files_2(i).name));
    T_2 = struct2table(S_2);
    T_2.Geometry = []; T_2.X = []; T_2.Y = []; T_2.pointid = []; T_2.grid_code = [];
    S_3 = shaperead(strcat(Shape_files_3(i).folder, '\', Shape_files_3(i).name));
    T_3 = struct2table(S_3);
    T_3.Geometry = []; T_3.X = []; T_3.Y = []; T_3.pointid = []; T_3.grid_code = [];
    S_4 = shaperead(strcat(Shape_files_4(i).folder, '\', Shape_files_4(i).name));
    T_4 = struct2table(S_4);
    T_4.Geometry = []; T_4.X = []; T_4.Y = []; T_4.pointid = []; T_4.grid_code = [];
    table = [T_Merc T_1 T_2 T_3 T_4];

% Extracting data of individual years from 1980
for j = 1:39
    T = table(:, {'Elevation', 'Pla_cur', 'Pro_cur', 'Slope', ...
        'Slope_Leng', 'TRI', 'X', 'Y', 'c3ann', 'c3per', 'WTD', ...
        'Aspect', 'Topo_index', 'Clay', 'Silt', 'Sand', 'Soil_thick', ...
        'x95_Root_D', 'WRB', 'Main_litho', ...
        strcat('dtr_', num2str(j)), strcat('Pre_', num2str(j)), ...
        strcat('T_ave_', num2str(j)), strcat('T_max_', num2str(j)), ...
        strcat('T_min_', num2str(j)), strcat('S_mo_', num2str(j)), ...
        strcat('PDSI_', num2str(j)), strcat('Sat_SM_', num2str(j)), ...
        strcat('Gleam_S_', num2str(j)), strcat('EVI_', num2str(j)), ...
        strcat('NDVI_', num2str(j)), strcat('FAPAR_', num2str(j)), ...
        strcat('LAI_', num2str(j)), strcat('Wind_S_', num2str(j)), ...
        strcat('Skin_T_', num2str(j)), strcat('S_T_1_', num2str(j)), ...
        strcat('S_T_2_', num2str(j)), strcat('S_T_3_', num2str(j)), ...
        strcat('S_T_4_', num2str(j)), strcat('Pet_', num2str(j)), ...
        strcat('Def_', num2str(j)), strcat('aet_', num2str(j)), strcat('LC_', num2str(j))});
    T.Properties.VariableNames = {'Elevation', 'Pla_cur', 'Pro_cur', 'Slope', ...
        'Slope_Leng', 'TRI', 'X', 'Y', 'c3ann', 'c3per', 'WTD', ...
        'Aspect', 'Topo_index', 'Clay', 'Silt', 'Sand', 'Soil_thick', ...
        'dtr_', 'Pre_', 'T_ave_', 'T_max_', 'T_min_', ...
        'S_mo_', 'PDSI_', 'Sat_SM_', 'Gleam_S_', 'EVI_', 'NDVI_', 'FAPAR_', 'LAI_', 'Wind_S_', 'Skin_T_', ...

```

```

'S_T_1','S_T_2','S_T_3','S_T_4','Pet','Def','aet','LC'};
% Saving the final extracted tables in 39 different directories
% representing 39 years since 1980
writetable(T, strcat('The output directory on the disk\', num2str(1979 + j), '\', ...
num2str(1979 + j), '_', num2str(i), '.txt'));
end
end

```

To create 39 folders in Microsoft Windows 10 (the name of each folder was the number of the corresponding year), we used the following code in the command prompt:

```

@echo off
Driver's name (A capitalized letter like C or D):
for /l %%i in (1980,1,2018) do (md The desirable directory\%%i\%%j)

```

## 6.5 Model deployment

Following the extraction of predictors' values to points (we needed to make predictions of the soil salinity/sodicity for those points), we had 39 folders (representing 1980 to 2018) and in each folder there were 50,687 tables saved in .txt format. Each individual table was representative of a spatial tile created from the original soil mask, with 43 columns (2 for the x- and y- coordinates and 41 for the predictor values) and maximum of 3,600 rows. x- y- values were the coordinates of grids in the WGS 1984 coordinates system. For all observations, the sample's upper and lower depths were set to be zero and 30, respectively.

Tree based regression and classification models can handle the missing data by default; however, predictions for rows, which had more than five missing values of predictors were set as no data value. The indicator of no data value was 255. Each row in the tables was representative of a pixel from the original soil mask raster layer. The predictions made by models for each row, in addition to x- and y- values were later used to generate raster layers. The spatial resolution of these rasters was the same as original soil mask layer. We needed the area of each pixel to do zonal statistics and computing the area of different salinity classes at the country, biome, land cover, and climate levels. We directly calculated the area of each pixel in the WGS 1984 coordinates system from the x- and y- coordinates of input tables.

Additionally, for the classification step of the two-part models, we produced pixel-level scaled Shannon Entropy Index (7) ( $H_s$ ) to identify the certainty of the classifier in binary prediction of classes. For each particular class, the binary classifier returns a score indicating the probability that the predicted label comes from that class and the final predicted label is the class with the highest score. We transformed these scores to probability (a value between zero and one) using the "logit" transformation and computed the binary  $H_s$  by  $H_s = - (p(1) \times \log_2 p(1) + p(2) \times \log_2 p(2))$ ; where  $p(1)$  and  $p(2)$  were the per-class probabilities and  $\log_2$  was the logarithm with base 2.  $H_s$  shows the ambiguity in the model predictions and is a different concept from the validity of the predictions. Even with a zero  $H_s$ , the predicted labels can be false and therefore,  $H_s$  must not be used instead of the accuracy metrics for inspecting the validity of model predictions. The following script shows how we deployed the trained models to the tables and calculated each pixel's  $H_s$  and area in MATLAB:

```

clc;
clear;
%% Model deployment for making predictions from the new data,
%% This code gets tables of predictors as an input and returns vectors of the predicted values
%% and X and Y coordinates for each row. The size of the output vectors is equal to the number
%% of rows in the input tables (observations). Each row or observation in the input table is
%% representative of a pixel in the original soil mask. This code also directly calculates the
%% area of each pixel.

% This code predicts the values of ECE; variables need to be changed to ESP to make
predictions for ESP

```

```

% Loading the best trained classification and per-class regression models
load('Location of the fitted ensemble object on the disk\ens_13')
Classification = compact(ens); % Function compact removes unnecessary data from the fitted
% model object (ens)
clear ens;
load('Location of the fitted ensemble object on the disk \ens_2')
Regression_1 = compact(ens); % Fitted regression model on the saline class
clear ens;
load('Location of the fitted ensemble object on the disk \ens_20')
Regression_2 = compact(ens); % Fitted regression model on the non-saline class
clear ens;

% Setting constant parameters required for calculation of the pixel area
a = 6378137;
b = 6356752.3142;
% e = sqrt(1 - (b/a)^2) = 0.08181919084296;
e = 0.08181919084296;
cell_size = 0.0083333333;
edges = [0 4 8 16 100]; % Required for classifying the final predictions
% for ESP: edges = [0 6 15 30 100]

for ii = 1980:2018
    % 'ii' is the index of year. Input tables for each year are recorded in a separate
    % directory
    Text_files = dir(strcat('directory of the text files on the disk\',num2str(ii),'\*.txt'));
    parfor i = 1:numel(Text_files) % 'i' is the index of the input table
        % Preparing the tables
        T = readtable(strcat(Text_files(i).folder,'\ ',Text_files(i).name),'FileType',...
            'text','Delimiter',';', 'PreserveVariableNames',true);
        T = standardizeMissing(T,-9999); % Standardizing the missing values for MATLAB
        T = fillmissing(T,'nearest'); % Filling the missing values
        T.upper_dept = zeros(height(T),1); % Adding upper depth to the samples' attributes
        T.lower_dept = 30.*ones(height(T),1); % Adding lower depth to the samples' attributes
        % Categorizing the categorical variables in the training set
        T.WRB = categorical(T.WRB);
        T.LC = categorical(T.LC);
        T.Main_litho = categorical(T.Main_litho);

        % Predicting the labels for each class (classifying to saline and non-saline classes)
        % 'predict' function also returns a matrix of the classification scores
        % indicating the likelihood that the predicted label comes from a particular class
        [T.ECe,score] = predict(Classification,T);

        % Calculating scaled Shannon Entropy Index (Hs) using the per-class probability maps
        % For ESP the score matrix must first back-transform to probability
        % using: score = log(score./(1-score)); This is because
        % for ESP the classifier uses 'Bag' method and the returned
        % scores by this method are originally probabilities (values between 0 and 1);
        % however, during the training process, we set the score transformation to
        % be 'logit' and this transforms the scores to the values out of the
        % range of 0 and 1
        Hs = -(score(:,1).*log2(score(:,1)) + score(:,2).*log2(score(:,2)));
        Hs(sum(ismissing(T),2) > 5) = 255; % Setting the rows with more than five missing
        % values as no data
        % The indicator of the no data values is 255 here
        Hs = fillmissing(Hs,'constant',255);

        T.ECe(T.ECe == 1) = 10.^(predict(Regression_2,T(T.ECe == 1,:))-1); % Making
        % predictions for the non-saline class
        T.ECe(T.ECe == 2) = 10.^(predict(Regression_1,T(T.ECe == 2,:))); % Making predictions
        % for the saline class
        T.ECe(sum(ismissing(T),2) > 5) = 255; % Setting the rows with more than five missing
        % values as no data
        % The indicator of no data values is 255 here
        T.ECe(T.ECe < 0) = 0; % Setting the negative predictions as zero
        T.ECe = fillmissing(T.ECe,'constant',255);

        %%%%%%%%% Calculating m^2 area of a WGS 1984 square pixel %%%%%%%%%
        % Adapted from: https://gis.stackexchange.com/a/127327/2397
        % Parameters:
        % cell_size (float): Pixel size in the Geographic coordinates (WGS 1984)
        % Returns: Area of square pixel of side length cell_size in m^2
        f_up = deg2rad(T.Y + cell_size/2);
        f_down = deg2rad(T.Y - cell_size/2);
        zm_up = (1 - e*sin(f_up));
        zp_up = (1 + e*sin(f_up));
    end
end

```

```

area_up = pi * b^2 * (log(zp_up./zm_up)/(2*e) + sin(f_up)./(zp_up.*zm_up));
zm_down = (1 - e*sin(f_down));
zp_down = (1 + e*sin(f_down));
area_down = pi * b^2 * (log(zp_down./zm_down)/(2*e) + ...
sin(f_down)./(zp_down.*zm_down));
cell_area = cell_size/360.*(area_up - area_down);
grid = [T.X T.Y T.ECe Hs cell_area];

% Exporting the predictions, scores, and calculated areas for each
% observation (pixel) as a table
T_result = array2table(grid,'VariableNames', {'X' 'Y' 'ECe' 'Hs' 'Area'});
writetable(T_result, strcat('Output ...
directory\', num2str(ii), '\1\', 'ECe_', Text_files(i).name));
% Here we divide the output tables into four parts:
% non-saline, slightly saline, moderately saline, and extremely saline
% based on the predicted values of ECe and save each part separately. These are needed
% later to do zonal statistics in ArcPy. From the variables of tables, only the area
% of each pixel was required. Similar to this was conducted
% for ESP and sodicity
T_result.ECe = discretize(T_result.ECe, edges);
% edges of the classes are defined before 'ii' loop
T_result.Hs = [];
for j = 2:4
    Table = T_result(T_result.ECe == j, :);
    Table.ECe = [];
    if height(Table) ~= 0 % Removing the tables without any record
        writetable(Table, strcat('Output directory\', ...
            num2str(ii), '\', num2str(j), '\', 'ECe_', ...
            num2str(j), '_', Text_files(i).name));
    end
end
end
end
end

```

The results of applying the trained models to input tables including each row's (point/pixel) area, x-, y-,  $H_s$ , and the corresponding predictions were then exported as new comma delimited tables in .txt format. So the output was 39 folders with 50,687 text files within each folder. In addition, we separated the predicted  $EC_e$  and ESP values into four smaller bins. For salinity: 0 - 4 dS  $m^{-1}$ , 4 - 8 dS  $m^{-1}$ , 8 - 16 dS  $m^{-1}$ , and more than 16 dS  $m^{-1}$  and for sodicity: 0 - 6%, 6 - 15%, 15 - 30%, and more than 30%. Each bin included the left bin edge. According to these bins, we generated smaller sub-tables including only the values of x-, y-, and pixel area. We needed these later to calculate the per-class salinity and sodicity areas at the country, biome, land cover, and climate levels (see “[Zonal statistics](#)” section).

## 6.6 Trend analysis

As mentioned earlier, within each of 39 folders we had 50,687 output tables. We used the values of predictions for target variables from those output tables to create annual time series of  $EC_e$  and ESP between 1980 and 2018. By fitting a linear model to these time series, we generated different layers including trends of soil salinity variation since 1980, likelihood of soils with  $EC_e \geq 4$  dS  $m^{-1}$  or  $ESP \geq 6\%$ , and change in the likelihood of soils with  $EC_e \geq 4$  dS  $m^{-1}$  or  $ESP \geq 6\%$  (see Methods). The calculated coefficients (slopes) for locations with  $p \geq 0.05$  were set as no data value. The trend values and x- y- coordinates were then converted to raster datasets and mosaicked to generate the variation of global longitude-latitude grid cells of  $EC_e$  and ESP at 30" spatial resolution. Additionally, for the classification step of the two-part models, we produced 39-year mean of the pixel-level  $H_s$  ([Figure S23](#)). Also we generated other layers including the average of  $EC_e$ /ESP values between 1980 and 2018, and standard deviation of the predictions between 1980 and 2018. The following MATLAB code shows how we performed the trend analysis and computed the statistical layers:

```

clc;
clear;
%% Trend analysis,
%% This script returns the tables required for generation of the final raster layers.

```



```

%% It reads the predicted values from models and does trend analysis.
%% Also it computes mean, standard deviation, and scaled Shannon Entropy Index
%% of the predictions from 1980 to 2018. The code first reads the corresponding 39 tables from
%% each of 39 folders (representing the individual years between 1980 and 2018); each table
%% contains the X, Y, and predicted salinity values and is representative of a tile from the
%% original soil mask. Then puts 39 predictions in a matrix with 39 columns and rows equal to
%% the size of input tables (all 39 tables must have the same number of rows) and does trend
%% analysis for each row of the matrix. This processes will be repeated 50687 times to cover
%% all tables in all 39 directories.

% Note this code is generated for ECe; variables should be replaced by ESP for soil sodicity

parfor i = 1:50687
    % To have X and Y coordinates
    % 'i' is the index of tables in each folder
    table = readtable(strcat('Directory of the folder containing the tables of
        1980',num2str(i),'.txt'),'FileType',...
        'text','Delimiter',' ','PreserveVariableNames',true);
    % Pre-allocating memory to variables with varying size in each iteration
    tile_ECe = zeros(height(table),39);
    tile_Hs = zeros(height(table),39);
    tile_Area = zeros(height(table),39);

    jj = 1; % 'jj' is the index of the column in matrix created from the 39
    % individual years' tables
    for j = 1980:2018
        % 'j' is the index of year
        T = readtable(strcat('The directory where the output tables of the model deployment
            are saved\ECe\',num2str(j),'\1\ECe_',num2str(j),'_',num2str(i),'.txt'),'FileType',...
            'text','Delimiter',' ','PreserveVariableNames',true);
        % The predictions from 39 tables imported from 39 directories make a
        % matrix here with 39 columns
        T = standardizeMissing(T,255);
        tile_ECe(:,jj) = T.ECe;
        tile_Hs(:,jj) = T.Hs;
        tile_Area(:,jj) = T.Area;
        jj = jj+1;
    end

    end

    % Pre-allocating memory to variables with varying size in each iteration
    Coeff_value = zeros(height(table),1);
    P_value = zeros(height(table),1);
    Hs_mean = zeros(height(table),1);
    Mean = zeros(height(table),1);
    Std = zeros(height(table),1);
    Frequency_2 = zeros(height(table),1);
    Frequency_4 = zeros(height(table),1);
    Frequency_change_2 = zeros(height(table),1);
    Frequency_change_4 = zeros(height(table),1);

    % To each row of the created matrix, a linear model is fitted
    for ii = 1:height(table)
        mdl = fitlm(1980:2018,tile_ECe(ii,1:39)); % mdl is the object created from the linear
        % model fitting
        % Acquiring the slope coefficient and p-value for the t-statistic of the hypothesis
        % test that the corresponding coefficient is equal to zero or not
        % from the linear regression object
        mdl_Coefficients = table2array(mdl.Coefficients);
        Coeff_value(ii,1) = mdl_Coefficients(2,1);
        P_value(ii,1) = mdl_Coefficients(2,4);
        % Calculation of other required statistics
        Hs_mean(ii,1) = nanmean(tile_Hs(ii,:)); % Average of the scaled Shannon Entropy Index
        % between 39 years
        Mean(ii,1) = nanmean(tile_ECe(ii,:)); % Average of the predicted ECe values between 39
        % years
        Std(ii,1) = nanstd(tile_ECe(ii,:)); % Standard deviation of the predicted ECe values
        % between 39 years
        % Computing the frequency of happening saline soil assuming saline
        % soil has an ECe value more than 2 dS/m (or happening sodic soil with ESP value more
        % than 6% for ESP)
        Frequency_2(ii,1) = nansum(tile_ECe(ii,:) >= 2)/numel(1980:2018);
        % Computing the frequency of happening saline soil assuming saline
        % soil has an ECe value more than 4 dS/m
        Frequency_4(ii,1) = nansum(tile_ECe(ii,:) >= 4)/numel(1980:2018);
        % Computing the change in frequency of happening saline soil assuming saline
        % soil has an ECe value more than 4 dS/m (or happening sodic soil with ESP value more
        % than 6% for ESP)
    end
end

```

```

        Frequency_change_4(ii,1) = log(((nansum(tile_ECe(ii,21:39) >= 4) + 0.5)...
        /numel(2000:2018))/((nansum(tile_ECe(ii,2:20) >= 4) + 0.5)/numel(1981:1999)));
End

% Replacing the missing values with no data value indicators
Coeff_value = fillmissing(Coeff_value, 'constant', -9999);
P_value = fillmissing(P_value, 'constant', 255);
Hs_mean = fillmissing(Hs_mean, 'constant', 255);
Mean = fillmissing(Mean, 'constant', 255);
Std = fillmissing(Std, 'constant', 255);
Frequency_2 = fillmissing(Frequency_2, 'constant', 255);
Frequency_4 = fillmissing(Frequency_4, 'constant', 255);
Frequency_change_2 = fillmissing(Frequency_change_2, 'constant', 255);
Frequency_change_2(Frequency_change_2 == Inf) = 255;
Frequency_change_4 = fillmissing(Frequency_change_4, 'constant', 255);
Frequency_change_4(Frequency_change_4 == Inf) = 255;

% Creating matrices form the results
Coeff_matrix = [table.X table.Y Coeff_value P_value];
table_fitlm = array2table(Coeff_matrix, 'VariableNames', ...
    {'X' 'Y' 'Coeff_value' 'P_value'});
Hs_matrix = [table.X table.Y Hs_mean];
table_Hs_mean = array2table(Hs_matrix, 'VariableNames', ...
    {'X' 'Y' 'Hs_mean'});
Mean_matrix = [table.X table.Y Mean];
table_Mean = array2table(Mean_matrix, 'VariableNames', ...
    {'X' 'Y' 'Mean'});
Std_matrix = [table.X table.Y Std];
table_Std = array2table(Std_matrix, 'VariableNames', ...
    {'X' 'Y' 'Std'});
Frequency_2_matrix = [table.X table.Y table.Area Frequency_2];
table_Frequency_2 = array2table(Frequency_2_matrix, 'VariableNames', ...
    {'X' 'Y' 'Area' 'Frequency_2'});
Frequency_4_matrix = [table.X table.Y table.Area Frequency_4];
table_Frequency_4 = array2table(Frequency_4_matrix, 'VariableNames', ...
    {'X' 'Y' 'Area' 'Frequency_4'});
Frequency_change_2_matrix = [table.X table.Y Frequency_change_2];
table_Frequency_change_2 = array2table(Frequency_change_2_matrix, 'VariableNames', ...
    {'X' 'Y' 'Frequency_change_2'});
Frequency_change_4_matrix = [table.X table.Y Frequency_change_4];
table_Frequency_change_4 = array2table(Frequency_change_4_matrix, 'VariableNames', ...
    {'X' 'Y' 'Frequency_change_4'});

% Exporting the required results as tables into different directories
writetable(table_fitlm(table_fitlm.P_value <= 0.05, 1:3), strcat('Output...
directory\Coeff_05', num2str(i), '.txt'));
writetable(table_fitlm(:, 1:3), strcat('Output directory\Coeff', num2str(i), '.txt'));
writetable(table_fitlm(:, [1 2 4]), strcat('Output directory\P_value', num2str(i), '.txt'));
writetable(table_Hs_mean, strcat('Output directory\Hs_mean', num2str(i), '.txt'));
writetable(table_Mean, strcat('Output directory\Mean', num2str(i), '.txt'));
writetable(table_Std, strcat('Output directory\Std', num2str(i), '.txt'));
writetable(table_Frequency_2(:, [1 2 4]), strcat('Output...
directory\Frequency_2', num2str(i), '.txt'));
writetable(table_Frequency_2(table_Frequency_2.Frequency_2 >= 0.75, 1:3), ...
strcat('Output directory\Frequency_2_area', num2str(i), '.txt'));
writetable(table_Frequency_4(:, [1 2 4]), strcat('Output...
directory\Frequency_4', num2str(i), '.txt'));
writetable(table_Frequency_4(table_Frequency_4.Frequency_4 >= 0.75, 1:3), ...
strcat('Output directory\Frequency_4_area', num2str(i), '.txt'));
writetable(table_Frequency_change_4, strcat('Output...
directory\Frequency_change_4', num2str(i), '.txt'));
end

```

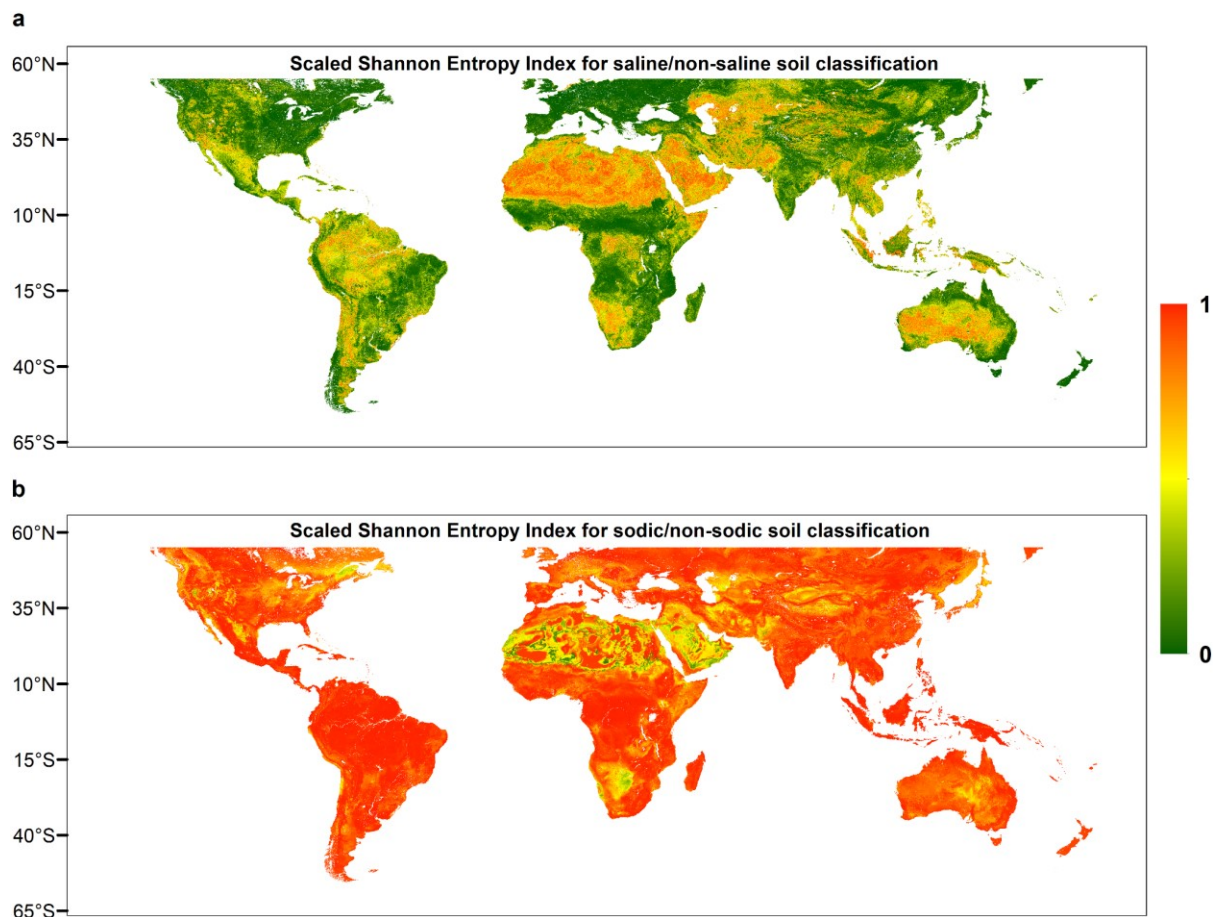

**Figure S23: Spatial distribution of the scaled Shannon Entropy index ( $H_s$ ) for the classification part of the two-part models.** Values close to zero indicate that the classifier is more certain about the results of binary classification task. Values of  $H_s$  should not be confused with the accuracy of classification. Even with a zero  $H_s$ , still the classifier can make wrong predictions.

## 6.7 Rasterizing the generated tables

To reduce the required time for rasterizing the output tables, first we merged the 50,687 tables and reduced the number of output tables to a number below 500. During this merging process, we also multiplied the predictions for target variables by 100, 10,000, or 100,000 (depending on the needed accuracy) and rounded the results to remove the decimal point from the predictions. Using the signed integer values substantially reduced the required disk space for saving the final raster layers generated from the output tables. The following MATLAB code shows how we merged the tables, converted the float predictions to integer, and defined no data value indicators of the final rasters (generated from the output tables):

```

clc;
clear;
%% Table Merger,
%% This MATLAB code merges a large number of tables in a directory, passes the contents of the
%% merged table to a desirable number of tables, and export those tables into another
%% directory. Also the table variables (exempt X and Y coordinates)
%% will be converted from float to integer during the merging process.

% Reading all tables in a directory (in .txt format) and copying them into the memory
P = strcat('Directory of the original comma delimited input tables');
S = dir(fullfile(P, '*.txt'));
C = cell(1, numel(S));
parfor k = 1: numel(S)
    F = fullfile(P, S(k).name);
    C{k} = readtable(F, 'FileType', ...

```

```

        'text','Delimiter',' ','PreserveVariableNames',true);
end

% Merging tables
Table = vertcat(C{:});

% Multiplying table variables by 100, 10000, or 100000 depending on the needed accuracy and
% rounding the results to remove the decimal point
Table.var = round(Table.var * 10000);
% Setting no data value indicators
Table.var(Table.var == round(no data indicator of input tables * 10000)) = No data indicator;

% Passing the contents of the merged table to a desirable number of tables
[~,~,bin] = histcounts(1:height(Table),500);
T = cell(1,500);
for z = 1:500
    T{z} = Table(bin == z,:);
end

% Exporting the resulting tables to a desirable directory
parfor z = 1:500
    TT = vertcat(T{z});
    writetable(TT, strcat('Desirable output directory\desirable table name',...
        num2str(z),'.txt'));
end

```

We converted the x- y- values in the output tables to in-memory point feature layers and afterwards converted the generated in-memory point feature layers to rasters using the ArcPy “point to raster” tool. The created rasters were then mosaicked in ArcMap GUI and exported as one single global raster with 0.008333333° spatial resolution. The following Python code shows how we converted the tables to rasters:

```

# Table to raster converter,
# this code gets X, Y, and predicted values for target variables in a .txt table and generates
# the raster datasets.

import multiprocessing # Importing the ArcPy module
from multiprocessing import Process # Importing multi-processing module
import arcpy
import os
import os, fnmatch

# Setting the geo-processing environments
arcpy.env.overwriteOutput = True
arcpy.env.workspace = r"Directory of the tables"

# Reading all .txt tables in a directory
path = r"Directory of the tables"
pattern = "*.txt"
Text_files = [ff for ff in os.listdir(path) if fnmatch.fnmatch(ff, pattern)]

# Defining the function that will be passed to child processes
# Function arguments: ini, end
def cell(ini,end):
    jj = range(ini,end)
    for j in jj:
        string = Text_files[j]
        string = string[0:(len(string)-4)]
        in_table = Text_files[j]
        x_coords = "X" # Longitude in the table
        y_coords = "Y" # Latitude in the table
        # Making a point feature class from the variables in the tables on the memory
        arcpy.MakeXYEventLayer_management(in_table, x_coords , y_coords, "out_Layer")
        # Execution of the ArcPy point to raster tool,
        # 0.008333333 is the resolution of the final raster
        arcpy.PointToRaster_conversion("out_Layer", "Coeff_value", r"Output directory/"+string +
            ".tif", "", "", 0.008333333)

if __name__ == '__main__':
    ii = count = 0
    for i in range(0, number of system cores):
        ini = count

```

```

end = count + + The number of tables that should be converted to raster by each core
process = Process(target = cell, args = (ini,end,))
processes.append(process)
process.start()
count = end

```

## 6.8 Zonal statistics

As mentioned earlier in the “[Model deployment](#)” section, we classified the predicted values of EC<sub>e</sub> and ESP to four classes or bins for each variable (8 classes in total). This classification enabled us to do different analysis on the total area of salt-affected soils between various thresholds. From those four bins for each variable, only the bins with an EC<sub>e</sub> ≥ 4 dS m<sup>-1</sup> and an ESP ≥ 6% were required for area analysis. Instead of saving the values of EC<sub>e</sub> or ESP, the calculated area of pixels (based on x- y- coordinates) were saved as the final tables (x-, y-, and Area) into the corresponding folders. The result for each target variable was 39 folders (representing each year between 1980 and 2018) with 3 sub-folders including the generated tables for each bin. A similar script to the one presented in previous section ([Rasterizing the generated tables](#)) was used to rasterize all tables within the sub-folders. Each raster was representing the area of pixels labelled with different classes of the soil salinity or sodicity. To make it clearer, we provide an example from the final arrangement of the generated raster files. For EC<sub>e</sub> as a target variable in the 1999 main folder, for example, we had three sub-folders with the names of 1, 2, and 3, representing the three bins of salinity: 4 - 8, 8 - 16, and equal or greater than 16, respectively. Within each sub-folder, we had a set of raster files. These raster files included information on the area of pixels, which were estimated to have an EC<sub>e</sub> value falling into the corresponding bin of salinity. The following script was used to mosaic the final generated raster files within each sub-folder:

```

# Raster mosaicing,
# This script gets a set of raster datasets in a directory and mosaic all of them into a new
# raster.

# Importing the required modules
import arcpy
from arcpy import env
from arcpy.sa import *
import os
import os, fnmatch

pattern = "*.tif"
j = 1
j = str(j)
for i in range(1980,2019):
    arcpy.env.workspace = r"Directory of the rasters on the disk/ECe/"+str(i)+"/"+j
    path = r" Directory of the rasters on the disk /ECe/"+str(i)+"/"+j
    tif_files = [ff for ff in os.listdir(path) if fnmatch.fnmatch(ff, pattern)]
    arcpy.CreateRasterDataset_management("../ECe/"+str(i)+"/"+j, " ECe_"+str(i)+"_"+j+
        ".tif", "0.008333333", "32_BIT_FLOAT", "", "1", "", "", "LZ77", "", "")
    arcpy.Mosaic_management(tif_files, "../Mosaiced_rasters/ECe/"+str(i)+"/"+j+"/ECe_"+str(i)+"_"+j+
        ".tif", "BLEND", "", "", "No Data Value", "", "", "")

```

Using ArcMap “zonal statistics as table” tool, the area of soils with EC<sub>e</sub> ≥ 4 dS m<sup>-1</sup> or ESP ≥ 6% at the country, continent, biome, land cover, and climate level was calculated from the mosaicked rasters for different years. The following code in Python was used to calculate the sum of salt-affected areas between various thresholds in each zone delineated by input rasters of country, continent, biome, land cover, and climate:

```

# Zonal statistics as table,
# Summarizes the values of a raster within the zones of another dataset and reports the
# results in a table.

import arcpy

```

```

from arcpy import env
from arcpy.sa import *
import os
import os, fnmatch

# Setting the geo-processing environments
arcpy.CheckOutExtension("Spatial")

# Input rasters that delineate the zones
pattern = "*.tif"
inZoneData_1 = ".../Continent_level.tif"
zoneField_1 = "Continent_name"
inZoneData_2 = ".../gadm_country_level.tif"
zoneField_2 = "Country_name"
inZoneData_3 = ".../Biome_level.tif"
zoneField_3 = "Biome_name"
inZoneData_4 = ".../Land_cover_level.tif"
zoneField_4 = "Land_cover_name"
inZoneData_5 = ".../Climate_zone_level.tif"
zoneField_5 = "climate_name"

for i in range(1980,2019):
# i represents the year
for j in range(1,4): # j represents the bin of salinity or sodicity
env.workspace = ".../Mosaiced_rasters/ECe/"+str(i)+"/"+str(j)
path = ".../Mosaiced_rasters/ECe/"+str(i)+"/"+str(j)
tif_files = [ff for ff in os.listdir(path) if fnmatch.fnmatch(ff, pattern)]
outZSaT = ZonalStatisticsAsTable(inZoneData_1, zoneField_1, tif_files[0],
"in_memory/dbf", "DATA", "SUM")
arcpy.TableToTable_conversion("in_memory/dbf", ".../zonal_stat_results/ECe/"+str(i)+"/"+str(j),
"Continent_level_"+str(i)+".txt")
arcpy.Delete_management("in_memory/dbf")
outZSaT = ZonalStatisticsAsTable(inZoneData_2, zoneField_2, tif_files[0],
"in_memory/dbf", "DATA", "SUM")
arcpy.TableToTable_conversion("in_memory/dbf", ".../zonal_stat_results/ECe/"+str(i)+"/"+str(j),
"Country_level_"+str(i)+".txt")
arcpy.Delete_management("in_memory/dbf")
outZSaT = ZonalStatisticsAsTable(inZoneData_3, zoneField_3, tif_files[0],
"in_memory/dbf", "DATA", "SUM")
arcpy.TableToTable_conversion("in_memory/dbf", ".../zonal_stat_results/ECe/"+str(i)+"/"+str(j),
"Biome_level_"+str(i)+".txt")
arcpy.Delete_management("in_memory/dbf")
outZSaT = ZonalStatisticsAsTable(inZoneData_4, zoneField_4, tif_files[0],
"in_memory/dbf", "DATA", "SUM")
arcpy.TableToTable_conversion("in_memory/dbf", ".../zonal_stat_results/ECe/"+str(i)+"/"+str(j),
"Land_cover_level_"+str(i)+".txt")
arcpy.Delete_management("in_memory/dbf")
outZSaT = ZonalStatisticsAsTable(inZoneData_5, zoneField_5, tif_files[0],
"in_memory/dbf", "DATA", "SUM")
arcpy.TableToTable_conversion("in_memory/dbf", ".../zonal_stat_results/ECe/"+str(i)+"/"+str(j),
"Climate_level_"+str(i)+".txt")
arcpy.Delete_management("in_memory/dbf")

```

The generated tables (saved in .txt format) were then imported to MATLAB for area analysis and generation of the figures.

## 6.9 Figures

Plots in [Figure 2](#) were initially generated in MATLAB and then copy pasted into ArcMap. The final generated figure was exported by ArcMap. The following code shows the MATLAB part and it calculates the soil areas with an  $EC_e \geq 4 \text{ dS m}^{-1}/EC_e \geq 2 \text{ dS m}^{-1}$  and/or  $ESP \geq 6\%/ESP \geq 15\%$ :

```

clc;
clear;

% Reading all tables in a directory containing the output tables of the trend analysis.
% Each table contains X, Y, and pixel area.
% Calculated areas are related to the pixels for which the likelihood of happening ECe or
% ESP equal or greater than specific thresholds is more than 0.75; in other

```

```
% words, in three-fourths of the years between 1980 and 2018, the likelihood of happening ECe
% or ESP for those pixels has been equal or greater than specific thresholds.
```

```
P = strcat('...\Tables');% Reading the tables for likelihood of happening ECe >= 2
S = dir(fullfile(P,'*.txt'));
C = cell(1,numel(S));
parfor k = 1:numel(S)
    F = fullfile(P,S(k).name);
    C{k} = readtable(F,'FileType',...
        'text','Delimiter',' ','PreserveVariableNames',true);
end
Table = vertcat(C{:}); % Merging all tables
Table(Table.Y > 55,:) = [];
longitude = unique(Table.X);
longitude_area = zeros(length(longitude),1);
for i = 1:length(longitude)
    longitude_area(i) = sum(Table.Area(Table.X == longitude(i)));
end
Longitude_figure = [longitude longitude_area];
Longitude_figure = array2table(Longitude_figure,'VariableNames',...
{'longitude' 'longitude_area'});
writetable(Longitude_figure,'...\ECe_2_Longitude_figure.txt');
latitude = unique(Table.Y);
latitude_area = zeros(length(latitude),1);
for i = 1:length(latitude)
    latitude_area(i) = sum(Table.Area(Table.Y == latitude(i)));
end
Latitude_figure = [latitude latitude_area];
Latitude_figure = array2table(Latitude_figure,'VariableNames',{'latitude' 'latitude_area'});
writetable(Latitude_figure,'...\ECe_2_Latitude_figure.txt');

%%%%%%%%%%
clear;
P = strcat('...\Tables');% Reading the tables for likelihood of happening ECe >= 4
S = dir(fullfile(P,'*.txt'));
C = cell(1,numel(S));
parfor k = 1:numel(S)
    F = fullfile(P,S(k).name);
    C{k} = readtable(F,'FileType',...
        'text','Delimiter',' ','PreserveVariableNames',true);
end
Table = vertcat(C{:});
Table(Table.Y > 55,:) = [];
longitude = unique(Table.X);
longitude_area = zeros(length(longitude),1);
for i = 1:length(longitude)
    longitude_area(i) = sum(Table.Area(Table.X == longitude(i)));
end
Longitude_figure = [longitude longitude_area];
Longitude_figure = array2table(Longitude_figure,'VariableNames', ...
{'longitude' 'longitude_area'});
writetable(Longitude_figure,'...\ECe_4_Longitude_figure.txt');
latitude = unique(Table.Y);
latitude_area = zeros(length(latitude),1);
for i = 1:length(latitude)
    latitude_area(i) = sum(Table.Area(Table.Y == latitude(i)));
end
Latitude_figure = [latitude latitude_area];
Latitude_figure = array2table(Latitude_figure,'VariableNames',{'latitude' 'latitude_area'});
writetable(Latitude_figure,'...\ECe_4_Latitude_figure.txt');
%%%%%%%%%% Generation of subplots
clear;
P = strcat('...\Tables');% Reading the tables for likelihood of happening ESP >= 6
S = dir(fullfile(P,'*.txt'));
C = cell(1,numel(S));
parfor k = 1:numel(S)
    F = fullfile(P,S(k).name);
    C{k} = readtable(F,'FileType',...
        'text','Delimiter',' ','PreserveVariableNames',true);
end
Table = vertcat(C{:});
Table(Table.Y > 55,:) = [];
```

```

longitude = unique(Table.X);
longitude_area = zeros(length(longitude),1);
for i = 1:length(longitude)
    longitude_area(i) = sum(Table.Area(Table.X == longitude(i)));
end
Longitude_figure = [longitude longitude_area];
Longitude_figure = array2table(Longitude_figure, 'VariableNames', {'longitude'
'longitude_area'});
writetable(Longitude_figure, '...\ESP_6_Longitude_figure.txt');
latitude = unique(Table.Y);
latitude_area = zeros(length(latitude),1);
for i = 1:length(latitude)
    latitude_area(i) = sum(Table.Area(Table.Y == latitude(i)));
end
Latitude_figure = [latitude latitude_area];
Latitude_figure = array2table(Latitude_figure, 'VariableNames', {'latitude' 'latitude_area'});
writetable(Latitude_figure, '...\ESP_6_Latitude_figure.txt');

P = strcat('\Tables'); % Reading the tables for likelihood of happening ESP >= 15
S = dir(fullfile(P, '*.txt'));
C = cell(1, numel(S));
parfor k = 1: numel(S)
    F = fullfile(P, S(k).name);
    C{k} = readtable(F, 'FileType', ...
        'text', 'Delimiter', ',', 'PreserveVariableNames', true);
end
Table = vertcat(C{:});
Table(Table.Y > 55, :) = [];
longitude = unique(Table.X);
longitude_area = zeros(length(longitude),1);
for i = 1:length(longitude)
    longitude_area(i) = sum(Table.Area(Table.X == longitude(i)));
end
Longitude_figure = [longitude longitude_area];
Longitude_figure = array2table(Longitude_figure, 'VariableNames', {'longitude'
'longitude_area'});
writetable(Longitude_figure, '...\ESP_15_Longitude_figure.txt');
latitude = unique(Table.Y);
latitude_area = zeros(length(latitude),1);
for i = 1:length(latitude)
    latitude_area(i) = sum(Table.Area(Table.Y == latitude(i)));
end
Latitude_figure = [latitude latitude_area];
Latitude_figure = array2table(Latitude_figure, 'VariableNames', {'latitude' 'latitude_area'});
writetable(Latitude_figure, '...\ESP_15_Latitude_figure.txt');

%% Subplots related to ECe
figure;

subplot(5,6,25:29);
Longitude_figure_2 = readtable('...\ECE_2_Longitude_figure.txt', 'FileType', ...
    'text', 'Delimiter', ',', 'PreserveVariableNames', true);
P1 = plot(Longitude_figure_2.longitude, Longitude_figure_2.longitude_area./1000000, ...
    'Color', 'r', 'LineWidth', 1.5);
set(gca, 'fontname', 'Arial', 'FontSize', 20)
box on
ax = gca;
ax.LineWidth = 1;
ax.XColor = 'k';
ax.YColor = 'k';
ax.TickLength = [0.004 0.035];
ylabel('Area (km2)', 'Color', 'k');
xlabel('Longitude (degree)', 'Color', 'k');
hold on
Longitude_figure_4 = readtable('...\ECE_4_Longitude_figure.txt', 'FileType', ...
    'text', 'Delimiter', ',', 'PreserveVariableNames', true);
P2 = plot(Longitude_figure_4.longitude, Longitude_figure_4.longitude_area./1000000, ...
    'Color', 'b', 'LineWidth', 1.5);
xlim([-180 180]);
ytickformat('%4.4g')
L = legend([P1 P2], ...
    {'EC_{e} \geq 2 dS m^{-1}', 'EC_{e} \geq 4 dS m^{-1}'}, 'Location', 'northwest', 'FontSize', 14);
title(L, 'Salinity threshold:');

```



```

ax.YAxisLocation = 'left';
ax.XMinorTick = 'on';
ax.YMinorTick = 'on';

subplot(5,6,[12 18 24]);
Latitude_figure_2 = readtable('...\ECE_2_Latitude_figure.txt','FileType',...
    'text','Delimiter',' ','PreserveVariableNames',true);
P1 = plot(Latitude_figure_2.latitude_area./1000000,Latitude_figure_2.latitude,...
    'Color','r','LineWidth',1.5);
set(gca,'fontname','Arial','FontSize',20)
box on
ax = gca;
ax.LineWidth = 1;
ax.XColor = 'k';
ax.YColor = 'k';
ylabel('Latitude (degree)','Color','k');
xlabel('Area (km2)','Color','k');
hold on
Latitude_figure_4 = readtable('...\ECE_4_Latitude_figure.txt','FileType',...
    'text','Delimiter',' ','PreserveVariableNames',true);
P2 = plot(Latitude_figure_4.latitude_area./1000000,Latitude_figure_4.latitude,...
    'Color','b','LineWidth',1.5);
ylim([-55 55]);
ax.YTick = [-50 -25 0 25 50];
xtickformat('%4.4g')
L = legend([P1 P2],...
    {'EC_{e} \geq 2 dS m-1','EC_{e} \geq 4 dS m-1','Location','southeast','FontSize',12});
title(L,'Salinity threshold:')
ax.XMinorTick = 'on';
ax.YMinorTick = 'on';
ax.YAxisLocation = 'right';

subplot(5,6,[13 19]);
Hor_bar_fig_2 = readtable('...\Continent_level.txt','FileType',...
    'text','Delimiter',' ','PreserveVariableNames',true);
Hor_bar_fig_2_mid_chi = readtable('...\Middle_east_china.txt','FileType',...
    'text','Delimiter',' ','PreserveVariableNames',true);
Hor_bar_fig_2_mid_chi.CONTINENT = Hor_bar_fig_2_mid_chi.NAME_0;
Hor_bar_fig_2_mid_chi.NAME_0 = [];
table_2 = [Hor_bar_fig_2;Hor_bar_fig_2_mid_chi];
Area_2 = sortrows(table_2,'SUM','descend');
Hor_bar_fig_4 = readtable('...\Continent_level.txt','FileType',...
    'text','Delimiter',' ','PreserveVariableNames',true);
Hor_bar_fig_4_mid_chi = readtable('...\Middle_east_china.txt','FileType',...
    'text','Delimiter',' ','PreserveVariableNames',true);
Hor_bar_fig_4_mid_chi.CONTINENT = Hor_bar_fig_4_mid_chi.NAME_0;
Hor_bar_fig_4_mid_chi.NAME_0 = [];
table_4 = [Hor_bar_fig_4;Hor_bar_fig_4_mid_chi];
Area_4 = sortrows(table_4,'SUM','descend');
Area = [Area_2.SUM Area_4.SUM];
b = barh(Area./1000000000,0.75);
b(1).FaceColor = 'r';
b(2).FaceColor = 'b';
set(gca,'fontname','Arial','FontSize',20)
box on
ax = gca;
ax.LineWidth = 1;
ax.XColor = 'k';
ax.YColor = 'k';
xlabel('Area (1,000 km2)','Color','k');
Area_2.CONTINENT{3} = 'Middle E.';
Area_2.CONTINENT{6} = 'S. America';
Area_2.CONTINENT{7} = 'N. America';
ax.YTickLabel = Area_2.CONTINENT;
ax.YDir = 'reverse';
L = legend({'EC_{e} \geq 2 dS m-1','EC_{e} \geq 4 dS m-1','Location','southeast','FontSize',12});
title(L,'Salinity threshold:')
ax.Position = [0.1300 0.34 0.1 0.3];
ax.XTick = [0 2500 5000];
xtickformat('%4.4g')
ax.XMinorTick = 'on';

% %% Subplots related ESP
figure;

```

```

subplot(5,6,25:29);
Longitude_figure_6 = readtable('...\ESP_6_Longitude_figure.txt','FileType',...
    'text','Delimiter',' ','PreserveVariableNames',true);
P1 = plot(Longitude_figure_6.longitude,Longitude_figure_6.longitude_area./1000000,...
    'Color','r','LineWidth',1.5);
set(gca,'fontname','Arial','FontSize',20)
box on
ax = gca;
ax.LineWidth = 1;
ax.XColor = 'k';
ax.YColor = 'k';
ax.TickLength = [0.004 0.035];
ylabel('Area (km^{2})','Color','k');
xlabel('Longitude (degree)','Color','k');
hold on
Longitude_figure_15 = readtable('...\ESP_15_Longitude_figure.txt','FileType',...
    'text','Delimiter',' ','PreserveVariableNames',true);
P2 = plot(Longitude_figure_15.longitude,Longitude_figure_15.longitude_area./1000000,...
    'Color','b','LineWidth',1.5);
xlim([-180 180]);
ytickformat('%4.4g')
L = legend([P1 P2],{'ESP \geq 6%','ESP \geq 15%'},'Location','northwest','FontSize',16);
title(L,'Sodicity threshold:');
ax.YAxisLocation = 'left';
ax.XTick = [-150 -100 -50 0 50 100 150];
ax.XMinorTick = 'on';
ax.YMinorTick = 'on';

subplot(5,6,[12 18 24]);
Latitude_figure_4 = readtable('...\ESP_6_Latitude_figure.txt','FileType',...
    'text','Delimiter',' ','PreserveVariableNames',true);
P1 = plot(Latitude_figure_4.latitude_area./1000000,Latitude_figure_4.latitude,...
    'Color','r','LineWidth',1.5);
set(gca,'fontname','Arial','FontSize',20)
box on
ax = gca;
ax.LineWidth = 1;
ax.XColor = 'k';
ax.YColor = 'k';
ylabel('Latitude (degree)','Color','k');
xlabel('Area (km^{2})','Color','k');
hold on
Latitude_figure_15 = readtable('...\ESP_15_Latitude_figure.txt','FileType',...
    'text','Delimiter',' ','PreserveVariableNames',true);
P2 = plot(Latitude_figure_15.latitude_area./1000000,Latitude_figure_15.latitude,...
    'Color','b','LineWidth',1.5);
ylim([-55 55]);
xtickformat('%4.4g')
L = legend([P1 P2],{'ESP \geq 6%','ESP \geq 15%'},'Location','southeast','FontSize',12);
title(L,'Sodicity threshold:');
ax.YTick = [-50 -25 0 25 50];
ax.XMinorTick = 'on';
ax.YMinorTick = 'on';
ax.YAxisLocation = 'right';

subplot(5,6,[13 19]);
Hor_bar_fig_6 = readtable('...\Continent_level.txt','FileType',...
    'text','Delimiter',' ','PreserveVariableNames',true);
Hor_bar_fig_6_mid_chi = readtable('...\Middle_east_china.txt','FileType',...
    'text','Delimiter',' ','PreserveVariableNames',true);
Hor_bar_fig_6_mid_chi.CONTINENT = Hor_bar_fig_6_mid_chi.NAME_0;
Hor_bar_fig_6_mid_chi.NAME_0 = [];
Hor_bar_fig_6.OID_ = [];Hor_bar_fig_6_mid_chi.Rowid_ = [];
table_6 = [Hor_bar_fig_6;Hor_bar_fig_6_mid_chi];
table_6(9,:) = table_6(6,:);
table_6(6,:) = [];
Area_6 = sortrows(table_6,'CONTINENT','descend');
Hor_bar_fig_15 = readtable('...\Fre_15_area_continet_level.txt','FileType',...
    'text','Delimiter',' ','PreserveVariableNames',true);
Hor_bar_fig_15_mid_chi = readtable('...\Fre_15_area_Middle_east_china.txt','FileType',...
    'text','Delimiter',' ','PreserveVariableNames',true);
Hor_bar_fig_15_mid_chi.CONTINENT = Hor_bar_fig_15_mid_chi.NAME_0;
Hor_bar_fig_15_mid_chi.NAME_0 = [];
table_15 = [Hor_bar_fig_15;Hor_bar_fig_15_mid_chi];
table_15(8,2) = {'Europe'};
table_15.OID_ = [];
Area_15 = sortrows(table_15,'CONTINENT','descend');

```

```

Area = [Area_6.SUM Area_15.SUM];
b = barh(Area./1000000000,0.75);
b(1).FaceColor = 'r';
b(2).FaceColor = 'b';
set(gca,'fontname','Arial','FontSize',20)
box on
ax = gca;
ax.LineWidth = 1;
ax.XColor = 'k';
ax.YColor = 'k';
xlabel('Area (1,000 km2)','Color','k');
Area_6.CONTINENT{1} = 'S. America';
Area_6.CONTINENT{2} = 'N. America';
Area_6.CONTINENT{3} = 'Middle E.';
ax.YTickLabel = Area_6.CONTINENT;
ax.XTick = [0 3000 6000];
L = legend({'ESP \geq 6%', 'ESP \geq 15%'}, 'Location', 'southeast', 'FontSize', 12);
title(L, 'Sodicity threshold:')
ax.XMinorTick = 'on';
ax.Position = [0.1300 0.34 0.1 0.3];
xlim([0 7000]);
xtickformat('%4.4g')

```

Figure S1 was generated by a combination of MATAB, Microsoft PowerPoint, and ArcMap. The following script was used for creation of the Figure S1 in MATLAB and the generated figure was copy-pasted into the ArcMap GUI to become combined with the outputs of the Microsoft PowerPoint. The final version of Figure S1 was exported by ArcMap.

```

clc;
clear;
% This code shows how we generated Figure S1 in the manuscript.

% subplot (a)
ens = ... load('...\Best binary classification model object for ECe.mat');
Truelabels = ens.ens.Y;
% Validation and Acquiring accuracy metrics
cvens = crossval(ens.ens, 'Kfold', 10);
Predictedlabels = kfoldPredict(cvens);
Variables = [Truelabels Predictedlabels];
Variables_table = array2table(Variables, 'VariableNames', {'Truelabels' 'Predictedlabels'});
writetable(Variables_table, '...\ECe_Classification_cross_validation.txt');
T = readtable('...\ECe_Classification_cross_validation', 'FileType', 'text', 'Delimiter', ',', ...
    'PreserveVariableNames', true);
Truelabels = T.Truelabels;
Predictedlabels = T.Predictedlabels;
C = confusionmat(Truelabels, Predictedlabels);
cm = confusionchart(C, 'RowSummary', 'row-normalized', 'ColumnSummary', 'column-normalized');
% The generated figure was exported to Microsoft PowerPoint and after modifications was sent
to ArcMap
subplot(2,3,1);
set(gca,'fontname','Arial','FontSize',20)
ax = gca;
box on
ax.LineWidth = 1;
ax.XColor = 'k';
ax.YColor = 'k';
ax.XTick = [];
ax.YTick = [];
ty = ylabel('True class','Color','k');
ty.Position = [-0.08 0.65 0];
tx = xlabel('Predicted class','Color','k');
tx.Position = [0.46 -.087 0];
tit = title('Soil salinity classification','FontSize',18);
text(-0.12,1.1,0, 'a', 'Units', 'Normalized', 'fontname', 'Arial', 'Color', 'k', 'FontSize', 24, ...
    'FontWeight', 'Bold');

% subplot (b)
ens = load('...\Best binary classification object for ESP.mat');
Truelabels = ens.ens.Y;
% Validation and Acquiring accuracy metrics
cvens = crossval(ens.ens, 'Kfold', 10);
Predictedlabels = kfoldPredict(cvens);
Variables = [Truelabels Predictedlabels];

```

```

Variables_table = array2table(Variables, 'VariableNames', {'Truelabels' 'Predictedlabels'});
writetable(Variables_table, '...\ESP_Classification_cross_validation.txt');
T = readtable('...\ESP_Classification_cross_validation', 'FileType', ...
    'text', 'Delimiter', ',', 'PreserveVariableNames', true);
Truelabels = T.Truelabels;
Predictedlabels = T.Predictedlabels;
C = confusionmat(Truelabels, Predictedlabels);
cm = confusionchart(C, 'RowSummary', 'row-normalized', 'ColumnSummary', 'column-normalized');
% The generated figure was exported to Microsoft PowerPoint and after modifications was sent
to ArcMap
subplot(2,3,4);
set(gca, 'fontname', 'Arial', 'FontSize', 20)
ax = gca;
box on
ax.XTick = [];
ax.YTick = [];
ax.LineWidth = 1;
ax.XColor = 'k';
ax.YColor = 'k';
ty = ylabel('True class', 'Color', 'k');
ty.Position = [-0.08 0.65 0];
tx = xlabel('Predicted class', 'Color', 'k');
tx.Position = [0.46 -0.087 0];
title('Soil sodicity classification', 'FontSize', 18);
text(-0.12, 1.1, 0, 'b', 'Units', 'Normalized', 'fontname', 'Arial', 'Color', 'k', ...
    'FontSize', 24, 'FontWeight', 'Bold');

% Figure 1 subplots (c to f)
% subplot(c)
ens = load('...\Best regression model object fitted to saline class.mat');
ytrue_log = ens.ens.Y;
ytrue = 10.^(ytrue_log);
% Validation and Acquiring accuracy metrics
cvens = crossval(ens.ens, 'Kfold', 10);
yfit_log = kfoldPredict(cvens);
yfit = 10.^(yfit_log);
Variables = [ytrue yfit];
Variables_table = array2table(Variables, 'VariableNames', {'ytrue' 'yfit'});
writetable(Variables_table, '...\ECe_regression_cross_validation.txt');
T = readtable('...\ECe_regression_cross_validation', 'FileType', ...
    'text', 'Delimiter', ',', 'PreserveVariableNames', true);
ytrue = T.ytrue;
yfit = T.yfit;
subplot(2,3,2);
binscatter(ytrue, yfit, 90)
set(gca, 'XScale', 'log', 'YScale', 'log', 'fontname', 'Arial', 'FontSize', 20)
title('Actual vs fitted: Saline class', 'Color', 'k', 'FontSize', 18);
ylabel('Predicted ECe (dS m-1)', 'Color', 'k');
xlabel('Observed ECe (dS m-1)', 'Color', 'k');
xlim([1.9 67]);
ylim([1.9 100]);
xticks([2 5 10 30 65]);
yticks([2 5 10 30 65]);
colormap hot
c = colorbar;
c.Label.String = 'Scatter density in bins';
box on
ax = gca;
ax.XColor = 'k';
ax.YColor = 'k';
ax.LineWidth = 1;
hold on
x = 1.8:0.001:67; y = 1.8:0.001:67;
line(x, y, 'Color', 'r', 'LineWidth', 1);
text(0.025, 0.89, '{\it n} = 42,984', 'Units', 'Normalized', 'fontname', ...
    'Arial', 'Color', 'r', 'FontSize', 14)
text(0.025, 0.96, '10-fold cross-validation {\it R2} = 0.724', ...
    'Units', 'Normalized', 'fontname', 'Arial', 'Color', 'r', 'FontSize', 14)
text(-0.2, 1.1, 0, 'c', 'Units', ...
    'Normalized', 'fontname', 'Arial', 'Color', 'k', 'FontSize', 24, 'FontWeight', 'Bold');

% subplots (d)
ens = load('...\Best model object for regression on sodic class.mat');
ytrue_log = ens.ens.Y;
ytrue = 10.^(ytrue_log);
% Validation and Acquiring accuracy metrics
cvens = crossval(ens.ens, 'Kfold', 10);

```

```

yfit_log = kfoldPredict(cvens);
yfit = 10.^(yfit_log);
Variables = [ytrue yfit];
Variables_table = array2table(Variables, 'VariableNames', {'ytrue' 'yfit'});
writetable(Variables_table, '\ESP_regression_cross_validation.txt');
T = readtable('\ESP_regression_cross_validation', 'FileType', ...
    'text', 'Delimiter', ',', 'PreserveVariableNames', true);

ytrue = T.ytrue;
yfit = T.yfit;
subplot(2,3,5);
binscatter(ytrue,yfit,100)
set(gca, 'XScale', 'log', 'YScale', 'log', 'fontname', 'Arial', 'FontSize', 20)
title('Actual vs fitted: Sodic class', 'Color', 'k', 'FontSize', 18);
ylabel('Predicted ESP (%)', 'Color', 'k'); xlabel('Observed ESP (%)', 'Color', 'k');
xlim([1 102]);
ylim([1 160]);
xticks([1 5 10 100]);
yticks([1 5 10 100]);
colormap hot
c = colorbar;
c.Label.String = 'Scatter density in bins';
box on
ax = gca;
ax.LineWidth = 1;
ax.XColor = 'k';
ax.YColor = 'k';
hold on
x = 1:0.001:100; y = 1:0.001:100;
line(x,y, 'Color', 'r', 'LineWidth', 1);
text(0.025, 0.89, '\it n = 197,988', 'Units', 'Normalized', 'fontname', 'Arial', 'Color', 'r', 'FontSize', 14)
text(0.025, 0.96, '10-fold cross-validation {\it R^2} = 0.726', ...
    'Units', 'Normalized', 'fontname', 'Arial', 'Color', 'r', 'FontSize', 14)
text(-0.2, 1.1, 0, 'd', 'Units', ...
    'Normalized', 'fontname', 'Arial', 'Color', 'k', 'FontSize', 24, 'FontWeight', 'Bold');

% subplot (e)
T = readtable('\predicted_ECe', 'FileType', ...
    'text', 'Delimiter', ',', 'PreserveVariableNames', true);
% T is the table including information on the present study predictions, HWSD predictions, and
surface measurements of ECe
ECe = T.ECe;
ECe_predicted = T.ECe_predicted;
t_ece_HWSD = T.ECe_HWSD;
subplot(2,3,3);
hold on
p1 = scatter(ECe, ECe_predicted, 7, 'filled', 'o', 'MarkerFaceColor', ...
    [0.9290 0.6940 0.1250], 'MarkerEdgeColor', [0.9290 0.6940 0.1250]);
p2 = scatter(ECe, t_ece_HWSD, 7, 'filled', 'o', 'MarkerFaceColor', ...
    [0.6350 0.0780 0.1840], 'MarkerEdgeColor', [0.6350 0.0780 0.1840]);
set(gca, 'XScale', 'log', 'YScale', 'log', 'fontname', 'Arial', 'FontSize', 20)
title('Soil salinity predictions', 'Color', 'k', 'FontSize', 18)
box on
ax = gca;
ax.XColor = 'k';
ax.YColor = 'k';
ax.LineWidth = 1;
ylabel('Predicted EC_{e} (dS m^{-1})', 'Color', 'k');
xlabel('Observed EC_{e} (dS m^{-1})', 'Color', 'k');
xlim([0.01 110]);
ylim([0.01 110]);
xticks([0.1 1 10 80]);
yticks([0.1 1 10 80]);
x = 0.01:0.001:105; y = 0.01:0.001:105;
line(x,y, 'Color', 'k', 'LineWidth', 1);
text(0.025, 0.93, '\it n = 9,293', 'Units', 'Normalized', ...
    'fontname', 'Arial', 'Color', 'k', 'FontSize', 14)
text(-0.16, 1.1, 0, 'e', 'Units', 'Normalized', ...
    'fontname', 'Arial', 'Color', 'k', 'FontSize', 24, 'FontWeight', 'Bold');
R_squared_ECe_present = sum((ECe_predicted - mean(ECe)).^2)/sum((ECe - mean(ECe)).^2);
R_squared_ECe_HWSD = sum((t_ece_HWSD - mean(ECe)).^2)/sum((ECe - mean(ECe)).^2);
L = legend([p1 p2], 'Present study', ...
    'HWSD', 'Location', 'southeast', 'FontSize', 16);
L.Title.Color = 'k';
ax.YAxisLocation = 'right';

% subplot (e)

```

```

T1 = readtable('F:\Other_maps_comparison\Gound_points\predicted_ESP_HWSD','FileType',...
    'text','Delimiter',' ','PreserveVariableNames',true);
% T1 is the table including information on the present study predictions, HWSD predictions,
and surface measurements of ESP
subplot(2,3,6);
ESP_1 = T1.ESP;
ESP_predicted = T1.ESP_predicted;
t_esp_HWSD = T1.ESP_HWSD;
hold on
p1 = scatter(ESP_1,ESP_predicted,7,'filled','o','MarkerFaceColor', ...
    [0.9290 0.6940 0.1250],'MarkerEdgeColor',[0.9290 0.6940 0.1250]);
p2 = scatter(ESP_1,t_esp_HWSD,7,'filled','o','MarkerFaceColor',[0.6350 0.0780 0.1840], ...
    'MarkerEdgeColor',[0.6350 0.0780 0.1840]);
set(gca,'XScale','log','YScale','log','fontname','Arial','FontSize',20)
title('Soil sodicity predictions','Color','k','FontSize',18)
box on
ax = gca;
ax.LineWidth = 1; ax.YAxisLocation = 'right';
ax.XColor = 'k';
ax.YColor = 'k';
ylabel('Predicted ESP (%)','Color','k');
xlabel('Observed ESP (%)','Color','k');
xlim([0.01 600]);
ylim([0.01 1700]);
xticks([0.1 1 10 100]);
xticklabels({'0.1','1','10','100'});
yticklabels({'0.1','1','10','100'});
yticks([0.1 1 10 100]);
x = 0.01:0.001:2000;y = 0.01:0.001:2000;
line(x,y,'Color','k','LineWidth',1);
text(0.025,0.94,{'\it n_{total} = 30,491','Units','Normalized','fontname', ...
    'Arial','Color','k','FontSize',14}
text(-0.16,1.1,0,'f','Units','Normalized','fontname', ...
    'Arial','Color','k','FontSize',24,'FontWeight','Bold');
R_squared_ESP_present_HWSD = sum((ESP_predicted - mean(ESP_1)).^2)/ ...
sum((ESP_1 - mean(ESP_1)).^2);
R_squared_ESP_HWSD = sum((t_esp_HWSD - mean(ESP_1)).^2)/ ...
sum((ESP_1 - mean(ESP_1)).^2);
L = legend([p1 p2],'Present study','HWSD','Location','southeast','FontSize',16);

```

## References

1. Y. Fan, H. Li, G. Miguez-Macho, Global patterns of groundwater table depth. *Science* **339**, 940-943 (2013).
2. T. Marthews, S. Dadson, B. Lehner, S. Abele, N. Gedney, A high-resolution global dataset of topographic index values for use in large-scale hydrological modelling. *Hydrology and Earth System Sciences Discussions* **11**, 6139-6166 (2014).
3. J. D. Pelletier *et al.*, A gridded global data set of soil, intact regolith, and sedimentary deposit thicknesses for regional and global land surface modeling. *Journal of Advances in Modeling Earth Systems* **8**, 41-65 (2016).
4. L. Breiman, Random forests. *Machine learning* **45**, 5-32 (2001).
5. J. E. Nash, J. V. Sutcliffe, River flow forecasting through conceptual models part I— A discussion of principles. *Journal of hydrology* **10**, 282-290 (1970).
6. N. V. Chawla, K. W. Bowyer, L. O. Hall, W. P. Kegelmeyer, SMOTE: synthetic minority over-sampling technique. *Journal of artificial intelligence research* **16**, 321-357 (2002).
7. C. E. Shannon, Communication in the presence of noise. *Proceedings of the IRE* **37**, 10-21 (1949).
